# Supplementary material for: Metal-free, photoinduced remote C(sp3)–H borylation
Source: Royal Society of Chemistry journal article supplement (doi:10.1039/d3sc03048b), 2023-01-01
Supplement: d3sc03048b1.pdf [file d3sc03048b1.pdf]

## SUPPORTING INFORMATION

Metal-Free, Photoinduced Remote C(sp<sup>3</sup>)-H Borylation

Jiachen He, Silas P. Cook \*

Department of Chemistry, Indiana University  
800 East Kirkwood Avenue, Bloomington, IN 47405 (United States)

### Table of Contents

|                                                      |    |
|------------------------------------------------------|----|
| <b>1. General Information</b> .....                  | 2  |
| <b>2. Preparation of Starting Materials</b> .....    | 3  |
| <b>3. Additional Optimization Studies</b> .....      | 19 |
| <b>4. C(sp<sup>3</sup>)-H bonds Borylation</b> ..... | 20 |
| <b>5. Mechanistic Studies</b> .....                  | 38 |
| <b>6. References</b> .....                           | 42 |
| <b>7. NMR Spectrum</b> .....                         | 43 |

## 1. General Information

All reactions were carried out under nitrogen atmosphere in glass vials fitted with rubber septa, unless otherwise stated. Analytical grade solvents and commercially available reagents were purchased from commercial sources and used directly without further purification unless otherwise stated. Dry solvents were obtained by distillation from drying reagents according to procedures described in Purification of Laboratory Chemicals (5th Edition) written by Wilfred L.F. Armarego and Christina L.L. Chai (Elsevier, 2003).

Thin-layer chromatography (TLC) was carried out on Merck 60 F<sub>254</sub> precoated, glass silica flash plates which were visualized with either ultraviolet light or stained with KMnO<sub>4</sub>. Automated column chromatography was performed on a Biotage Isolera One using Biotage Snap Ultra cartridges (25g or 50g SiO<sub>2</sub>) or a Yamazen Universal Premium column (55g SiO<sub>2</sub>).

<sup>1</sup>H-NMR and <sup>13</sup>C-NMR spectra were recorded at room temperature using a Varian I400 (<sup>1</sup>H-NMR at 400 MHz and <sup>13</sup>C-NMR at 100 MHz), Varian VXR400 (<sup>1</sup>H-NMR at 400 MHz and <sup>13</sup>C-NMR at 100 MHz), Varian I500 (<sup>1</sup>H-NMR at 500 MHz and <sup>13</sup>C-NMR at 125 MHz), Varian I600 (<sup>1</sup>H-NMR at 600 MHz). <sup>19</sup>F-NMR spectra were recorded at room temperature using a Varian I400 or VXR400 (<sup>19</sup>F-NMR at 376 MHz). Chemical shifts are reported in ppm with reference to solvent signals [<sup>1</sup>H-NMR: CDCl<sub>3</sub> (7.26 ppm); <sup>13</sup>C-NMR: CDCl<sub>3</sub> (77.16 ppm)]. Signal patterns are indicated as s, singlet; d, doublet; t, triplet; q, quartet; and m, multiplet.

High Resolution Mass (HRMS) analysis was obtained using Electron Impact Ionization (EI, Agilent 7890B Gas Chromatograph (GC) with an Agilent 7250 Quadrupole-Time-of-Flight (Q-TOF)) and reported as m/z (relative intensity) for the molecular ion [M], or using Atmospheric Pressure Chemical Ionization (APCI, Agilent 1200 HPLC-6130 MSD with a quadrupole mass spectrometer) and reporting the molecular ion [M+H]<sup>+</sup> or a suitable fragment ion.

All photochemical reactions were performed in 10 mL long-neck vials (unless noted otherwise) under an argon atmosphere at room temperature. The reactions were carried out with irradiation by Kessil lamps PR160L (max 45 W, λ<sub>max</sub> = 440 nm). Degassing of reactions was achieved by three freeze-pump-thaw cycles.

## 2. Preparation of Starting Materials

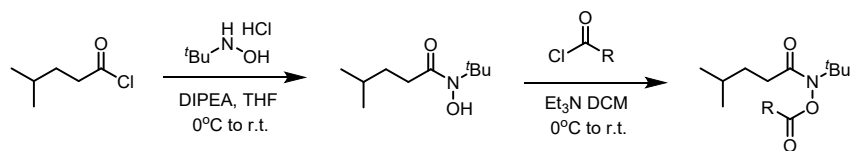

### General procedure A:

Starting materials were prepared from corresponding acyl chloride or carboxylic acid on a 2-4 mmol scale. The yields have not been optimized.

Step 1: To a solution of *N*-(*tert*-Butyl)hydroxylamine hydrochloride (1.0 equiv) in anhydrous THF (0.4 M) at 0 °C was added DIPEA (2.0 equiv) slowly. The mixture was stirred for 10 minutes at the same temperature. Then, 4-methylvaleryl chloride (1.0 equiv) in anhydrous THF was added dropwise over 20 minutes and the mixture was allowed to warm to room temperature overnight. The solvent was removed in *vacuo*. The mixture was diluted with saturated NaHCO<sub>3</sub> and EtOAc. The aqueous layer was extracted with EtOAc. The combined organic layers were washed with 1.0 M HCl, saturated NaHCO<sub>3</sub>, and brine. The crude mixture was then concentrated via rotary evaporation. The intermediate was used directly for the next step or simply purified by flash column chromatography on silica gel.

Step 2: To a solution of hydroxylamine intermediate (1.0 equiv) in anhydrous CH<sub>2</sub>Cl<sub>2</sub> (0.4 M) at 0 °C was added Et<sub>3</sub>N (2.0 equiv) dropwise. Then a corresponding acid chloride (1.5 equiv) was added dropwise over 10 minutes. The reaction was stirred vigorously at room temperature for 4 hours. The reaction was quenched by saturated NaHCO<sub>3</sub>. The layers were separated. The aqueous layer was extracted with DCM. The combined organic layers were subsequently washed with 1.0 M HCl, saturated NaHCO<sub>3</sub>, and brine. The crude was then concentrated. Purification by column chromatography on silica gel eluting with hexanes/EA gave **6-10**. (The products were found to decompose slowly on silica gel. The compounds are relatively stable at room temperature (around one month) and should be stored in the freezer for long-term storage.)

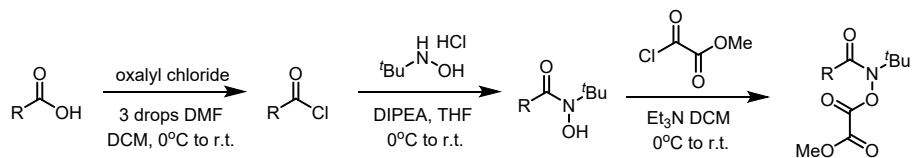

### General procedure B:

The starting materials were prepared from corresponding acyl chloride or carboxylic acid on a 2-4 mmol scale. The yields have not been optimized.

Step 1: To a solution of carboxylic acid (1.0 equiv) and 3-5 drops of anhydrous DMF in anhydrous CH<sub>2</sub>Cl<sub>2</sub> (0.5 M) at 0 °C was added oxalyl chloride (2.0 equiv) dropwise over 15 minutes. The reaction was stirred vigorously at room temperature for 4 hours. The solvent was removed in *vacuo*. The resulting acyl chloride was redissolved in anhydrous THF (1-2 mL) and used directly for the next step without further purification.

Step 2: To a solution of *N*-(*tert*-Butyl)hydroxylamine hydrochloride (1.0 equiv) in anhydrous THF (0.4 M) at 0 °C was added DIPEA (2.0 equiv) slowly. The mixture was stirred for 10 minutes at the same temperature. Then, acyl chloride (1.0 equiv) in anhydrous THF was added dropwise over 20 minutes. The reaction mixture was allowed to warm to room temperature overnight. The solvent was removed in *vacuo*. The mixture was diluted with saturated NaHCO<sub>3</sub> and EtOAc. The aqueous layer was extracted with EtOAc. The combined organic layers were washed with 1.0 M HCl, saturated NaHCO<sub>3</sub>, and brine. The crude was then concentrated under reduce pressure. The intermediate was used directly for the next step or simply purified by flash column chromatography on silica gel.

Step 3: To a solution of hydroxylamine intermediate (1.0 equiv) in anhydrous CH<sub>2</sub>Cl<sub>2</sub> (0.4 M) at 0 °C, Et<sub>3</sub>N (2.0 equiv) was added dropwise. Then methyl oxalyl chloride (1.5 equiv) was added dropwise over 10 minutes. The reaction was stirred vigorously at room temperature for 4 hours. The mixture was diluted with saturated NaHCO<sub>3</sub> and DCM. The layers were separated. The aqueous layer was extracted with DCM. The combined organic layers were washed with 1.0 M HCl, saturated NaHCO<sub>3</sub>, and brine. The crude was then concentrated under reduce pressure. Purification by column chromatography on silica gel eluting with hexanes/EA gave **1a-48a**, **53a**. (*The products were found to decompose slowly on silica gel. The compounds are relatively stable at room temperature (around one month) and should be stored in the freezer for long-term storage.*)

The compounds **1<sup>1</sup>**, **2<sup>2</sup>**, **3<sup>3</sup>**, **5<sup>4</sup>**, **9<sup>5</sup>**, **11a<sup>1</sup>**, **13a-15a<sup>1</sup>**, **20a-23a<sup>1</sup>**, **25a-28a<sup>1</sup>**, **29a<sup>5</sup>**, **31a<sup>5</sup>**, **54a<sup>1</sup>** were synthesized according to previous literature.



## Characterization of Substrates

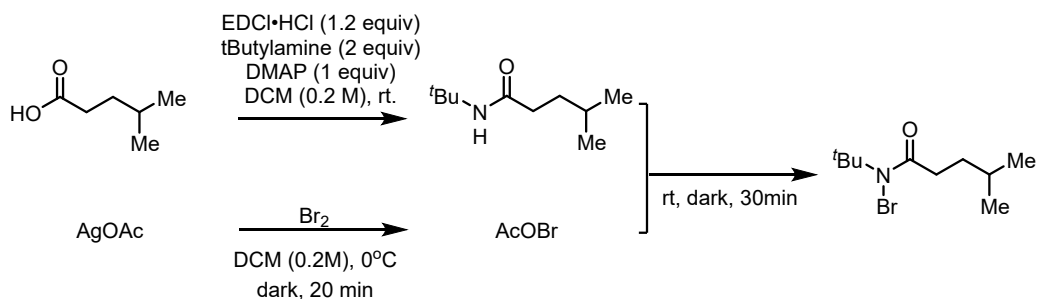

***N*-bromo-*N*-(*tert*-butyl)-4-methylpentanamide (4):** To a flame-dried round bottom flask equipped with a stir bar was subsequently added carboxylic acid (1.0 equiv), DMAP (1.0 equiv), EDCI·HCl (1.2 equiv), and DCM (0.2 M). The solution was stirred at room temperature until all solid dissolved. *tert*-Butylamine (2.0 equiv) was added, and the reaction was stirred at room temperature for overnight. The reaction was quenched with 1.0 M aqueous HCl (30 mL) and extracted with DCM (3 x 50 mL). The combined organic layers were washed with brine, dried over MgSO<sub>4</sub>, and concentrated by rotary evaporation. The crude amide was used without further purification or purified by flash column chromatography on silica gel.

Follow a procedure described in the literature,<sup>6</sup> to a flame-dried round bottom flask equipped with a stir bar was added AgOAc (3.2 equiv) and CCl<sub>4</sub> or DCM, (0.2 M). The solution was stirred at 0 °C and wrapped with aluminum foil. Br<sub>2</sub> (3.0 equiv) was then added dropwise. After 20 minutes, the reaction mixture was gravity-filtrated into another flame-dried round bottom flask pre-loaded with an amide (1.0 equiv). The round-bottom flask was wrapped with aluminum foil and stirred at room temperature for 30 minutes. The reaction was concentrated by rotary evaporation. The crude was purified by sflash column chromatography on silica gel, providing bromoamide in 65% yield. The product should be stored in aluminum-wrapped containers.

**<sup>1</sup>H NMR** (500 MHz, CDCl<sub>3</sub>): δ 2.60 – 2.55 (m, 2H), 1.59 – 1.55 (m, 1H), 1.51 – 1.48 (m, 2H), 1.47 (s, 9H), 0.91 (d, *J* = 6.6 Hz, 6H).

**<sup>13</sup>C NMR** (126 MHz, CDCl<sub>3</sub>): δ 178.1, 64.5, 36.2, 34.9, 29.8, 27.9, 22.6.

**HRMS** (EI): Calcd. for C<sub>10</sub>H<sub>20</sub>BrNO [M]<sup>+</sup>, 249.0723. Found: 249.0723.

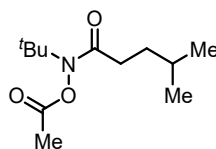

***N*-acetoxy-*N*-(*tert*-butyl)-4-methylpentanamide (6)**: Prepared according to **General Procedure A** from commercially available acetyl chloride. Purification by flash column chromatography (Biotage, Snap Ultra 25g, 5% to 20% EtOAc in Hexanes, 14 min). 72 % yield over three steps. Colorless oil.

**<sup>1</sup>H NMR** (500 MHz, CDCl<sub>3</sub>): δ 2.22 – 2.18 (m, 1H), 2.17 (s, 3H), 2.05 – 1.98 (m, 1H), 1.55 – 1.49 (m, 1H), 1.47 – 1.41 (m, 2H), 1.39 (s, 9H), 0.85 (d, *J* = 6.5 Hz, 6H).

**<sup>13</sup>C NMR** (126 MHz, CDCl<sub>3</sub>): δ 174.9, 169.7, 62.2, 33.0, 32.3, 27.7, 27.4, 22.5, 22.4, 18.3.

**HRMS** (ESI) *m/z*: [M+Na]<sup>+</sup> Calcd. for C<sub>12</sub>H<sub>23</sub>O<sub>3</sub>NNa 252.1570; Found: 252.1572.

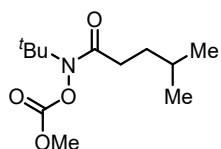

***N*-(*tert*-butyl)-*N*-((methoxycarbonyl)oxy)-4-methylpentanamide (7)**: Prepared according to **General Procedure A** from commercially available methyl chloroformate. Purification by flash column chromatography (Biotage, Snap Ultra 25g, 5% to 20% EtOAc in Hexanes, 14 min). 57 % yield over three steps. Colorless oil.

**<sup>1</sup>H NMR** (400 MHz, CDCl<sub>3</sub>) δ 3.90 (s, 3H), 2.36 – 2.18 (m, 1H), 2.14 – 2.01 (m, 1H), 1.57 – 1.39 (m, 3H), 1.39 (s, 9H), 0.84 (d, *J* = 6.4 Hz, 6H).

**<sup>13</sup>C NMR** (101 MHz, CDCl<sub>3</sub>) δ 175.9, 156.2, 63.1, 56.5, 32.8, 32.3, 27.7, 27.3, 22.5, 22.4.

**HRMS** (ESI) *m/z*: [M+Na]<sup>+</sup> Calcd. For C<sub>12</sub>H<sub>23</sub>O<sub>4</sub>NNa 268.1519; Found: 268.1521.

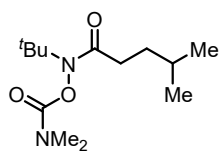

***N*-(*tert*-butyl)-*N*-((dimethylcarbamoyl)oxy)-4-methylpentanamide (8)**: Prepared according to **General Procedure A** from commercially available dimethylcarbamyl chloride. Purification by flash column chromatography (Biotage, Snap Ultra 25g, 5% to 20% EtOAc in Hexanes, 14 min). 56 % yield over three steps. Colorless oil.

**<sup>1</sup>H NMR** (500 MHz, CDCl<sub>3</sub>) δ 3.01 (s, 6H), 2.26 – 2.19 (m, 1H), 2.15 – 2.07 (m, 1H), 1.57 – 1.50 (m, 1H), 1.49 – 1.45 (m, 2H), 1.41 (s, 9H), 0.86 (d, *J* = 6.5 Hz, 6H).

**<sup>13</sup>C NMR** (126 MHz, CDCl<sub>3</sub>) δ 174.9, 155.5, 62.2, 37.7, 36.1, 33.2, 32.2, 27.8, 27.5, 22.6, 22.5.

**HRMS** (ESI) *m/z*: [M+Na]<sup>+</sup> Calcd. for C<sub>13</sub>H<sub>26</sub>O<sub>3</sub>N<sub>2</sub>Na 281.1836; Found: 281.1839.

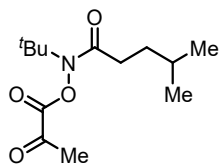

***N*-(tert-butyl)-4-methyl-N-((2-oxopropanoyl)oxy)pentanamide (10):** Prepared according to **General Procedure A** from pyruvic acid chloride. Purification by flash column chromatography (Biotage, Snap Ultra 25g, 5% to 20% EtOAc in Hexanes, 14 min). 24 % yield over three steps. Colorless oil.

**<sup>1</sup>H NMR** (400 MHz, CDCl<sub>3</sub>) δ 2.55 (s, 3H), 2.28 – 2.16 (m, 1H), 2.09 – 1.99 (m, 1H), 1.57 – 1.44 (m, 3H), 1.42 (s, 9H), 0.85 (d, *J* = 6.3 Hz, 6H).

**<sup>13</sup>C NMR** (101 MHz, CDCl<sub>3</sub>) δ 190.0, 175.8, 160.4, 63.3, 32.8, 32.5, 27.7, 27.5, 27.4, 22.4.

**HRMS** (ESI) *m/z*: [M+CH<sub>3</sub>OH+Na]<sup>+</sup> Calcd. for C<sub>14</sub>H<sub>27</sub>O<sub>5</sub>NNa 312.1781; Found: 312.1784.

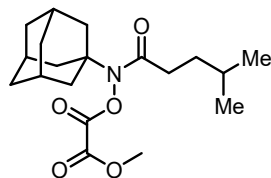

***Methyl 2-((N-((3s,5s,7s)-adamantan-1-yl)-4-methylpentanamido)oxy)-2-oxoacetate (12a):*** Prepared according to **General Procedure A**, replacing *N*-(tert-Butyl)hydroxylamine hydrochloride with 1-(Hydroxylamino)adamantane hydrochloride.<sup>7</sup> 1-(Hydroxylamino)adamantane hydrochloride was synthesized according to previous literature. [cite]Purification by flash column chromatography (Biotage, Snap Ultra 25g, 5% to 20% EtOAc in Hexanes, 14 min). 42 % yield over three steps. Colorless oil.

**<sup>1</sup>H NMR** (500 MHz, CDCl<sub>3</sub>) δ 3.97 (s, 3H), 2.29 – 2.20 (m, 1H), 2.20 – 2.13 (m, 6H), 2.10 – 2.07 (m, 4H), 1.69 – 1.60 (m, 6H), 1.55 – 1.49 (m, 1H), 1.47 – 1.42 (m, 2H), 0.84 (d, *J* = 6.5 Hz, 6H).

**<sup>13</sup>C NMR** (126 MHz, CDCl<sub>3</sub>) δ 175.3, 157.7, 157.1, 65.0, 54.2, 39.3, 36.2, 32.8, 32.7, 29.9, 27.6, 22.4.

**HRMS** (ESI) *m/z*: [M+Na]<sup>+</sup> Calcd. for C<sub>19</sub>H<sub>29</sub>O<sub>5</sub>NNa 374.1938; Found: 374.1940.

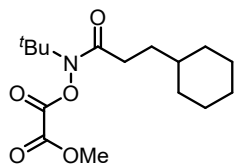

**Methyl 2-((N-(tert-butyl)-3-cyclohexylpropanamido)oxy)-2-oxoacetate (16a):** Prepared according to **General Procedure B** from commercially available cyclohexane propionic acid. Purification by flash column chromatography (Biotage, Snap Ultra 25g, 5% to 20% EtOAc in Hexanes, 14 min). 41 % yield over two steps. Colorless oil.

**<sup>1</sup>H NMR** (500 MHz, CDCl<sub>3</sub>) δ 3.96 (s, 3H), 2.31 – 2.19 (m, 1H), 2.16 – 2.04 (m, 1H), 1.69 – 1.55 (m, 5H), 1.47 – 1.42 (m, 2H), 1.41 (s, 9H), 1.22 – 1.07 (m, 4H), 0.88 – 0.78 (m, 2H).

**<sup>13</sup>C NMR** (126 MHz, CDCl<sub>3</sub>) δ 176.1, 157.4, 157.0, 63.5, 54.1, 37.2, 33.1, 32.0, 31.3, 27.5, 26.6, 26.3.

**HRMS** (ESI) m/z: [M+Na]<sup>+</sup> Calcd. for C<sub>16</sub>H<sub>27</sub>O<sub>5</sub>NNa 336.1781; Found: 336.1783.

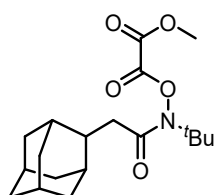

**Methyl 2-((2-((1R,2S,5S)-adamantan-2-yl)-N-(tert-butyl)acetamido)oxy)-2-oxoacetate (17a):** Prepared according to **General Procedure B** from commercially available 2-(adamantan-2-yl)acetic acid. Purification by flash column chromatography (Biotage, Snap Ultra 25g, 5% to 20% EtOAc in Hexanes, 14 min). 42 % yield over three steps. Colorless oil.

**<sup>1</sup>H NMR** (500 MHz, CDCl<sub>3</sub>) δ 3.98 (s, 3H), 2.45 – 2.32 (m, 1H), 2.30 – 2.21 (m, 2H), 1.89 – 1.84 (m, 1H), 1.82 – 1.63 (m, 11H), 1.53 (d, J = 12.6 Hz, 2H), 1.43 (d, J = 1.2 Hz, 9H).

**<sup>13</sup>C NMR** (126 MHz, CDCl<sub>3</sub>) δ 175.5, 157.6, 157.2, 63.6, 54.2, 39.9, 39.1, 38.3, 37.7, 32.3, 31.9, 28.0, 27.6.

**HRMS** (ESI) m/z: [M+Na]<sup>+</sup> Calcd. for C<sub>19</sub>H<sub>29</sub>O<sub>5</sub>NNa 374.1938; Found: 374.1938.

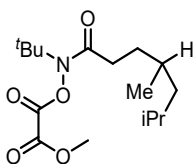

**Methyl 2-((N-(tert-butyl)-4,6-dimethylheptanamido)oxy)-2-oxoacetate (18a):** Prepared according to **General Procedure B** from 4,6-dimethylheptanoic acid. 4,6-dimethylheptanoic acid was synthesized according to previous literature.<sup>8</sup> Purification by flash column chromatography (Biotage, Snap Ultra 25g, 5% to 20% EtOAc in Hexanes, 14 min). 43 % yield over three steps. Colorless oil.

**<sup>1</sup>H NMR** (500 MHz, CDCl<sub>3</sub>) δ 3.97 (s, 3H), 2.34 – 2.19 (m, 1H), 2.17 – 1.99 (m, 1H), 1.66 – 1.52 (m, 2H), 1.49 – 1.43 (m, 1H), 1.43 (s, 9H), 1.39 – 1.30 (m, 1H), 1.09 – 1.03 (m, 1H), 1.01 – 0.94 (m, 1H), 0.88 – 0.82 (m, 3H), 0.82 – 0.79 (m, 6H).

$^{13}\text{C}$  NMR (126 MHz,  $\text{CDCl}_3$ )  $\delta$  176.1, 157.5, 157.1, 63.5, 54.2, 46.6, 32.3, 31.3, 30.0, 27.5, 25.3, 23.4, 22.4, 19.6.

HRMS (ESI)  $m/z$ :  $[\text{M}+\text{Na}]^+$  Calcd. for  $\text{C}_{16}\text{H}_{29}\text{O}_5\text{NNa}$  338.1938; Found: 338.1940.

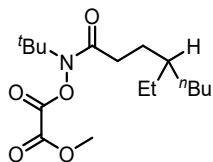

**Methyl 2-((N-(tert-butyl)-4-ethyloctanamido)oxy)-2-oxoacetate (19a):** Prepared according to **General Procedure B** from commercially available 4-ethyloctanoic acid. Purification by flash column chromatography (Biotage, Snap Ultra 25g, 5% to 20% EtOAc in Hexanes, 14 min). 43 % yield over three steps. Colorless oil.

$^1\text{H}$  NMR (500 MHz,  $\text{CDCl}_3$ )  $\delta$  3.97 (s, 3H), 2.28 – 2.17 (m, 1H), 2.12 – 2.00 (m, 1H), 1.55 – 1.47 (m, 2H), 1.43 (s, 9H), 1.29 – 1.13 (m, 9H), 0.86 (t,  $J = 7.0$  Hz, 3H), 0.82 (t,  $J = 7.1$  Hz, 3H).

$^{13}\text{C}$  NMR (126 MHz,  $\text{CDCl}_3$ )  $\delta$  176.2, 157.5, 157.1, 63.5, 54.2, 38.44 32.7, 32.1, 28.9, 27.5, 27.4, 25.8, 23.2, 14.2, 10.8.

HRMS (ESI)  $m/z$ :  $[\text{M}+\text{Na}]^+$  Calcd. for  $\text{C}_{17}\text{H}_{31}\text{O}_5\text{NNa}$  352.2074; Found: 352.2096.

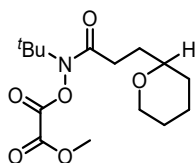

**Methyl 2-((N-(tert-butyl)-3-(tetrahydro-2H-pyran-2-yl)propanamido)oxy)-2-oxoacetate (24a):** Prepared according to **General Procedure B** from 3-(tetrahydropyran-2-yl)propionic acid. 3-(tetrahydropyran-2-yl)propionic acid was synthesized according to previous literature.<sup>9</sup> Purification by flash column chromatography (Biotage, Snap Ultra 25g, 5% to 20% EtOAc in Hexanes, 14 min). 35 % yield over three steps. Colorless oil.

$^1\text{H}$  NMR (500 MHz,  $\text{CDCl}_3$ )  $\delta$  3.96 (s, 3H), 3.92 – 3.85 (m, 1H), 3.41 – 3.30 (m, 1H), 3.25 – 3.15 (m, 1H), 2.50 – 2.34 (m, 1H), 2.28 – 2.13 (m, 1H), 1.81 – 1.71 (m, 2H), 1.69 – 1.59 (m, 1H), 1.58 – 1.52 (m, 1H), 1.51 – 1.44 (m, 3H), 1.43 (s, 9H), 1.27 – 1.17 (m, 1H).

$^{13}\text{C}$  NMR (126 MHz,  $\text{CDCl}_3$ )  $\delta$  175.8, 157.3, 156.9, 76.7, 68.5, 63.6, 54.2, 32.1, 30.6, 30.4, 27.5, 26.2, 23.6.

HRMS (ESI)  $m/z$ :  $[\text{M}+\text{Na}]^+$  Calcd. for  $\text{C}_{15}\text{H}_{25}\text{O}_6\text{NNa}$  338.1574; Found: 338.1577.

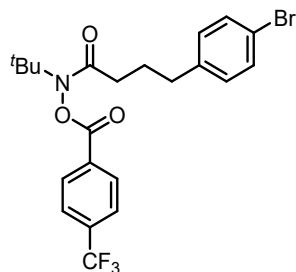

**4-(4-bromophenyl)-N-(tert-butyl)-N-((4-(trifluoromethyl)benzoyl)oxy)butanamide (30a):**

Modifying from **General Procedure B**. To a solution of 4-bromobenzenebutanoic acid (1.0 equiv) and 3-5 drops of anhydrous DMF in anhydrous  $\text{CH}_2\text{Cl}_2$  (0.5 M) at 0 °C was added oxalyl chloride (2.0 equiv) dropwise over 15 minutes. The reaction was stirred vigorously at room temperature for 4 hours. The solvent was removed in *vacuo*. The resulting acyl chloride was redissolved in anhydrous THF (1-2 mL) and used directly for the next step without further purification.

To a solution of *N*-(tert-Butyl)hydroxylamine hydrochloride (1.0 equiv) in anhydrous THF (0.4 M) at 0 °C was added DIPEA (2.0 equiv) slowly. The mixture was stirred for 10 minutes at the same temperature. Then, acyl chloride (1.0 equiv) in anhydrous THF was added dropwise over 20 minutes. The reaction mixture was allowed to warm to room temperature overnight. The solvent was removed in *vacuo*. The mixture was diluted with saturated  $\text{NaHCO}_3$  and EtOAc. The aqueous layer was extracted with EtOAc. The combined organic layers were washed with 1.0 M HCl, saturated  $\text{NaHCO}_3$ , and brine. The crude was then concentrated under reduce pressure. The intermediate was used directly for the next step or simply purified by flash column chromatography on silica gel.

To a solution of hydroxylamine intermediate (1.0 equiv) in anhydrous  $\text{CH}_2\text{Cl}_2$  (0.4 M) at 0 °C,  $\text{Et}_3\text{N}$  (2.0 equiv) was added dropwise. Then 4-trifluoromethyl-benzoyl chloride (1.5 equiv) was added dropwise over 10 minutes. The reaction was stirred vigorously at room temperature for 4 hours. The mixture was diluted with saturated  $\text{NaHCO}_3$  and DCM. The layers were separated. The aqueous layer was extracted with DCM. The combined organic layers were washed with 1.0 M HCl, saturated  $\text{NaHCO}_3$ , and brine. The crude was then concentrated under reduce pressure. Purification by flash column chromatography (Biotage, Snap Ultra 25g, 5% to 30% EtOAc in Hexanes, 14 min). 56 % yield over three steps. Colorless oil.

**$^1\text{H}$  NMR** (500 MHz,  $\text{CDCl}_3$ )  $\delta$  8.14 (d,  $J = 8.1$  Hz, 2H), 7.80 (d,  $J = 8.3$  Hz, 2H), 7.31 – 7.27 (m, 2H), 7.00 – 6.90 (m, 2H), 2.61 – 2.51 (m, 2H), 2.29 – 2.21 (m, 1H), 2.14 – 2.04 (m, 1H), 1.94 – 1.84 (m, 2H), 1.48 (s, 9H).

**$^{13}\text{C}$  NMR** (126 MHz,  $\text{CDCl}_3$ )  $\delta$  174.2, 164.6, 140.7, 136.0 (q,  $J = 33.0$  Hz), 131.4, 130.5, 130.3, 130.1, 126.2 (q,  $J = 3.7$  Hz), 123.5 (q,  $J = 273.0$  Hz), 119.7, 63.07, 34.5, 33.3, 27.6, 25.6.

**HRMS** (ESI)  $m/z$ :  $[\text{M}+\text{Na}]^+$  Calcd. for  $\text{C}_{22}\text{H}_{23}\text{O}_3\text{NBrF}_3\text{Na}$  510.0688; Found: 508.0706.

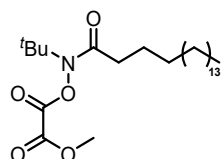

**Methyl 2-((N-(tert-butyl)stearamido)oxy)-2-oxoacetate (32a):** Prepared according to **General Procedure B** from commercially available stearic acid. Purification by flash column chromatography (Biotage, Snap Ultra 25g, 5% to 20% EtOAc in Hexanes, 14 min). 52 % yield over three steps. Colorless oil.

$^1\text{H NMR}$  (500 MHz,  $\text{CDCl}_3$ )  $\delta$  3.97 (s, 3H), 2.33 – 2.15 (m, 1H), 2.11 – 2.02 (m, 1H), 1.59 – 1.53 (m, 2H), 1.43 (s, 9H), 1.30 – 1.13 (m, 28H), 0.87 (d,  $J = 7.2\text{Hz}$ , 3H).

$^{13}\text{C NMR}$  (126 MHz,  $\text{CDCl}_3$ )  $\delta$  175.9, 157.4, 157.1, 63.5, 54.2, 34.5, 32.1, 29.8, 29.8, 29.8, 29.7, 29.6, 29.6, 29.5, 29.2, 27.5, 24.0, 22.8, 14.3.

**HRMS** (ESI)  $m/z$ :  $[\text{M}+\text{Na}]^+$  Calcd. for  $\text{C}_{25}\text{H}_{47}\text{O}_5\text{NNa}$  464.3346; Found: 464.3347.

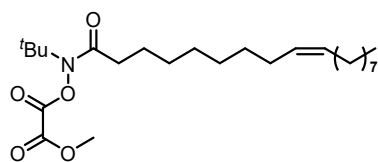

**Methyl 2-((N-(tert-butyl)oleamido)oxy)-2-oxoacetate (33a):** Prepared according to **General Procedure B** from commercially available oleic acid. Purification by flash column chromatography (Biotage, Snap Ultra 25g, 5% to 20% EtOAc in Hexanes, 14 min). 42 % yield over three steps. Colorless oil.

$^1\text{H NMR}$  (500 MHz,  $\text{CDCl}_3$ )  $\delta$  5.39 – 5.24 (m, 2H), 3.98 (s, 3H), 2.35 – 2.21 (m, 1H), 2.14 – 2.04 (m, 1H), 2.04 – 1.94 (m, 4H), 1.59 – 1.53 (m, 2H), 1.43 (s, 9H), 1.34 – 1.20 (m, 20H), 0.87 (t, 3H).

$^{13}\text{C NMR}$  (126 MHz,  $\text{CDCl}_3$ )  $\delta$  175.9, 157.4, 157.1, 130.1, 129.9, 63.5, 54.2, 34.5, 32.0, 29.9, 29.8, 29.7, 29.5, 29.3, 29.2, 27.5, 27.4, 27.3, 24.0, 22.8, 14.2.

**HRMS** (ESI)  $m/z$ :  $[\text{M}+\text{Na}]^+$  Calcd. for  $\text{C}_{25}\text{H}_{45}\text{O}_5\text{NNa}$  462.3190; Found: 462.3191.

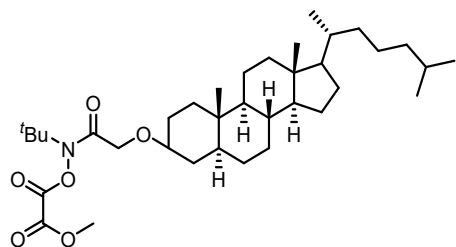

**Methyl 2-((N-(tert-butyl)-2-(((5S,8R,9S,10S,13R,14S)-10,13-dimethyl-17-((R)-6-methylheptan-2-yl)hexadecahydro-1H-cyclopenta[a]phenanthren-3-yl)oxy)acetamido)oxy)-2-oxoacetate (34a):** Prepared according to **General Procedure B** from *O*-acetic acid-dihydrocholesterol. *O*-acetic acid-dihydrocholesterol was synthesized according to previous literature.<sup>10</sup> Purification by flash column chromatography (Biotage, Snap Ultra 25g, 5% to 30% EtOAc in Hexanes, 14 min). 47 % yield over three steps. White solid.

$^1\text{H NMR}$  (500 MHz,  $\text{CDCl}_3$ )  $\delta$  4.03 (s, 2H), 3.96 (s, 3H), 3.33 – 3.23 (m, 1H), 1.94 (dt,  $J = 12.7, 3.5\text{ Hz}$ , 1H), 1.86 – 1.74 (m, 2H), 1.71 – 1.47 (m, 6H), 1.44 (s, 9H), 1.37 – 0.91 (m, 21H), 0.88 (d,  $J = 6.4\text{ Hz}$ , 3H), 0.84 (d,  $J = 6.7, 1.7\text{ Hz}$ , 6H), 0.76 (s, 3H), 0.62 (s, 3H), 0.60 – 0.54 (m, 1H).

$^{13}\text{C}$  NMR (126 MHz,  $\text{CDCl}_3$ )  $\delta$  172.8, 157.0, 156.8, 79.6, 67.8, 63.9, 56.6, 56.5, 54.5, 54.2, 44.8, 42.7, 40.1, 39.6, 37.0, 36.3, 35.9, 35.8, 35.6, 34.2, 32.2, 28.9, 28.4, 28.1, 27.8, 27.11, 24.31, 23.93, 22.9, 22.7, 21.3, 18.8, 12.4, 12.2.

HRMS (ESI)  $m/z$ :  $[\text{M}+\text{H}]^+$  Calcd. for  $\text{C}_{36}\text{H}_{62}\text{O}_6\text{N}$  604.4572; Found: 604.4572.

### General procedure C:

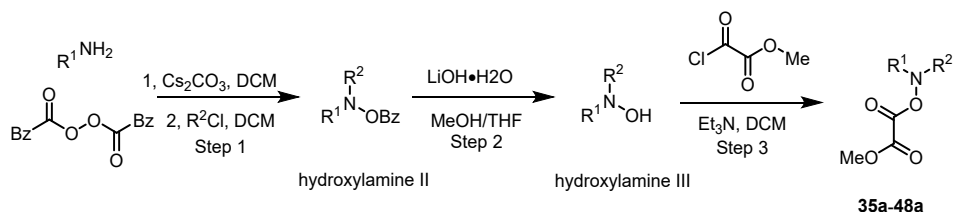

*Starting materials were prepared from corresponding acyl chloride or carboxylic acid on a 2-4 mmol scale. The yields have not been optimized.*

Following a procedure described in the literature:<sup>10</sup>

**Step 1:** To a round-bottom flask equipped with a magnetic bar was added BPO (wetted with ca. 25%  $\text{H}_2\text{O}$ ) (2.0 equiv),  $\text{Cs}_2\text{CO}_3$  (3.0 equiv), and  $\text{DCM}$  (0.1). The heterogeneous mixture was stirred for 2 h at room temperature. After that, a solution of amine (1.0 equiv) in  $\text{DCM}$  (0.25 M) was then added, and the mixture was vigorously stirred for 14 h. Then, a solution of  $\text{BzCl}$  (2.0 equiv) in  $\text{DCM}$  (0.5 M) was added. The reaction was allowed to stir for another 6 h. After the reaction completion as monitored by TLC, water was added. The reaction mixture was stirred for 15 min, extracted with  $\text{DCM}$ , washed with sat.  $\text{NaHCO}_3$  solution, brine, and concentrated under reduce pressure. The crude product was purified by silica gel column chromatography using petroleum ether/  $\text{EtOAc}$  as eluent, affording hydroxylamine II.

**Step 2:** To a stirred solution of the hydroxylamine II (1.0 equiv) in  $\text{MeOH}$  (0.5 M) and  $\text{THF}$  (1.0 M) was added  $\text{LiOH}\cdot\text{H}_2\text{O}$  (3.0 equiv). After the reaction completion as monitored by TLC (0.5-1 h), the reaction mixture was concentrated under reduced pressure. Water was then added. The product was extracted with  $\text{EtOAc}$ , washed with brine, concentrated under reduced pressure, and purified by silica gel column chromatography using petroleum ether/  $\text{EtOAc}$  as eluent to give hydroxylamine III.

**Step 3:** To a solution of the hydroxylamine III (1.0 equiv) in anhydrous  $\text{CH}_2\text{Cl}_2$  (0.35 M) at  $0\text{ }^\circ\text{C}$  was added  $\text{Et}_3\text{N}$  (1.5 equiv) dropwise. 4-Trifluoromethyl-benzoyl chloride (for **1y**, using 4-methylpentanoyl chloride generated from step 1 of General Procedure A) (1.0 equiv) was then added dropwise over 5 minutes. The reaction was vigorously stirred at room temperature for 2 h. The reaction mixture was then concentrated under reduce pressure. The resulting residue was added saturated  $\text{NaHCO}_3$  and  $\text{THF}$  and stirred for 30 minutes. The aqueous layer was extracted with  $\text{EtOAc}$ , successively washed with 1.0 M  $\text{HCl}$ , saturated  $\text{NaHCO}_3$ , and brine. The crude product was concentrated and purified by column chromatography on silica gel with petroleum ether/  $\text{EtOAc}$  as eluent to give **35a-48a**.



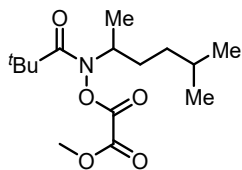

**Methyl 2-((N-(5-methylhexan-2-yl)pivalamido)oxy)-2-oxoacetate (35a):** Prepared according to **General Procedure C** from commercially available 2-amino-5-methylhexane and trimethyl acetyl chloride. Purification by flash column chromatography (Biotage, Snap Ultra 25g, 5% to 20% EtOAc in Hexanes, 14 min). 56 % yield over three steps. Colorless oil.

**<sup>1</sup>H NMR** (500 MHz, CDCl<sub>3</sub>) δ 4.38 (q, *J* = 6.9 Hz, 1H), 3.96 (s, 3H), 1.66 – 1.58 (m, 1H), 1.53 – 1.41 (m, 2H), 1.23 (s, 9H), 1.21 (d, *J* = 6.7 Hz, 3H), 1.20 – 1.14 (m, 1H), 0.86 (d, *J* = 6.6 Hz, 6H).

**<sup>13</sup>C NMR** (126 MHz, CDCl<sub>3</sub>) δ 178.8, 157.1, 156.3, 58.7, 54.1, 39.8, 35.7, 31.8, 28.1, 27.6, 22.7, 22.6, 17.8.

**HRMS** (ESI) *m/z*: [M+Na]<sup>+</sup> Calcd. for C<sub>15</sub>H<sub>27</sub>O<sub>5</sub>NNa 324.1781; Found: 324.1784.

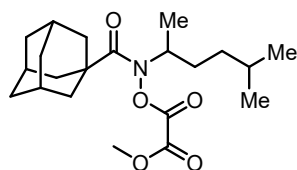

**Methyl 2-(((3*r*,5*r*,7*r*)-N-(5-methylhexan-2-yl)adamantane-1-carboxamido)oxy)-2-oxoacetate (36a):** Prepared according to **General Procedure C** from commercially available 2-amino-5-methylhexane and 1-adamantanecarbonyl chloride. Purification by flash column chromatography (Biotage, Snap Ultra 25g, 5% to 20% EtOAc in Hexanes, 14 min). 42 % yield over three steps. Colorless oil.

**<sup>1</sup>H NMR** (500 MHz, CDCl<sub>3</sub>) δ 4.39 (q, *J* = 6.9 Hz, 1H), 3.96 (s, 3H), 2.06 – 2.02 (m, 3H), 1.98 – 1.93 (m, 6H), 1.75 – 1.67 (m, 6H), 1.66 – 1.59 (m, 1H), 1.54 – 1.46 (m, 2H), 1.30 – 1.15 (m, 2H), 1.22 (d, *J* = 6.6 Hz, 3H), 0.87 (d, *J* = 6.6, 6H).

**<sup>13</sup>C NMR** (126 MHz, CDCl<sub>3</sub>) δ 178.2, 157.2, 156.3, 59.1, 54.0, 42.7, 38.5, 36.6, 35.6, 31.9, 28.3, 28.1, 22.7, 22.6, 18.1.

**HRMS** (ESI) *m/z*: [M+Na]<sup>+</sup> Calcd. for C<sub>21</sub>H<sub>33</sub>O<sub>5</sub>NNa 402.2251; Found: 402.2249.

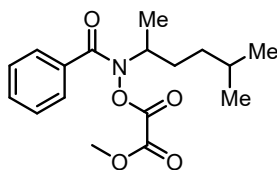

**Methyl 2-((N-(5-methylhexan-2-yl)benzamido)oxy)-2-oxoacetate (37a):** Prepared according to **General Procedure C** from commercially available 2-amino-5-methylhexane and benzoyl

chloride. Purification by flash column chromatography (Biotage, Snap Ultra 25g, 5% to 30% EtOAc in Hexanes, 14 min). 57 % yield over three steps. Colorless oil.

**<sup>1</sup>H NMR** (500 MHz, CDCl<sub>3</sub>) δ 7.65 – 7.37 (m, 5H), 4.30 – 4.17 (m, 1H), 3.93 (s, 3H), 1.81 – 1.66 (m, 1H), 1.49 – 1.41 (m, 2H), 1.32 – 1.28 (m, 1H), 1.24 (d, *J* = 6.6 Hz, 3H), 1.17 – 1.08 (m, 1H), 0.84 (dd, *J* = 6.6, 3.0 Hz, 6H).

**<sup>13</sup>C NMR** (101 MHz, CDCl<sub>3</sub>) δ 170.1, 156.6, 155.3, 133.5, 131.5, 128.7, 127.9, 58.7, 54.0, 35.3, 31.8, 27.8, 22.5, 22.5, 18.2.

**HRMS** (ESI) *m/z*: [M+Na]<sup>+</sup> Calcd. for C<sub>17</sub>H<sub>23</sub>O<sub>5</sub>NNa 344.1468; Found: 344.1468.

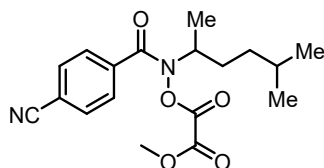

**Methyl 2-((4-cyano-N-(5-methylhexan-2-yl)benzamido)oxy)-2-oxoacetate (38a)**: Prepared according to **General Procedure C** from commercially available 2-amino-5-methylhexane and 4-cyanobenzoyl chloride. Purification by flash column chromatography (Biotage, Snap Ultra 25g, 5% to 30% EtOAc in Hexanes, 14 min). 46 % yield over three steps. White solid.

**<sup>1</sup>H NMR** (400 MHz, CDCl<sub>3</sub>) δ 7.73 (d, *J* = 1.8 Hz, 2H), 7.67 (d, *J* = 8.3 Hz, 2H), 4.29 – 4.22 (m, 1H), 3.93 (s, 3H), 1.74 – 1.65 (m, 1H), 1.52 – 1.42 (m, 2H), 1.34 – 1.22 (m, 1H), 1.25 (d, *J* = 6.6 Hz, 3H), 1.17 – 1.08 (m, 1H), 0.85 (dd, *J* = 6.6, 2.7 Hz, 6H).

**<sup>13</sup>C NMR** (126 MHz, CDCl<sub>3</sub>) δ 167.9, 156.2, 155.3, 137.7, 132.5, 128.5, 117.9, 115.1, 58.2, 54.2, 35.4, 31.7, 27.8, 22.5, 22.5, 18.2.

**HRMS** (ESI) *m/z*: [M+Na]<sup>+</sup> Calcd. for C<sub>18</sub>H<sub>22</sub>O<sub>5</sub>N<sub>2</sub>Na 369.1421; Found: 369.1422.

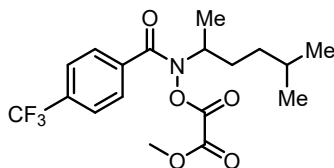

**Methyl 2-((N-(5-methylhexan-2-yl)-4-(trifluoromethyl)benzamido)oxy)-2-oxoacetate (39a)**: Prepared according to **General Procedure C** from commercially available 2-amino-5-methylhexane and *p*-trifluoromethylbenzoyl chloride. Purification by flash column chromatography (Biotage, Snap Ultra 25g, 5% to 30% EtOAc in Hexanes, 14 min). 68 % yield over three steps. Colorless oil.

**<sup>1</sup>H NMR** (500 MHz, CDCl<sub>3</sub>) δ 7.75 – 7.56 (m, 4H), 4.27 – 4.17 (m, 1H), 3.90 (s, 3H), 1.77 – 1.66 (m, 1H), 1.49 – 1.39 (m, 2H), 1.33 – 1.26 (m, 1H), 1.24 (d, *J* = 6.7 Hz, 3H), 1.14 – 1.09 (m, 1H), 0.83 (dd, *J* = 6.6, 3.4 Hz, 6H).

$^{13}\text{C}$  NMR (126 MHz,  $\text{CDCl}_3$ )  $\delta$  168.4, 156.3, 155.2, 137.0, 133.1 (q,  $J = 32.8$  Hz), 128.3, 125.7 (q,  $J = 3.7$  Hz), 123.6 (q,  $J = 272.6$  Hz), 58.5, 54.1, 35.3, 31.7, 27.8, 22.4, 22.4, 18.2.

HRMS (ESI)  $m/z$ :  $[\text{M}+\text{Na}]^+$  Calcd. for  $\text{C}_{18}\text{H}_{22}\text{O}_5\text{NF}_3\text{Na}$  412.1342; Found: 412.1345.

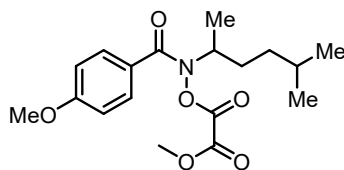

**Methyl 2-((4-methoxy-N-(5-methylhexan-2-yl)benzamido)oxy)-2-oxoacetate (40a):** Prepared according to **General Procedure C** from commercially available 2-amino-5-methylhexane and 4-methoxybenzoyl chloride. Purification by flash column chromatography (Biotage, Snap Ultra 25g, 5% to 30% EtOAc in Hexanes, 14 min). 32 % yield over three steps. White solid.

$^1\text{H}$  NMR (500 MHz,  $\text{CDCl}_3$ )  $\delta$  7.62 – 7.57 (m, 2H), 6.97 – 6.89 (m, 2H), 4.31 – 4.21 (m, 1H), 3.94 (s, 3H), 3.85 (s, 3H), 1.78 – 1.67 (m, 1H), 1.50 – 1.42 (m, 2H), 1.36 – 1.26 (m, 1H), 1.25 (d,  $J = 6.6$  Hz, 3H), 1.20 – 1.11 (m, 1H), 0.85 (d,  $J = 6.6$  Hz, 6H).

$^{13}\text{C}$  NMR (126 MHz,  $\text{CDCl}_3$ )  $\delta$  170.4, 162.4, 156.8, 155.4, 130.3, 125.4, 114.1, 59.2, 55.6, 54.0, 35.4, 31.8, 27.9, 22.6, 22.5, 18.2.

HRMS (ESI)  $m/z$ :  $[\text{M}+\text{Na}]^+$  Calcd. for  $\text{C}_{18}\text{H}_{25}\text{O}_6\text{NNa}$  374.1721; Found: 374.1722.

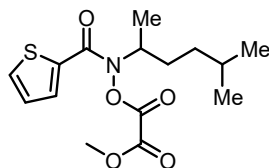

**Methyl 2-((N-(5-methylhexan-2-yl)thiophene-2-carboxamido)oxy)-2-oxoacetate (41a):** Prepared according to **General Procedure C** from commercially available 2-amino-5-methylhexane and 2-thiophenecarbonyl chloride. Purification by flash column chromatography (Biotage, Snap Ultra 25g, 5% to 30% EtOAc in Hexanes, 14 min). 25 % yield over three steps. White solid.

$^1\text{H}$  NMR (500 MHz,  $\text{CDCl}_3$ )  $\delta$  7.69 (dd,  $J = 3.8, 1.2$  Hz, 1H), 7.55 (dd,  $J = 5.0, 1.2$  Hz, 1H), 7.08 (dd,  $J = 5.0, 3.8$  Hz, 1H), 4.70 – 4.63 (m, 1H), 3.98 (s, 3H), 1.78 – 1.69 (m, 1H), 1.56 – 1.46 (m, 2H), 1.36 – 1.18 (m, 2H), 1.28 (d,  $J = 6.7$  Hz, 3H), 0.87 (d,  $J = 6.7$  Hz, 6H).

$^{13}\text{C}$  NMR (126 MHz,  $\text{CDCl}_3$ )  $\delta$  163.7, 156.6, 156.1, 134.4, 132.6, 131.8, 127.6, 58.4, 54.3, 35.5, 31.8, 28.0, 22.6, 22.6, 18.0.

HRMS (ESI)  $m/z$ :  $[\text{M}+\text{Na}]^+$  Calcd. for  $\text{C}_{15}\text{H}_{21}\text{O}_5\text{NSNa}$  350.1029; Found: 350.1029.

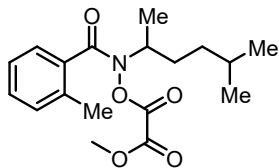

**Methyl 2-((2-methyl-N-(5-methylhexan-2-yl)benzamido)oxy)-2-oxoacetate (42a):** Prepared according to **General Procedure C** from commercially available 2-amino-5-methylhexane and 2-methylbenzoyl chloride. Purification by flash column chromatography (Biotage, Snap Ultra 25g, 10% to 20 % EtOAc in Hexanes, 14 min). 45 % yield over three steps. Light yellow oil.

**<sup>1</sup>H NMR** (400 MHz, CDCl<sub>3</sub>) δ 7.37 – 7.31 (m, 2H), 7.29 – 7.20 (m, 2H), 4.18 – 3.90 (m, 1H), 3.95 (s, 3H), 2.45 (s, 3H), 1.72 – 1.58 (m, 1H), 1.52 – 1.40 (m, 2H), 1.35 – 1.28 (m, 1H), 1.26 (d, *J* = 6.7 Hz, 3H), 1.17 – 1.07 (m, 1H), 0.87 (dd, *J* = 6.6, 4.3 Hz, 6H).

**<sup>13</sup>C NMR** (126 MHz, CDCl<sub>3</sub>) δ 168.5, 156.5, 155.3, 136.0, 133.5, 131.0, 130.2, 127.0, 125.8, 57.9, 54.0, 35.5, 31.8, 27.9, 22.5, 22.5, 19.3, 18.4.

**HRMS** (APCI) *m/z*: [M+H]<sup>+</sup> Calcd. for C<sub>18</sub>H<sub>26</sub>O<sub>5</sub>N 336.1805; Found: 336.1806.

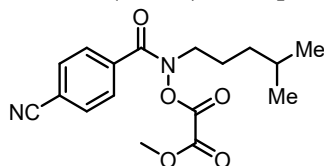

**Methyl 2-((4-cyano-N-(4-methylpentyl)benzamido)oxy)-2-oxoacetate (43a):** Prepared according to **General Procedure C** from commercially available 4-methylpentylamine and 4-cyanobenzoyl chloride. Purification by flash column chromatography (Biotage, Snap Ultra 25g, 5% to 30% EtOAc in Hexanes, 14 min). 47 % yield over three steps. White solid.

**<sup>1</sup>H NMR** (400 MHz, CDCl<sub>3</sub>) δ 7.74 – 7.64 (m, 4H), 3.91 (s, 3H), 3.76 (t, *J* = 7.4 Hz, 2H), 1.75 – 1.63 (m, 2H), 1.60 – 1.45 (m, 1H), 1.28 – 1.18 (m, 2H), 0.88 (d, *J* = 6.6 Hz, 6H).

**<sup>13</sup>C NMR** (101 MHz, CDCl<sub>3</sub>) δ 168.2, 155.9, 155.4, 137.1, 132.4, 128.7, 117.9, 115.3, 54.4, 51.1, 35.6, 27.8, 25.0, 22.5.

**HRMS** (APCI) *m/z*: [M+H]<sup>+</sup> Calcd. for C<sub>17</sub>H<sub>21</sub>O<sub>5</sub>N<sub>2</sub> 333.1445; Found: 333.1445.

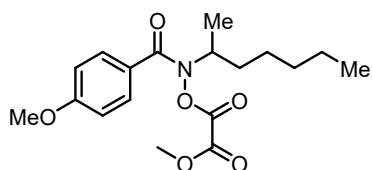

**Methyl 2-((N-(heptan-2-yl)-4-methoxybenzamido)oxy)-2-oxoacetate (44a):** Prepared according to **General Procedure C** from commercially available (±)-2-aminoheptane and 4-methoxybenzoyl chloride. Purification by flash column chromatography (Biotage, Snap Ultra 25g, 5% to 30% EtOAc in Hexanes, 14 min). 35 % yield over three steps. White solid.

**<sup>1</sup>H NMR** (500 MHz, CDCl<sub>3</sub>) δ 7.69 – 7.55 (m, 2H), 6.97 – 6.83 (m, 2H), 4.34 – 4.26 (m, 1H), 3.94 (s, 3H), 3.84 (s, 3H), 1.78 – 1.71 (m, 1H), 1.47 – 1.34 (m, 2H), 1.31 – 1.16 (m, 5H), 1.24 (d, J = 6.7 Hz, 3H), 0.85 (t, J = 7.1 Hz, 3H).

**<sup>13</sup>C NMR** (126 MHz, CDCl<sub>3</sub>) δ 170.3, 162.4, 156.7, 155.4, 130.2, 125.4, 114.0, 58.9, 55.5, 54.0, 34.0, 31.6, 26.0, 22.5, 18.1, 14.1.

**HRMS** (ESI) m/z: [M+Na]<sup>+</sup> Calcd. for C<sub>18</sub>H<sub>25</sub>O<sub>6</sub>NNa 374.1574; Found: 374.1576.

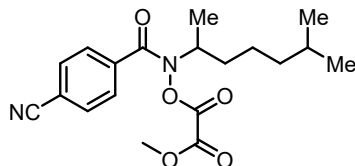

**Methyl 2-((4-cyano-N-(6-methylheptan-2-yl)benzamido)oxy)-2-oxoacetate (45a)**: Prepared according to General Procedure C from commercially available 2-amino-6-methylheptane and 4-cyanobenzoyl chloride. Purification by flash column chromatography (Biotage, Snap Ultra 25g, 5% to 30% EtOAc in Hexanes, 14 min). 45 % yield over three steps. White solid.

**<sup>1</sup>H NMR** (400 MHz, CDCl<sub>3</sub>) δ 7.72 (d, J = 8.1 Hz, 2H), 7.66 (d, J = 8.1 Hz, 2H), 4.34 – 4.23 (m, 1H), 3.92 (s, 3H), 1.75 – 1.63 (m, 1H), 1.53 – 1.30 (m, 3H), 1.28 – 1.18 (m, 1H), 1.24 (d, J = 6.6 Hz, 3H), 1.13 – 1.07 (m, 2H), 0.83 (d, J = 6.6 Hz, 6H).

**<sup>13</sup>C NMR** (126 MHz, CDCl<sub>3</sub>) δ 167.8, 156.1, 155.3, 137.7, 132.5, 128.5, 117.8, 115.1, 57.9, 54.9, 38.5, 34.0, 27.8, 24.1, 22.6, 22.5, 18.1.

**HRMS** (APCI) m/z: [M+H]<sup>+</sup> Calcd. for C<sub>19</sub>H<sub>25</sub>O<sub>5</sub>N<sub>2</sub> 361.1758; Found: 361.1758.

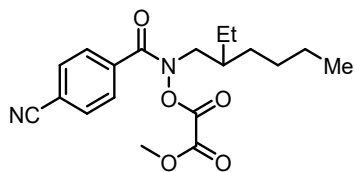

**Methyl 2-((4-cyano-N-(2-ethylhexyl)benzamido)oxy)-2-oxoacetate (46a)**: Prepared according to General Procedure C from commercially available 2-ethylhexylamine and 4-cyanobenzoyl chloride. Purification by flash column chromatography (Biotage, Snap Ultra 25g, 5% to 30% EtOAc in Hexanes, 14 min). 52 % yield over three steps. White solid.

**<sup>1</sup>H NMR** (500 MHz, CDCl<sub>3</sub>) δ 7.81 – 7.58 (m, 4H), 3.89 (s, 3H), 3.71 (d, J = 7.0 Hz, 2H), 1.77 – 1.69 (m, 1H), 1.49 – 1.17 (m, 8H), 0.86 (dt, J = 9.1, 7.3 Hz, 6H).

**<sup>13</sup>C NMR** (126 MHz, CDCl<sub>3</sub>) δ 168.3, 155.8, 155.41, 137.1, 132.3, 128.7, 117.9, 115.1, 54.3, 53.81, 37.4, 30.4, 28.5, 23.8, 23.0, 14.1, 10.5.

**HRMS** (APCI)  $m/z$ :  $[M+H]^+$  Calcd. for  $C_{19}H_{25}O_5N_2$  361.1758; Found: 361.1761.

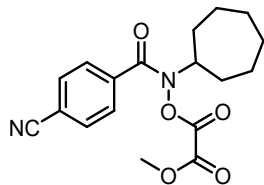

**Methyl 2-((4-cyano-N-cycloheptylbenzamido)oxy)-2-oxoacetate (47a)**: Prepared according to **General Procedure C** from commercially available cycloheptanamine and 4-cyanobenzoyl chloride. Purification by flash column chromatography (Biotage, Snap Ultra 25g, 5% to 30% EtOAc in Hexanes, 14 min). 35 % yield over three steps. White solid.

**$^1H$  NMR** (400 MHz,  $CDCl_3$ )  $\delta$  7.84 – 7.64 (m, 4H), 4.29 – 4.25 (m, 1H), 3.92 (s, 3H), 2.04 – 1.90 (m, 2H), 1.86 – 1.78 (m, 2H), 1.75 – 1.67 (m, 2H), 1.56 – 1.47 (m, 4H), 1.43 – 1.35 (m, 2H).

**$^{13}C$  NMR** (126 MHz,  $CDCl_3$ )  $\delta$  167.6, 156.2, 155.4, 137.7, 132.5, 128.4, 117.9, 115.1, 62.9, 54.3, 32.1, 28.0, 24.4.

**HRMS** (ESI)  $m/z$ :  $[M+H]^+$  Calcd. for  $C_{18}H_{21}N_2O_5$  345.1442; Found: 345.1443.

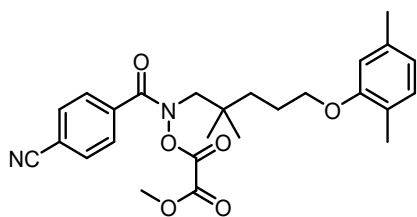

**Methyl 2-((4-cyano-N-(2,2-dimethyl-5-(2,4,5-trimethylphenoxy)pentyl)benzamido)oxy)-2-oxoacetate (48a)**: Prepared according to **General Procedure C** from 5-(2,5-Dimethylphenoxy)-2,2-dimethyl-1-pentanamine and 4-cyanobenzoyl chloride. 5-(2,5-Dimethylphenoxy)-2,2-dimethyl-1-pentanamine were synthesized according to previous literature.<sup>11</sup> Purification by flash column chromatography (Biotage, Snap Ultra 25g, 5% to 30% EtOAc in Hexanes, 14 min). 58 % yield over three steps. White solid.

**$^1H$  NMR** (400 MHz,  $CDCl_3$ )  $\delta$  7.69 (s, 4H), 7.00 (d,  $J = 7.4$  Hz, 1H), 6.66 (d,  $J = 7.5$  Hz, 1H), 6.62 (d,  $J = 1.5$  Hz, 1H), 3.93 (t,  $J = 6.3$  Hz, 2H), 3.83 (s, 3H), 3.75 – 3.67 (m, 2H), 2.30 (s, 3H), 2.16 (s, 3H), 1.84 – 1.75 (m, 2H), 1.58 – 1.45 (m, 2H), 1.06 (s, 6H)

**$^{13}C$  NMR** (101 MHz,  $CDCl_3$ )  $\delta$  169.0, 157.0, 155.8, 155.7, 136.9, 136.6, 132.2, 130.4, 128.9, 123.6, 120.9, 118.0, 115.1, 112.1, 68.3, 59.3, 54.4, 36.6, 35.5, 25.6, 24.3, 21.5, 15.9.

**HRMS** (APCI)  $m/z$ :  $[M+H]^+$  Calcd. for  $C_{26}H_{31}O_6N_2$  467.2177; Found: 467.2178.

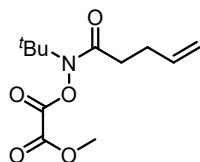

**Methyl 2-((N-(tert-butyl)pent-4-enamido)oxy)-2-oxoacetate (53a):** Prepared according to **General Procedure B** from commercially available 4-Pentenoic acid. Purification by flash column chromatography (Biotage, Snap Ultra 25g, 5% to 20% EtOAc in Hexanes, 14 min). 57 % yield over three steps. Colorless oil.

$^1\text{H NMR}$  (500 MHz,  $\text{CDCl}_3$ )  $\delta$  5.86 – 5.72 (m, 1H), 5.11 – 4.89 (m, 2H), 2.46 – 2.12 (m, 4H), 1.44 (s, 9H).

$^{13}\text{C NMR}$  (126 MHz,  $\text{CDCl}_3$ )  $\delta$  174.9, 157.4, 157.0, 137.0, 115.5, 63.7, 54.2, 33.7, 28.0, 27.5.

**HRMS** (ESI)  $m/z$ :  $[\text{M}+\text{Na}]^+$  Calcd. for  $\text{C}_{12}\text{H}_{19}\text{NO}_5\text{Na}$  280.1155; Found: 280.1156.

### 3. Additional Optimization Studies

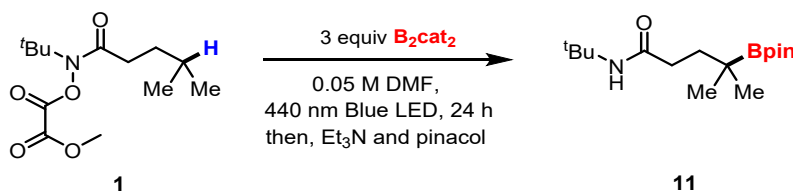

| Entry | deviations                                                   | yield (%) <sup>b</sup> |
|-------|--------------------------------------------------------------|------------------------|
| 1     | None                                                         | 98                     |
| 2     | MeCN                                                         | n.d.                   |
| 3     | THF                                                          | n.d.                   |
| 4     | DCM                                                          | n.d.                   |
| 5     | EtOAc                                                        | n.d.                   |
| 6     | 3.0 equiv. of $\text{B}_2(\text{cat})_2$ at 60 °C (no light) | n.d.                   |
| 7     | 0.25 M DMF, 5 h                                              | 25                     |
| 8     | 0.25 M DMF, 10 h                                             | 45                     |
| 9     | 0.25 M DMF, 16 h                                             | 65                     |
| 10    | 0.25 M DMF, 32 h                                             | 62                     |

<sup>a</sup> Performed with 0.1 mmol scale (0.1 mmol **1**) in 0.05 M solvent. <sup>b</sup> Yields were determined using  $^1\text{H NMR}$  analysis with 1,3,5-trimethoxybenzene (Ar-H) as internal standard.

## 4. C(sp<sup>3</sup>)-H bonds Borylation

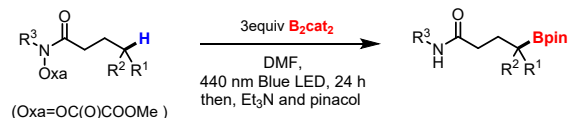

**General procedure D:** To a flame-dried reaction tube equipped with a stir bar was charged B<sub>2</sub>cat<sub>2</sub> (3.0 equiv.). The tube was capped with a rubber septum. After the tube was evacuated and backfilled with nitrogen 5 times, O-oxalate hydroxamic esters (0.1 mmol, 1.0 equiv.) and DMF (0.05 M or 0.025 M) were added via a syringe. The resultant reaction mixture was stirred under Blue LED (45 W, 440 nm) irradiation for 24 - 48 h. After the reaction was complete as monitored by TLC, a solution of pinacol (2.0 equiv. based on B<sub>2</sub>cat<sub>2</sub>) in Et<sub>3</sub>N (1.0 mL) was added via a syringe. The mixture was stirred for an additional 1 h at room temperature. After that, the reaction mixture was partitioned between EtOAc and water. The organic layer was collected, washed with an aqueous solution of NH<sub>4</sub>Cl, dried over MgSO<sub>4</sub>, and concentrated under reduced pressure. The resulting reaction mixture was purified via flash chromatography on silica gel with an appropriate gradient of eluent to give the desired product.

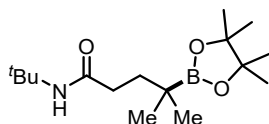

***N*-(tert-butyl)-4-methyl-4-(4,4,5,5-tetramethyl-1,3,2-dioxaborolan-2-yl)pentanamide (11):** Purification by flash column chromatography (Biotage, Yamazen universal column 16g, 2 % to 20 % EtOAc in hexanes, 14 min). 29 mg, 98 % yield. White solid.

**<sup>1</sup>H NMR:** (500 MHz, CDCl<sub>3</sub>) δ 5.30 (s, 1H), 2.17–1.93 (m, 2H), 1.63–1.50 (m, 2H), 1.34 (s, 9H), 1.23 (s, 12H), 0.93 (s, 6H).

**<sup>13</sup>C NMR:** (126 MHz, CDCl<sub>3</sub>) δ 173.3, 83.2, 51.1, 36.9, 35.2, 29.9, 29.0, 24.9, 24.7. (The carbon attached to boron was not observed due to quadrupolar relaxation).

**HRMS (ESI) m/z:** [M+H]<sup>+</sup> Calcd. for C<sub>16</sub>H<sub>33</sub>BNO<sub>3</sub> 298.2548; Found: 298.2549.

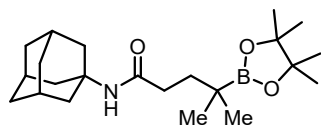



***N-((3*s*,5*s*,7*s*)-adamantan-1-yl)-4-methyl-4-(4,4,5,5-tetramethyl-1,3,2-dioxaborolan-2-yl)pentanamide (12)***: Purification by flash column chromatography (Biotage, Yamazen universal column 16g, 2 % to 20 % EtOAc in hexanes , 14 min). 22 mg, 57 % yield. White solid.

**<sup>1</sup>H NMR**: (500 MHz, CDCl<sub>3</sub>) δ 5.16 (s, 1H), 2.08 – 2.04 (m, 5H), 2.01 – 1.97 (m, 6H), 1.68 – 1.66 (m, 6H), 1.59 – 1.54 (m, 2H), 1.23 (s, 12H), 0.92 (s, 6H).

**<sup>13</sup>C NMR**: (126 MHz, CDCl<sub>3</sub>) δ 173.2, 83.2, 51.8, 41.9, 36.9, 36.6, 35.4, 29.6, 24.9, 24.7.

**HRMS** (ESI) *m/z*: [M+H]<sup>+</sup> Calcd. for C<sub>22</sub>H<sub>39</sub>O<sub>3</sub>NB 376.3018; Found: 376.3021.

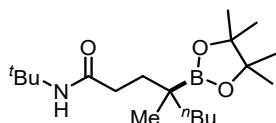

***N-(tert-butyl)-4-methyl-4-(4,4,5,5-tetramethyl-1,3,2-dioxaborolan-2-yl)octanamide (13)***: Purification by flash column chromatography (Biotage, Yamazen universal column 16g, 2 % to 20 % EtOAc in hexanes, 14 min). 24 mg, 70 % yield. White solid.

**<sup>1</sup>H NMR**: (500 MHz, CDCl<sub>3</sub>) δ 5.29 (s, 1H), 2.11–2.00 (m, 2H), 1.72–1.66 (m, 1H), 1.54–1.45 (m, 1H), 1.34 (s, 9H), 1.30–1.16 (m, 6H), 1.23(s, 12H), 0.89 (s, 3H), 0.87 (t, *J* = 7.2 Hz, 3H).

**<sup>13</sup>C NMR**: (101 MHz, CDCl<sub>3</sub>) δ 173.5, 83.2, 51.1, 38.8, 34.9, 34.7, 29.0, 28.1, 25.0, 23.7, 21.5, 14.3. (The carbon attached to boron was not observed due to quadrupolar relaxation).

**HRMS** (ESI) *m/z*: [M+H]<sup>+</sup> Calcd. for C<sub>19</sub>H<sub>39</sub>BNO<sub>3</sub> 340.3018; Found: 340.3018.

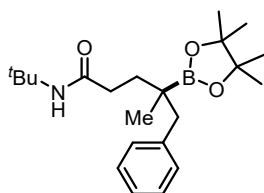

***N-(tert-butyl)-4-methyl-5-phenyl-4-(4,4,5,5-tetramethyl-1,3,2-dioxaborolan-2-yl)pentanamide (14)***: Purification by flash column chromatography (Biotage, Yamazen universal column 16g, 2 % to 20 % EtOAc in hexanes , 14 min). 20 mg, 53 % yield. White solid.

**<sup>1</sup>H NMR**: (500 MHz, CDCl<sub>3</sub>) δ 7.25–7.15 (m, 5H), 5.27 (s, 1H), 2.74 (d, *J* = 13.1 Hz, 1H), 2.55 (d, *J* = 13.1 Hz, 1H), 2.18–2.08 (m, 2H), 1.80–1.71 (m, 1H), 1.56–1.51 (m, 1H), 1.33 (s, 9H), 1.21 (d, *J* = 13.2 Hz, 12H), 0.91 (s, 3H).

**<sup>13</sup>C NMR**: (126MHz, CDCl<sub>3</sub>) δ 173.2, 139.8, 130.5, 127.9, 126.0, 83.5, 51.1, 44.7, 35.0, 34.8, 29.0, 25.2, 25.0, 21.5. (The carbon attached to boron was not observed due to quadrupolar relaxation).

**HRMS** (ESI) *m/z*: [M+H]<sup>+</sup> Calcd. for C<sub>22</sub>H<sub>37</sub>BNO<sub>3</sub> 374.2861; Found: 374.2860.

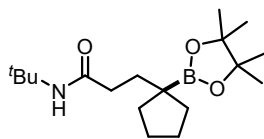

***N*-(tert-butyl)-3-(1-(4,4,5,5-tetramethyl-1,3,2-dioxaborolan-2-yl)cyclopentyl)propanamide (15):** Purification by flash column chromatography (Biotage, Yamazen universal column 16g, 2 % to 20 % EtOAc in hexanes , 14 min). 22 mg, 67 % yield. White solid.

**<sup>1</sup>H NMR:** (500 MHz, CDCl<sub>3</sub>) δ 5.34 (s, 1H), 2.11–2.03 (m, 2H), 1.82–1.73 (m, 2H), 1.68–1.58 (m, 6H), 1.58 – 1.49 (m, 2H), 1.34 (s, 9H), 1.23 (s, 12H).

**<sup>13</sup>C NMR:** (126 MHz, CDCl<sub>3</sub>) δ 173.3, 83.2, 51.1, 36.7, 35.3, 34.6, 29.0, 25.4, 24.9. (The carbon attached to boron was not observed due to quadrupolar relaxation).

**HRMS (ESI) m/z:** [M+H]<sup>+</sup> Calcd. for C<sub>18</sub>H<sub>35</sub>BNO<sub>3</sub> 324.2705; Found: 324.2706.

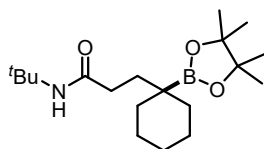

***N*-(tert-Butyl)-4-methyl-4-(4-(methylsulfonyl)phenyl)pentanamide (16):** Purification by flash column chromatography (Biotage, Yamazen universal column 16g, 2 % to 20 % EtOAc in hexanes , 14 min). 17 mg, 52 % yield. White solid.

**<sup>1</sup>H NMR:** (600 MHz, CDCl<sub>3</sub>) δ 5.22 (s, 1H), 2.09–2.02 (m, 2H), 1.86–1.82 (m, 2H), 1.66–1.53 (m, 6H), 1.33 (s, 9H), 1.29–1.27 (m, 1H), 1.25 (s, 12H), 1.18–1.11(m, 1H), 0.96–0.90 (m, 2H).

**<sup>13</sup>C NMR:** (151 MHz, CDCl<sub>3</sub>) δ 173.2, 83.2, 51.1, 36.4, 35.0, 34.4, 29.0, 26.7, 25.2, 25.0. (The carbon attached to boron was not observed due to quadrupolar relaxation).

**HRMS (ESI) m/z:** [M+H]<sup>+</sup> Calcd. for C<sub>19</sub>H<sub>37</sub>BNO<sub>3</sub> 338.2861; Found: 338.2864.

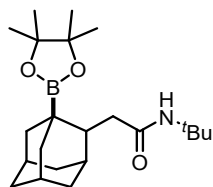

17, 81%

***N*-(tert-butyl)-2-((1S,2S,5S)-1-(4,4,5,5-tetramethyl-1,3,2-dioxaborolan-2-yl)adamantan-2-yl)acetamide (17):** Purification by flash column chromatography (Biotage, Yamazen universal column 16g, 2 % to 20 % EtOAc in hexanes , 14 min). 30 mg, 81 % yield. White solid.

**<sup>1</sup>H NMR** (500 MHz, CDCl<sub>3</sub>) 5.55 (s, 1H), 2.29 (dd, *J* = 13.3, 10.7 Hz, 1H), 2.15 (d, *J* = 11.1 Hz, 1H), 2.07 (dd, *J* = 13.3, 2.8 Hz, 1H), 1.94 – 1.70 (m, 11H), 1.63 (d, *J* = 10.6 Hz, 1H), 1.55 (dd, *J* = 12.9, 2.7 Hz, 1H), 1.34 (s, 9H), 1.22 (s, 12H).

**<sup>13</sup>C NMR** (126 MHz, CDCl<sub>3</sub>) δ 173.1, 83.1, 51.0, 43.2, 41.6, 40.1, 38.9, 38.1, 32.5, 31.5, 29.9, 29.1, 27.3, 27.2, 25.0, 24.8. (The carbon attached to boron was not observed due to quadrupolar relaxation).

**HRMS** (ESI) *m/z*: [M+H]<sup>+</sup> Calcd. for C<sub>22</sub>H<sub>39</sub>BNO<sub>3</sub> 376.3018; Found: 376.3020.

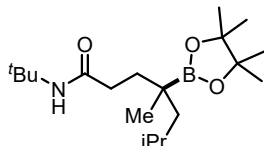

***N*-(tert-butyl)-4,6-dimethyl-4-(4,4,5,5-tetramethyl-1,3,2-dioxaborolan-2-yl)heptanamide (18):** Purification by flash column chromatography (Biotage, Yamazen universal column 16g, 2 % to 20 % EtOAc in hexanes, 14 min). 25 mg, 74 % yield. White solid.

**<sup>1</sup>H NMR** (500 MHz, CDCl<sub>3</sub>) δ 5.27 (s, 1H), 2.11 – 2.01 (m, 2H), 1.71 – 1.61 (m, 2H), 1.54 – 1.47 (m, 1H), 1.33 (s, 9H), 1.33 – 1.29 (m, 1H), 1.23 (s, 12H), 1.17 (dd, *J* = 13.6, 6.4 Hz, 1H), 0.90 (s, 3H), 0.89 – 0.86 (m, 6H).

**<sup>13</sup>C NMR** (126 MHz, CDCl<sub>3</sub>) δ 173.5, 83.3, 51.1, 48.0, 35.4, 34.2, 29.0, 25.7, 25.1, 25.1, 24.5, 24.2, 21.9. (The carbon attached to boron was not observed due to quadrupolar relaxation).

**HRMS** (ESI) *m/z*: [M+H]<sup>+</sup> Calcd. for C<sub>19</sub>H<sub>39</sub>BNO<sub>3</sub> 340.3018; Found: 340.3019.

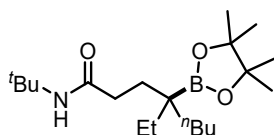

***N*-(tert-butyl)-4-ethyl-4-(4,4,5,5-tetramethyl-1,3,2-dioxaborolan-2-yl)octanamide (19):** Purification by flash column chromatography (Biotage, Yamazen universal column 16g, 2 % to 20 % EtOAc in hexanes, 14 min). 18 mg, 51 % yield. White solid.

**<sup>1</sup>H NMR** (400 MHz, CDCl<sub>3</sub>) δ 5.29 (s, 1H), 2.06 – 1.94 (m, 2H), 1.67 – 1.61 (m, 2H), 1.34 (s, 9H), 1.41 – 1.13 (m, 8H), 1.23 (s, 12H), 0.88 (t, *J* = 7.1 Hz, 3H), 0.81 (t, *J* = 7.5 Hz, 3H).

**<sup>13</sup>C NMR** (126 MHz, CDCl<sub>3</sub>) δ 173.6, 83.2, 51.1, 34.0, 33.8, 29.9, 29.0, 27.1, 26.9, 25.1, 23.8, 14.3, 9.3. (The carbon attached to boron was not observed due to quadrupolar relaxation).

**HRMS** (ESI) *m/z*: [M+H]<sup>+</sup> Calcd. for : C<sub>20</sub>H<sub>41</sub>BNO<sub>3</sub> 354.3174; Found: 354.3173.

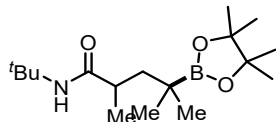

***N*-(tert-butyl)-2,4-dimethyl-4-(4,4,5,5-tetramethyl-1,3,2-dioxaborolan-2-yl)pentanamide (20):** Purification by flash column chromatography (Biotage, Yamazen universal column 16g, 2 % to 20 % EtOAc in hexanes, 14 min). 16 mg, 51 % yield. White solid.

**<sup>1</sup>H NMR** (400 MHz, CDCl<sub>3</sub>) δ 5.57 (s, 1H), 2.07 (q, *J* = 6.4 Hz, 1H), 1.69 (q, *J* = 6.4 Hz, 1H), 1.34 (s, 9H), 1.33 – 1.30 (m, 1H), 1.24 (d, *J* = 2.3 Hz, 12H), 1.09 (d, *J* = 6.8 Hz, 3H), 0.94 (s, 3H), 0.92 (s, 3H).

**<sup>13</sup>C NMR** (101 MHz, CDCl<sub>3</sub>) δ 177.0, 83.3, 50.8, 45.3, 40.4, 29.0, 26.1, 24.9, 24.6, 19.5. (The carbon attached to boron was not observed due to quadrupolar relaxation).

**HRMS** (ESI) *m/z*: [M+H]<sup>+</sup> Calcd. for C<sub>17</sub>H<sub>35</sub>BNO<sub>3</sub> 312.2705; Found: 312.2707.

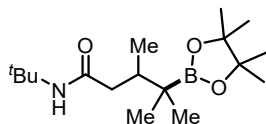

***N*-(tert-butyl)-3,4-dimethyl-4-(4,4,5,5-tetramethyl-1,3,2-dioxaborolan-2-yl)pentanamide (21):** Purification by flash column chromatography (Biotage, Yamazen universal column 16g, 2 % to 20 % EtOAc in hexanes, 14 min). 14 mg, 46 % yield. White solid.

**<sup>1</sup>H NMR** (500 MHz, CDCl<sub>3</sub>) δ 5.37 (s, 1H), 2.25 (d, *J* = 15.9 Hz, 1H), 1.91 – 1.85 (m, 1H), 1.71 (dd, *J* = 13.3, 11.0 Hz, 1H), 1.34 (s, 9H), 1.23 (s, 12H), 0.90 (s, 3H), 0.88 (s, 6H).

**<sup>13</sup>C NMR** (126 MHz, CDCl<sub>3</sub>) δ 173.3, 83.2, 51.1, 42.3, 38.4, 29.0, 24.9, 24.8, 21.9, 21.4, 15.4. (The carbon attached to boron was not observed due to quadrupolar relaxation).

**HRMS** (ESI) *m/z*: [M+H]<sup>+</sup> Calcd. for C<sub>17</sub>H<sub>35</sub>BNO<sub>3</sub> 312.2706; Found: 312.2705.

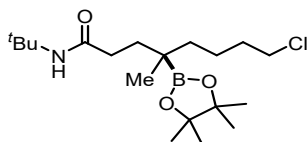

***(S)*-N-(tert-butyl)-8-chloro-4-methyl-4-(4,4,5,5-tetramethyl-1,3,2-dioxaborolan-2-yl)octanamide (22):** Purification by flash column chromatography (Biotage, Yamazen universal column 16g, 2 % to 20 % EtOAc in hexanes, 14 min). 21 mg, 56 % yield. White solid.

**<sup>1</sup>H NMR** (500 MHz, CDCl<sub>3</sub>) δ 5.28 (s, 1H), 3.52 (t, *J* = 6.7 Hz, 2H), 2.14 – 1.84 (m, 2H), 1.82 – 1.65 (m, 3H), 1.54 – 1.46 (m, 1H), 1.42 – 1.18 (m, 4H), 1.33 (s, 9H), 1.22 (s, 12H), 0.90 (s, 3H).

$^{13}\text{C}$  NMR (126 MHz,  $\text{CDCl}_3$ )  $\delta$  173.2, 83.3, 51.1, 45.2, 38.2, 34.7, 34.5, 33.5, 29.0, 25.0, 23.2, 21.4. (The carbon attached to boron was not observed due to quadrupolar relaxation).

HRMS (ESI)  $m/z$ :  $[\text{M}+\text{H}]^+$  Calcd. for  $\text{C}_{19}\text{H}_{38}\text{BClNO}_3$  374.2628; Found: 374.2628.

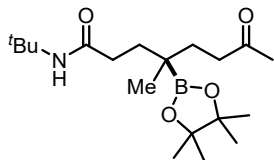

**(S)-N-(tert-butyl)-4-methyl-7-oxo-4-(4,4,5,5-tetramethyl-1,3,2-dioxaborolan-2-yl)octanamide (23)**: Purification by flash column chromatography (Biotage, Yamazen universal column 16g, 2 % to 20 % EtOAc in hexanes, 14 min). 19 mg, 54 % yield. White solid.

$^1\text{H}$  NMR (600 MHz,  $\text{CDCl}_3$ )  $\delta$  5.31 (s, 1H), 2.45 – 2.35 (m, 2H), 2.12 (s, 3H), 2.07 – 2.02 (m, 2H), 1.66 – 1.56 (m, 2H), 1.56 – 1.46 (m, 2H), 1.32 (s, 9H), 1.21 (s, 12H), 0.89 (s, 3H).

$^{13}\text{C}$  NMR (151 MHz,  $\text{CDCl}_3$ )  $\delta$  209.6, 173.0, 83.4, 51.1, 40.1, 34.2, 34.2, 31.9, 30.0, 29.0, 24.9, 24.9, 21.4. (The carbon attached to boron was not observed due to quadrupolar relaxation).

HRMS (ESI)  $m/z$ :  $[\text{M}+\text{H}]^+$  Calcd. for  $\text{C}_{19}\text{H}_{37}\text{BNO}_4$  354.2810; Found: 354.2811.

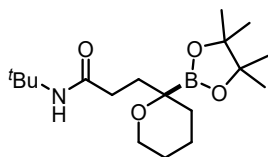

**(S)-N-(tert-butyl)-3-(2-(4,4,5,5-tetramethyl-1,3,2-dioxaborolan-2-yl)tetrahydro-2H-pyran-2-yl)propanamide (24)**: Purification by flash column chromatography (Biotage, Yamazen universal column 16g, 2 % to 20 % EtOAc in hexanes, 14 min). 19 mg, 58 % yield. White solid.

$^1\text{H}$  NMR (500 MHz,  $\text{CDCl}_3$ )  $\delta$  5.86 (s, 1H), 3.92 – 3.82 (m, 1H), 3.72 – 3.54 (m, 1H), 2.42 – 2.28 (m, 1H), 2.21 – 2.10 (m, 1H), 1.86 – 1.76 (m, 5H), 1.52 – 1.45 (m, 2H), 1.43 – 1.37 (m, 1H), 1.31 (s, 9H), 1.29 (d,  $J = 2.2$  Hz, 12H).

$^{13}\text{C}$  NMR (126 MHz,  $\text{CDCl}_3$ )  $\delta$  172.9, 84.3, 65.7, 51.0, 34.8, 33.9, 33.4, 28.9, 26.4, 25.1, 24.9, 22.5. (The carbon attached to boron was not observed due to quadrupolar relaxation).

HRMS (ESI)  $m/z$ :  $[\text{M}+\text{H}]^+$  Calcd. for  $\text{C}_{18}\text{H}_{35}\text{BNO}_4$  340.2654; Found: 340.2654.

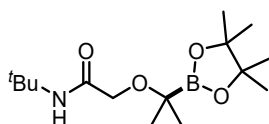

*N-(tert-butyl)-2-((2-(4,4,5,5-tetramethyl-1,3,2-dioxaborolan-2-yl)propan-2-yl)oxy)acetamide (25)*: Purification by flash column chromatography (Biotage, Yamazen universal column 16g, 2 % to 20 % EtOAc in hexanes, 14 min). 23mg, 75 % yield. White solid.

$^1\text{H NMR}$  (500 MHz,  $\text{CDCl}_3$ )  $\delta$  6.61 (s, 1H), 3.78 (s, 2H), 1.37 (s, 9H), 1.25 (s, 12H), 1.23 (s, 6H).

$^{13}\text{C NMR}$  (126 MHz,  $\text{CDCl}_3$ )  $\delta$  170.2, 84.3, 65.6, 50.7, 28.9, 24.8, 24.1. (The carbon attached to boron was not observed due to quadrupolar relaxation).

**HRMS** (ESI)  $m/z$ :  $[\text{M}+\text{H}]^+$  Calcd. for  $\text{C}_{15}\text{H}_{31}\text{BNO}_4$  300.2341; Found: 300.2342.

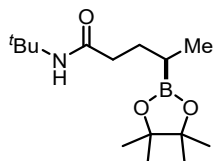

*(R)-N-(tert-butyl)-4-(4,4,5,5-tetramethyl-1,3,2-dioxaborolan-2-yl)pentanamide (26)*: Purification by flash column chromatography (Biotage, Yamazen universal column 16g, 2 % to 20 % EtOAc in hexanes, 14 min). 21mg, 75 % yield. White solid.

$^1\text{H NMR}$  (500 MHz,  $\text{CDCl}_3$ )  $\delta$  5.46 (s, 1H), 2.19 – 2.05 (m, 2H), 1.72 – 1.59 (m, 2H), 1.34 (s, 9H), 1.24 (s, 12H), 1.05 – 0.99 (m, 1H), 0.97 (d,  $J = 6.7$  Hz, 3H).

$^{13}\text{C NMR}$  (101 MHz,  $\text{CDCl}_3$ )  $\delta$  173.0, 83.2, 51.1, 37.5, 29.7, 29.0, 25.0, 25.0, 15.7. (The carbon attached to boron was not observed due to quadrupolar relaxation).

**HRMS** (ESI)  $m/z$ :  $[\text{M}+\text{H}]^+$  Calcd. for  $\text{C}_{15}\text{H}_{31}\text{BNO}_3$  284.2392; Found: 284.2394.

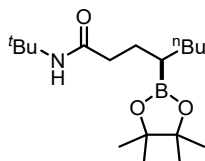

*(R)-N-(tert-butyl)-4-(4,4,5,5-tetramethyl-1,3,2-dioxaborolan-2-yl)octanamide (27)*: Purification by flash column chromatography (Biotage, Yamazen universal column 16g, 2 % to 20 % EtOAc in hexanes, 14 min). 23mg, 71 % yield. White solid.

$^1\text{H NMR}$  (400 MHz,  $\text{CDCl}_3$ )  $\delta$  5.49 (s, 1H), 2.16 – 2.08 (m, 2H), 1.75 – 1.68 (m, 1H), 1.68 – 1.61 (m, 1H), 1.47 – 1.40 (m, 1H), 1.34 (s, 9H), 1.32 – 1.25 (m, 5H), 1.25 (d,  $J = 1.4$  Hz, 12H), 1.01 – 0.94 (m, 1H), 0.87 (t,  $J = 6.9$  Hz, 3H).

$^{13}\text{C NMR}$  (126 MHz,  $\text{CDCl}_3$ )  $\delta$  172.9, 83.2, 51.1, 37.8, 31.5, 31.1, 29.0, 27.8, 25.2, 25.0, 23.1, 14.2. (The carbon attached to boron was not observed due to quadrupolar relaxation).

**HRMS** (ESI)  $m/z$ :  $[\text{M}+\text{H}]^+$  Calcd. for  $\text{C}_{18}\text{H}_{35}\text{BNO}_3$  324.2705; Found: 324.2707.

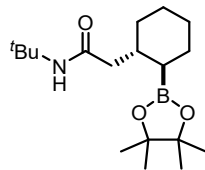

***N*-(tert-butyl)-2-2-(4,4,5,5-tetramethyl-1,3,2-dioxaborolan-2-yl)cyclohexylacetamide (trans) (28):** Purification by flash column chromatography (Biotage, Yamazen universal column 16g, 2 % to 20 % EtOAc in hexanes, 14 min). 23mg, 69 % yield. White solid.

**<sup>1</sup>H NMR** (500 MHz, CDCl<sub>3</sub>) δ. 5.66 (s, 1H), 2.22 (dd, *J* = 13.1, 3.5 Hz, 1H), 1.85 – 1.79 (m, 2H), 1.73 – 1.66 (m, 4H), 1.34 (s, 9H), 1.31 – 1.25 (m, 2H), 1.24 (d, *J* = 3.5 Hz, 12H), 1.18 – 1.10 (m, 1H), 1.07 – 0.99 (m, 1H), 0.81 – 0.72 (m, 1H).

**<sup>13</sup>C NMR** (126 MHz, CDCl<sub>3</sub>) 172.0, 83.2, 51.1, 45.6, 36.8, 33.1, 29.0, 28.1, 26.9, 26.3, 25.0, 24.9. (The carbon attached to boron was not observed due to quadrupolar relaxation).

**HRMS** (ESI) *m/z*: [M+H]<sup>+</sup> Calcd. for C<sub>18</sub>H<sub>37</sub>BNO<sub>3</sub> 326.2861; Found: 326.2863.

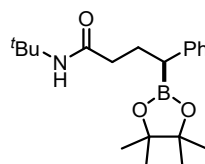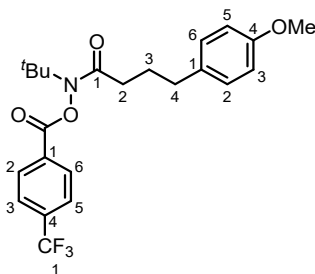

*N*-(tert-butyl)-4-(4-methoxyphenyl)-*N*-((4-(trifluoromethyl)benzoyl)oxy)butanamide

***N*-(tert-butyl)-4-phenyl-4-(4,4,5,5-tetramethyl-1,3,2-dioxaborolan-2-yl)butanamide (29):** Modifying from **General Procedure D** by replacing corresponding *O*-oxalate hydroxamic esters with *N*-(tert-butyl)-4-phenyl-*N*-((4-(trifluoromethyl)benzoyl)oxy)butanamide. The resultant reaction mixture was stirred under Blue LED (45 W, 440 nm) irradiation for 48 h. Purification by flash column chromatography (Biotage, Yamazen universal column 16g, 2 % to 20 % EtOAc in hexanes, 14 min). 20mg, 58 % yield. White solid.

**<sup>1</sup>H NMR** (500 MHz, CDCl<sub>3</sub>) δ 7.30 – 7.25 (m, 2H), 7.23 – 7.13 (m, 3H), 5.18 (s, 1H), 2.31 (t, *J* = 7.6 Hz, 1H), 2.19 – 2.15 (m, 1H), 2.07 – 1.94 (m, 3H), 1.34 (s, 9H), 1.21 (d, *J* = 11.2 Hz, 12H).

**<sup>13</sup>C NMR** (126 MHz, CDCl<sub>3</sub>) δ 172.4, 142.5, 128.7, 128.6, 125.6, 83.6, 51.2, 37.1, 29.0, 28.5, 24.8, 24.8. (The carbon attached to boron was not observed due to quadrupolar relaxation).

**HRMS** (ESI) *m/z*: [M+H]<sup>+</sup> Calcd. for C<sub>20</sub>H<sub>33</sub>BNO<sub>3</sub> 346.2550; Found: 346.2548.

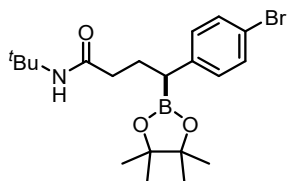

**4-(4-bromophenyl)-N-(tert-butyl)-4-(4,4,5,5-tetramethyl-1,3,2-dioxaborolan-2-yl)butanamide (30):** Modifying from **General Procedure D** by replacing corresponding *O*-oxalate hydroxamic esters with 4-(4-bromophenyl)-*N*-(tert-butyl)-*N*-((4-(trifluoromethyl)benzoyl)oxy)butanamide. The resultant reaction mixture was stirred under Blue LED (45 W, 440 nm) irradiation for 48 h. Purification by flash column chromatography (Biotage, Yamazen universal column 16g, 2 % to 20 % EtOAc in hexanes, 14 min). 21mg, 51 % yield. White solid.

**<sup>1</sup>H NMR** (500 MHz, CDCl<sub>3</sub>) δ 7.37 (d, *J* = 8.0 Hz, 2H), 7.06 (d, *J* = 8.0 Hz, 2H), 5.17 (s, 1H), 2.28 – 2.22 (m, 1H), 2.17 – 2.07 (m, 1H), 2.02 – 1.95 (m, 2H), 1.95 – 1.85 (m, 1H), 1.32 (s, 9H), 1.19 (d, *J* = 8.2 Hz, 12H).

**<sup>13</sup>C NMR** (126 MHz, CDCl<sub>3</sub>) δ 172.2, 141.7, 132.1, 131.6, 130.4, 129.8, 119.3, 83.7, 51.3, 36.9, 29.0, 28.2, 24.8, 24.8. (The carbon attached to boron was not observed due to quadrupolar relaxation).

**HRMS** (ESI) *m/z*: [M+H]<sup>+</sup> Calcd. for C<sub>20</sub>H<sub>32</sub>BBrNO<sub>3</sub> 424.1653; Found: 424.1656.

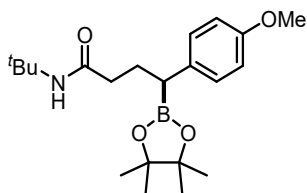

***N*-(tert-butyl)-4-(4-methoxyphenyl)-4-(4,4,5,5-tetramethyl-1,3,2-dioxaborolan-2-yl)butanamide (31):** Modifying from **General Procedure D** by replacing corresponding *O*-oxalate hydroxamic esters with *N*-(tert-butyl)-4-(4-methoxyphenyl)-*N*-((4-(trifluoromethyl)benzoyl)oxy)butanamide. The resultant reaction mixture was stirred under Blue LED (45 W, 440 nm) irradiation for 48 h. Purification by flash column chromatography (Biotage, Yamazen universal column 16g, 2 % to 20 % EtOAc in hexanes, 14 min). 30mg, 78 % yield. White solid.

**<sup>1</sup>H NMR** (500 MHz, CDCl<sub>3</sub>) δ 7.13 – 7.07 (m, 2H), 6.83 – 6.77 (m, 2H), 5.16 (s, 1H), 3.78 (s, 3H), 2.25 – 2.20 (m, 1H), 2.16 – 2.07 (m, 1H), 2.05 – 1.95 (m, 2H), 1.94 – 1.86 (m, 1H), 1.31 (s, 9H), 1.19 (d, *J* = 10.5 Hz, 12H).

**<sup>13</sup>C NMR** (126 MHz, CDCl<sub>3</sub>) δ. 172.5, 157.7, 134.4, 129.6, 114.0, 83.5, 55.3, 51.1, 37.0, 29.0, 28.7, 24.8, 24.8. (The carbon attached to boron was not observed due to quadrupolar relaxation).

**HRMS** (ESI) *m/z*: [M+H]<sup>+</sup> Calcd. for C<sub>21</sub>H<sub>35</sub>BNO<sub>4</sub> 376.2654; Found: 376.2653.



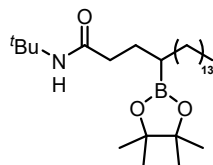

***N*-(tert-butyl)-5-(4,4,5,5-tetramethyl-1,3,2-dioxaborolan-2-yl)octadecanamide (32):** Purification by flash column chromatography (Biotage, Yamazen universal column 16g, 2 % to 20 % EtOAc in hexanes , 14 min). 25mg, 54 % yield. White solid.

**<sup>1</sup>H NMR** (500 MHz, CDCl<sub>3</sub>) δ 5.49 (s, 1H), 2.15 – 2.03 (m, 2H), 1.73 – 1.58 (m, 3H), 1.34 (s, 9H), 1.30 – 1.18 (m, 25H), 1.24 (s, 12H), 1.00 – 0.95 (m, 1H), 0.88 (t, *J* = 6.9 Hz, 3H).

**<sup>13</sup>C NMR** (126 MHz, CDCl<sub>3</sub>) δ 172.9, 83.2, 51.1, 37.8, 32.1, 31.4, 30.0, 29.9, 29.8, 29.8, 29.8, 29.7, 29.5, 29.3, 29.0, 27.8, 25.0, 22.8, 14.3.

**HRMS** (APCI) *m/z*: [M+H]<sup>+</sup> Calcd. for C<sub>28</sub>H<sub>57</sub>O<sub>3</sub>NB 466.4426; Found: 466.4433.

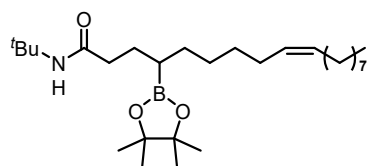

***N*-(tert-butyl)-4-(4,4,5,5-tetramethyl-1,3,2-dioxaborolan-2-yl)octadec-9-enamide (33):** Purification by flash column chromatography (Biotage, Yamazen universal column 16g, 2 % to 20 % EtOAc in hexanes , 14 min). 13mg, 28 % yield. White solid.

**<sup>1</sup>H NMR** (500 MHz, CDCl<sub>3</sub>) δ 5.47 (s, 1H), 5.39 – 5.26 (m, 2H), 2.16 – 2.02 (m, 2H), 2.00 (q, *J* = 6.2 Hz, 4H), 1.75 – 1.60 (m, 2H), 1.34 (s, 9H), 1.32 – 1.20 (m, 18H), 1.25 (s, 12H), 1.01 – 0.94 (m, 1H), 0.88 (t, *J* = 6.7 Hz, 3H).

**<sup>13</sup>C NMR** (126 MHz, CDCl<sub>3</sub>) δ 172.9, 130.1, 129.9, 83.2, 51.1, 37.7, 32.1, 31.3, 30.2, 29.9, 29.9, 29.7, 29.5, 29.5, 29.0, 27.8, 27.4, 27.3, 25.0, 22.8, 14.3.

**HRMS** (ESI) *m/z*: [M+Na]<sup>+</sup> Calcd. for C<sub>28</sub>H<sub>54</sub>O<sub>3</sub>NBNa 486.4089; Found: 486.4093.

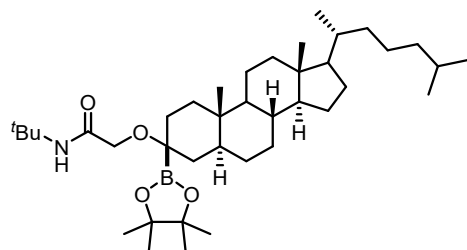

***(S)*-4-(4-bromophenyl)-N-(tert-butyl)-4-(4,4,5,5-tetramethyl-1,3,2-dioxaborolan-2-yl)butanamide (34):** Purification by flash column chromatography (Biotage, Yamazen universal column 16g, 2 % to 20 % EtOAc in hexanes , 14 min). 40mg, 64 % yield. White solid.

**<sup>1</sup>H NMR** (500 MHz, CDCl<sub>3</sub>) δ 6.73 (s, 1H), 3.75 (s, 2H), 1.96 (dd, *J* = 12.9, 3.6 Hz, 1H), 1.83 – 1.24 (m, 15H), 1.38 (s, 9H), 1.22 (s, 12H), 1.20 – 0.94 (m, 14H), 0.89 (d, *J* = 6.4 Hz, 3H), 0.86 (d, *J* = 6.6 Hz, 6H), 0.80 (s, 3H), 0.70 – 0.66 (m, 1H), 0.64 (s, 3H).

**<sup>13</sup>C NMR** (126 MHz, CDCl<sub>3</sub>) δ 170.2, 84.1, 65.7, 56.8, 56.4, 55.0, 50.7, 42.8, 40.2, 39.7, 39.7, 36.3, 35.9, 35.86, 35.7, 33.7, 32.9, 32.4, 29.0, 28.5, 28.4, 28.2, 27.0, 24.8, 24.8, 24.3, 24.0, 23.0, 22.7, 20.9, 18.8, 12.25, 11.86. (The carbon attached to boron was not observed due to quadrupolar relaxation).

**HRMS** (ESI) *m/z*: [M+Na]<sup>+</sup> Calcd. for C<sub>39</sub>H<sub>70</sub>O<sub>4</sub>NBNa 650.5297; Found: 650.5295.

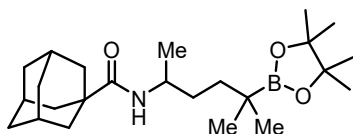

**(3*r*,5*r*,7*r*)-*N*-(5-methyl-5-(4,4,5,5-tetramethyl-1,3,2-dioxaborolan-2-yl)hexan-2-yl)adamantane-1-carboxamide (36):** Purification by flash column chromatography (Biotage, Yamazen universal column 16g, 2 % to 20 % EtOAc in hexanes, 14 min). 23mg, 58 % yield. White solid.

**<sup>1</sup>H NMR** (500 MHz, CDCl<sub>3</sub>) δ 5.39 (d, *J* = 8.1 Hz, 1H), 3.90 – 3.82 (m, 1H), 2.13 – 1.98 (m, 3H), 1.87 – 1.80 (m, 6H), 1.77 – 1.65 (m, 6H), 1.46 – 1.40 (m, 1H), 1.33 – 1.24 (m, 3H), 1.22 (d, *J* = 2.1 Hz, 12H), 1.09 (d, *J* = 6.5 Hz, 3H), 0.91 (s, 6H).

**<sup>13</sup>C NMR** (126 MHz, CDCl<sub>3</sub>) δ 177.3, 83.1, 45.4, 40.6, 39.5, 36.9, 36.8, 34.2, 28.4, 25.3, 24.9, 24.86, 24.7, 21.3.

**HRMS** (ESI) *m/z*: [M+H]<sup>+</sup> Calcd. for C<sub>24</sub>H<sub>43</sub>BNO<sub>3</sub> 404.3331; Found: 404.3330.

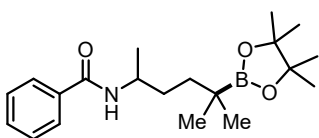

***N*-(5-methyl-5-(4,4,5,5-tetramethyl-1,3,2-dioxaborolan-2-yl)hexan-2-yl)benzamide (37):** Purification by flash column chromatography (Biotage, Yamazen universal column 16g, 2 % to 15 % Acetone in hexanes, 14 min). 25mg, 73 % yield. White solid.

**<sup>1</sup>H NMR** (500 MHz, CDCl<sub>3</sub>) δ. 7.81 – 7.75 (m, 2H), 7.50 – 7.45 (m, 1H), 7.45 – 7.38 (m, 2H), 6.18 – 6.11 (m, 1H), 4.14 – 4.03 (m, 1H), 1.61 – 1.53 (m, 1H), 1.46 – 1.39 (m, 2H), 1.33 – 1.28 (m, 1H), 1.23 (d, *J* = 6.5 Hz, 3H), 1.21 (d, *J* = 3.4 Hz, 12H), 0.93 (d, *J* = 3.9 Hz, 6H).

**<sup>13</sup>C NMR** (126 MHz, CDCl<sub>3</sub>) δ. 167.2, 135.5, 131.3, 128.6, 127.1, 83.2, 46.6, 36.7, 34.3, 25.2, 24.9, 24.8, 24.6, 21.2. (The carbon attached to boron was not observed due to quadrupolar relaxation).

**HRMS** (ESI)  $m/z$ :  $[M+H]^+$  Calcd. for  $C_{20}H_{33}BNO_3$  346.2548; Found: 346.2550.

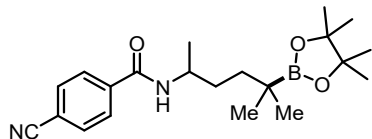

**4-Cyano-N-(5-methyl-5-(4,4,5,5-tetramethyl-1,3,2-dioxaborolan-2-yl)hexan-2-yl)benzamide (38)**: Purification by flash column chromatography (Biotage, Yamazen universal column 16g, 2 % to 15 % Actone in hexanes, 14 min). 36mg, 98 % yield. White solid.

**$^1H$  NMR** (500 MHz,  $CDCl_3$ )  $\delta$  7.87 (d,  $J = 8.4$  Hz, 2H), 7.70 (d,  $J = 8.3$  Hz, 2H), 6.35 – 6.24 (m, 1H), 4.27 – 3.67 (m, 1H), 1.61 – 1.53 (m, 1H), 1.44 – 1.34 (m, 2H), 1.32 – 1.25 (m, 1H), 1.22 (d,  $J = 6.5$  Hz, 3H), 1.19 (d,  $J = 3.2$  Hz, 12H), 0.91 (d,  $J = 3.8$  Hz, 6H).

**$^{13}C$  NMR** (126 MHz,  $CDCl_3$ )  $\delta$  165.4, 139.4, 132.4, 127.8, 118.2, 114.8, 83.2, 47.0, 36.5, 34.1, 25.2, 24.8, 24.8, 24.5, 21.0. (The carbon attached to boron was not observed due to quadrupolar relaxation).

**HRMS** (ESI)  $m/z$ :  $[M+H]^+$  Calcd. for  $C_{21}H_{32}BN_2O_3$  371.2500; Found: 371.2501.

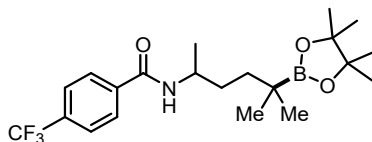

**N-(5-methyl-5-(4,4,5,5-tetramethyl-1,3,2-dioxaborolan-2-yl)hexan-2-yl)-4-(trifluoromethyl)benzamide (39)**: Purification by flash column chromatography (Biotage, Yamazen universal column 16g, 2 % to 15 % Actone in hexanes, 14 min). 33mg, 80 % yield. White solid.

**$^1H$  NMR** (500 MHz,  $CDCl_3$ )  $\delta$  7.89 (d,  $J = 8.0$  Hz, 2H), 7.68 (d,  $J = 8.1$  Hz, 2H), 6.22 (d,  $J = 7.6$  Hz, 1H), 4.12 – 3.96 (m, 1H), 1.63 – 1.54 (m, 1H), 1.45 – 1.37 (m, 2H), 1.33 – 1.27 (m, 1H), 1.24 (d,  $J = 6.5$  Hz, 3H), 1.20 (d,  $J = 3.1$  Hz, 12H), 0.93 (d,  $J = 4.1$  Hz, 6H).

**$^{13}C$  NMR** (101 MHz,  $CDCl_3$ )  $\delta$  165.9, 138.8, 133.1 (q,  $J = 32.6$  Hz), 127.6, 125.6 (q,  $J = 3.7$  Hz), 123.9 (q,  $J = 272.5$  Hz), 83.3, 46.9, 36.6, 34.2, 25.2, 24.9, 24.8, 24.6, 21.1. (The carbon attached to boron was not observed due to quadrupolar relaxation).

**$^{19}F$  NMR** (376 MHz, Chloroform- $d$ )  $\delta$  -62.95.

**HRMS** (ESI)  $m/z$ :  $[M+H]^+$  Calcd. for  $C_{21}H_{32}BF_3NO_3$  414.2422; Found: 414.2422.

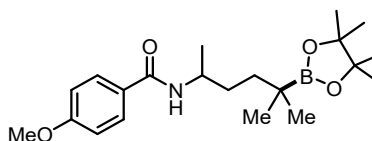

**4-Methoxy-N-(5-methyl-5-(4,4,5,5-tetramethyl-1,3,2-dioxaborolan-2-yl)hexan-2-yl)benzamide (40):** Purification by flash column chromatography (Biotage, Yamazen universal column 16g, 2 % to 15 % Actone in hexanes, 14 min). 35mg, 94 % yield. White solid.

**<sup>1</sup>H NMR** (500 MHz, CDCl<sub>3</sub>) δ. 7.75 (d, *J* = 8.8 Hz, 2H), 6.91 (d, *J* = 8.8 Hz, 2H), 6.03 (d, *J* = 7.7 Hz, 1H), 4.15 – 3.99 (m, 1H), 3.85 (s, 3H), 1.58 – 1.51 (m, 1H), 1.45 – 1.37 (m, 2H), 1.33 – 1.25 (m, 1H), 1.23 – 1.20 (m, 15H), 0.93 (d, *J* = 4.3 Hz, 6H).

**<sup>13</sup>C NMR** (126 MHz, CDCl<sub>3</sub>) δ 166.7, 162.1, 128.8, 127.7, 113.8, 83.2, 55.5, 46.5, 36.7, 34.3, 25.2, 24.9, 24.8, 24.7, 21.3. (The carbon attached to boron was not observed due to quadrupolar relaxation).

**HRMS** (ESI) *m/z*: [M+H]<sup>+</sup> Calcd. for C<sub>21</sub>H<sub>35</sub>BNO<sub>4</sub> 376.2654; Found: 376.2654.

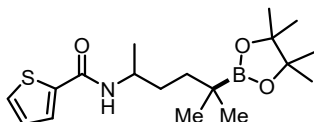

**N-(5-methyl-5-(4,4,5,5-tetramethyl-1,3,2-dioxaborolan-2-yl)hexan-2-yl)thiophene-2-carboxamide (41):** Purification by flash column chromatography (Biotage, Yamazen universal column 16g, 2 % to 15 % Actone in hexanes, 14 min). 33mg, 95 % yield. White solid.

**<sup>1</sup>H NMR** (500 MHz, CDCl<sub>3</sub>) δ 7.49 (dd, *J* = 3.7, 1.2 Hz, 1H), 7.44 (dd, *J* = 5.0, 1.2 Hz, 1H), 7.05 (dd, *J* = 5.0, 3.7 Hz, 1H), 5.95 (d, *J* = 7.8 Hz, 1H), 4.09 – 3.90 (m, 1H), 1.57 – 1.49 (m, 1H), 1.45 – 1.36 (m, 2H), 1.32 – 1.27 (m, 1H), 1.23 – 1.19 (m, 15H), 0.92 (d, *J* = 3.8 Hz, 6H).

**<sup>13</sup>C NMR** (126 MHz, CDCl<sub>3</sub>) δ 161.5, 139.9, 129.6, 127.7, 127.5, 83.2, 46.7, 36.7, 34.1, 25.1, 24.9, 24.8, 24.7, 21.2. (The carbon attached to boron was not observed due to quadrupolar relaxation).

**HRMS** (ESI) *m/z*: [M+H]<sup>+</sup> Calcd. for C<sub>18</sub>H<sub>30</sub>BNO<sub>3</sub>S 352.2112; Found: 352.2113.

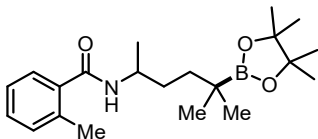

**2-Methyl-N-(5-methyl-5-(4,4,5,5-tetramethyl-1,3,2-dioxaborolan-2-yl)hexan-2-yl)benzamide (42):** Purification by flash column chromatography (Biotage, Yamazen universal column 16g, 2 % to 15 % Actone in hexanes, 14 min). 9mg, 25 % yield. White solid.

**<sup>1</sup>H NMR** (500 MHz, CDCl<sub>3</sub>) δ 7.37 – 7.34 (m, 1H), 7.30 – 7.27 (m, 1H), 7.22 – 7.18 (m, 2H), 5.86 (d, *J* = 7.9 Hz, 1H), 4.12 – 4.03 (m, 1H), 2.45 (s, 3H), 1.60 – 1.52 (m, 1H), 1.46 – 1.40 (m, 1H), 1.38 – 1.26 (m, 3H), 1.24 (d, *J* = 6.5 Hz, 3H), 1.14 (d, *J* = 4.7 Hz, 12H), 0.93 (s, 6H).

$^{13}\text{C}$  NMR (126 MHz,  $\text{CDCl}_3$ )  $\delta$  169.9, 137.5, 135.9, 130.9, 129.7, 126.8, 125.8, 83.2, 46.5, 36.7, 34.2, 25.3, 24.7, 24.7, 24.5, 21.3, 19.8. (The carbon attached to boron was not observed due to quadrupolar relaxation).

HRMS (ESI)  $m/z$ :  $[\text{M}+\text{H}]^+$  Calcd. for  $\text{C}_{21}\text{H}_{35}\text{BNO}_3$  360.2705; Found: 360.2705.

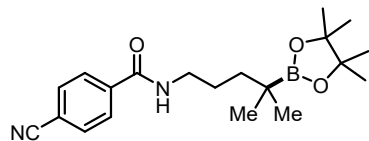

**4-Cyano-N-(4-methyl-4-(4,4,5,5-tetramethyl-1,3,2-dioxaborolan-2-yl)pentyl)benzamide (43):**  
Purification by flash column chromatography (Biotage, Yamazen universal column 16g, 2 % to 15 % Actone in hexanes, 14 min). 25mg, 70 % yield. White solid.

$^1\text{H}$  NMR (500 MHz,  $\text{CDCl}_3$ )  $\delta$  7.88 (d,  $J = 8.5$  Hz, 2H), 7.74 (d,  $J = 8.4$  Hz, 2H), 6.41 (s, 1H), 3.55 – 3.29 (m, 2H), 1.63 – 1.57 (m, 2H), 1.40 – 1.32 (m, 2H), 1.20 (s, 12H), 0.95 (s, 6H).

$^{13}\text{C}$  NMR (126 MHz,  $\text{CDCl}_3$ )  $\delta$  165.8, 139.1, 132.5, 127.8, 118.2, 115.0, 83.3, 40.7, 37.7, 26.5, 24.9, 24.8. (The carbon attached to boron was not observed due to quadrupolar relaxation).

HRMS (ESI)  $m/z$ :  $[\text{M}+\text{H}]^+$  Calcd. for  $\text{C}_{20}\text{H}_{30}\text{BN}_2\text{O}_3$  357.2344; Found: 357.2346.

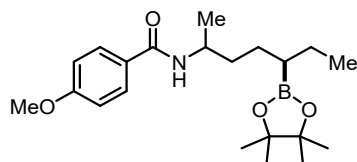

**4-Methoxy-N-((5R)-5-(4,4,5,5-tetramethyl-1,3,2-dioxaborolan-2-yl)heptan-2-yl)benzamide (44):**  
Purification by flash column chromatography (Biotage, Yamazen universal column 16g, 2 % to 15 % Actone in hexanes, 14 min). 27mg, 72 % yield. White solid.

$^1\text{H}$  NMR (500 MHz,  $\text{CDCl}_3$ )  $\delta$  7.85 – 7.62 (m, 2H), 6.99 – 6.84 (m, 2H), 5.93 (dd,  $J = 16.0, 7.9$  Hz, 1H), 4.22 – 4.01 (m, 1H), 3.84 (s, 3H), 1.57 – 1.33 (m, 6H), 1.26 – 1.20 (m, 16H), 0.89 (t,  $J = 7.4$  Hz, 3H). (Two diastereomers)

$^{13}\text{C}$  NMR (126 MHz,  $\text{CDCl}_3$ )  $\delta$  166.6, 166.5, 162.1, 128.8, 128.8, 127.7, 127.7, 113.8, 83.1, 55.5, 46.4, 46.2, 36.7, 36.5, 27.3, 27.1, 25.0, 25.0, 25.0, 24.9, 24.3, 24.3, 21.3, 21.2, 13.7, 13.7. (Two diastereomers) (The carbon attached to boron was not observed due to quadrupolar relaxation).

HRMS (ESI)  $m/z$ :  $[\text{M}+\text{H}]^+$  Calcd. for  $\text{C}_{21}\text{H}_{35}\text{BNO}_4$  376.2654; Found: 376.2654.

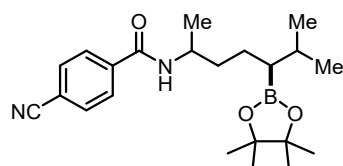

**4-Cyano-N-((5S)-6-methyl-5-(4,4,5,5-tetramethyl-1,3,2-dioxaborolan-2-yl)heptan-2-yl)benzamide (45):** Purification by flash column chromatography (Biotage, Yamazen universal column 16g, 2 % to 15 % Actone in hexanes , 14 min). 30mg, 78 % yield. White solid.

**<sup>1</sup>H NMR** (500 MHz, CDCl<sub>3</sub>) δ 7.93 – 7.82 (m, 2H), 7.77 – 7.68 (m, 2H), 6.24 – 6.15 (m, 1H), 4.20 – 4.04 (m, 1H), 1.77 – 1.67 (m, 1H), 1.61 – 1.37 (m, 4H), 1.29 – 1.15 (m, 16H), 0.93 – 0.87 (m, 6H). (Two diastereomers)

**<sup>13</sup>C NMR** (126 MHz, CDCl<sub>3</sub>) δ 165.5, 165.3, 139.3, 139.2, 132.5, 127.8, 118.2, 115.0, 83.3, 83.2, 47.1, 47.0, 36.8, 36.5, 29.8, 25.4, 25.2, 25.1, 25.0, 24.8, 22.4, 22.3, 21.9, 21.7, 21.3, 20.8. (Two diastereomers) (The carbon attached to boron was not observed due to quadrupolar relaxation).

**HRMS** (ESI) m/z: [M+H]<sup>+</sup> Calcd. for C<sub>22</sub>H<sub>34</sub>BN<sub>2</sub>O<sub>3</sub> 385.2657; Found: 385.2656.

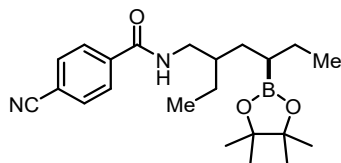

**4-Cyano-N-((4R)-2-ethyl-4-(4,4,5,5-tetramethyl-1,3,2-dioxaborolan-2-yl)hexyl)benzamide (46):** Purification by flash column chromatography (Biotage, Yamazen universal column 16g, 2 % to 15 % Actone in hexanes , 14 min). 36mg, 93 % yield. White solid.

**<sup>1</sup>H NMR** (500 MHz, CDCl<sub>3</sub>) δ 7.95 – 7.86 (m, 2H), 7.73 – 7.69 (m, 2H), 6.96 – 6.74 (m, 1H), 3.57 – 3.10 (m, 2H), 1.63 – 1.26 (m, 7H), 1.23 – 1.15 (m, 12H), 1.05 – 0.98 (m, 1H), 0.95 – 0.88 (m, 6H). (Two diastereomers)

**<sup>13</sup>C NMR** (126 MHz, CDCl<sub>3</sub>) δ 166.0, 165.6, 139.2, 139.1, 132.4, 132.4, 127.9, 118.2, 118.2, 114.9, 114.9, 83.5, 83.4, 44.1, 43.3, 40.4, 39.2, 34.1, 33.3, 26.0, 25.5, 25.2, 25.2, 25.00, 24.94, 24.9, 24.9, 13.7, 13.5, 11.6, 11.5. (Two diastereomers) (The carbon attached to boron was not observed due to quadrupolar relaxation).

**HRMS** (ESI) m/z: [M+H]<sup>+</sup> Calcd. for C<sub>22</sub>H<sub>34</sub>BN<sub>2</sub>O<sub>3</sub> 385.2657; Found: 385.2656.

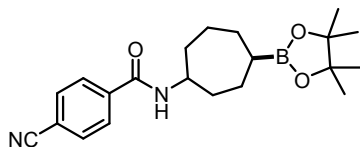

**4-Cyano-N-((4S)-4-(4,4,5,5-tetramethyl-1,3,2-dioxaborolan-2-yl)cycloheptyl)benzamide (19):** Purification by flash column chromatography (Biotage, Yamazen universal column 16g, 2 % to 15 % Actone in hexanes , 14 min). 13mg, 34 % yield. White solid.

**<sup>1</sup>H NMR** (600 MHz, CDCl<sub>3</sub>) δ 7.86 – 7.81 (m, 2H), 7.78 – 7.66 (m, 2H), 6.14 – 5.90 (m, 1H), 4.28 – 4.05 (m, 1H), 2.17 – 1.39 (m, 11H), 1.24 – 1.21 (m, 12H), 1.23 – 1.09 (m, 1H). (Two diastereomers)

**<sup>13</sup>C NMR** (126 MHz, CDCl<sub>3</sub>) δ 164.7, 139.3, 139.2, 132.6, 127.8, 127.7, 118.2, 115.0, 83.2, 51.88, 50.8, 36.7, 35.7, 34.8, 34.6, 30.1, 29.1, 25.8, 25.4, 25.0, 24.9, 24.9, 24.8, 24.1. (Two diastereomers) (The carbon attached to boron was not observed due to quadrupolar relaxation).

**HRMS** (ESI) m/z: [M+H]<sup>+</sup> Calcd. for C<sub>21</sub>H<sub>30</sub>BN<sub>2</sub>O<sub>3</sub> 369.2344; Found: 369.2344.

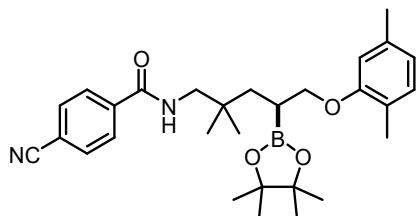

**4-Cyano-N-(2,2-dimethyl-4-(4,4,5,5-tetramethyl-1,3,2-dioxaborolan-2-yl)-5-(2,4,5-trimethylphenoxy)pentyl)benzamide (48)**: Purification by flash column chromatography (Biotage, Yamazen universal column 16g, 2 % to 15 % Acetone in hexanes, 14 min). 24mg, 47 % yield. White solid.

**<sup>1</sup>H NMR** (500 MHz, CDCl<sub>3</sub>) δ 7.89 (d, *J* = 7.9 Hz, 2H), 7.66 (d, *J* = 7.9 Hz, 2H), 7.44 – 7.36 (m, 1H), 7.00 (d, *J* = 7.5 Hz, 1H), 6.69 (d, *J* = 7.6 Hz, 1H), 6.66 (s, 1H), 4.06 – 3.94 (m, 2H), 3.57 (dd, *J* = 13.7, 7.8 Hz, 1H), 3.01 (dd, *J* = 13.7, 5.2 Hz, 1H), 2.31 (s, 3H), 2.16 (s, 3H), 1.88 (dd, *J* = 14.2, 9.4 Hz, 1H), 1.59 – 1.54 (m, 1H), 1.42 (d, *J* = 14.3 Hz, 1H), 1.20 (d, *J* = 22.2 Hz, 12H), 0.98 (s, 6H).

**<sup>13</sup>C NMR** (126 MHz, CDCl<sub>3</sub>) δ 165.8, 157.0, 139.1, 136.8, 132.4, 130.5, 127.9, 123.8, 121.5, 118.2, 114.9, 113.1, 84.1, 71.9, 47.4, 37.5, 35.7, 26.8, 25.4, 24.9, 24.8, 21.5, 15.9.

**HRMS** (APCI) m/z: [M+H]<sup>+</sup> Calcd. for C<sub>29</sub>H<sub>40</sub>O<sub>4</sub>N<sub>2</sub>B 491.3076; Found: 491.3080.

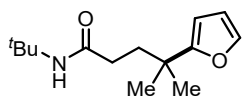

**N-(tert-butyl)-4-(furan-2-yl)-4-methylpentanamide (49)**: Cross coupling of boronic ester **11** with furan was carried out based on Aggarwal's protocol.<sup>11</sup> A 4 mL vial equipped with a stir bar and a septum was flame-dried under vacuum. The vial was allowed to cool (temperature) under vacuum and backfilled with N<sub>2</sub>. Furan (29 μL, 0.40 mmol, 2.0 equiv.) was added, followed by addition of THF (1.0 mL) under N<sub>2</sub> atmosphere. After the vial was cooled to –78 °C by a dry ice/acetone bath, *n*-BuLi (2.4 M in hexane, 0.17 mL, 0.40 mmol, 2.0 equiv.) was added dropwise. The cooling bath was removed, and the mixture was allowed to warm to room temperature for 1 h. The mixture was cooled to –78 °C again, and a solution of secondary boronic ester **11** (60 mg, 0.20 mmol, 1.0 equiv) in THF (0.5 mL) was added dropwise. The resulting mixture was stirred at –78 °C for 1 h. Then, a solution of *N*-bromosuccinimide (71.2 mg, 0.400 mmol, 2.00 equiv) in THF (1.0 mL) was added dropwise. After stirring at –78 °C for 1 h, saturated aqueous solution of Na<sub>2</sub>S<sub>2</sub>O<sub>3</sub> (3.0 mL) was

added. The reaction mixture was allowed to warm to room temperature. The reaction mixture was then diluted with Et<sub>2</sub>O (5 mL) and water (5 mL). The crude mixture was extracted with Et<sub>2</sub>O (2 x 5.0 mL), washed with brine, dried over anhydrous MgSO<sub>4</sub>, and concentrated via rotary evaporation. Purification by flash column chromatography on silica gel (5-10% EtOAc in Hexane) gave the desired product **49** as a white solid (37mg, 78% yield).

**<sup>1</sup>H NMR:** (400 MHz, CDCl<sub>3</sub>) δ 7.34 – 7.27 (m, 1H), 6.33 – 6.23 (m, 1H), 6.03 – 5.94 (m, 1H), 5.14 (s, 1H), 1.97 – 1.81 (m, 4H), 1.30 (s, 9H), 1.25 (s, 6H).

**<sup>13</sup>C NMR:** (101 MHz, CDCl<sub>3</sub>) δ 172.5, 162.2, 141.0, 109.8, 103.8, 51.1, 37.6, 35.6, 33.5, 28.9, 26.9.

**HRMS** (EI) m/z: [M]<sup>+</sup> Calcd. for C<sub>14</sub>H<sub>23</sub>NO<sub>2</sub> 237.1734; Found: 237.1729.

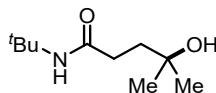

***N*-(tert-butyl)-4-hydroxy-4-methylpentanamide (50):** To a flame-dried vial was added **11** (60.0 mg, 0.20 mmol, 1 equiv.) and 2.0 mL THF. The vial was cooled to 0 °C (ice bath), followed by the addition of 1.0 mL 2 M NaOH (aq.) and 0.5 mL H<sub>2</sub>O<sub>2</sub>. After the reaction completion as monitored by TLC (~1 h), 10 mL water was added. The crude product was extracted with EtOAc (3 x 10 mL), washed with brine (10 mL), dried over Na<sub>2</sub>SO<sub>4</sub>, and concentrated in reduced pressure, affording **50** as a white solid (33.0 mg, 89% yield).

**<sup>1</sup>H NMR:** (400 MHz, CDCl<sub>3</sub>) δ 5.42 (s, 1H), 2.75 (s, 1H), 2.26 (t, *J* = 7.1 Hz, 2H), 1.79 (t, *J* = 7.2 Hz, 2H), 1.33 (s, 9H), 1.22 (s, 6H).

**<sup>13</sup>C NMR:** (101 MHz, CDCl<sub>3</sub>) δ 173.4, 70.0, 51.4, 38.4, 32.5, 29.6, 28.9.

**HRMS** (EI) m/z: [M]<sup>+</sup> Calcd. for C<sub>10</sub>H<sub>21</sub>NO<sub>2</sub> 187.1569; Found: 187.1575.

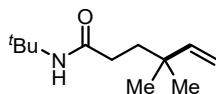

***N*-(tert-butyl)-4,4-dimethylhex-5-enamide (51):** To a solution of **11** (60.0 mg, 0.20 mmol, 1 equiv.) in THF (2.0 mL) was added vinylmagnesium bromide (4.0 equiv). The resulting mixture was stirred at room temperature for 1h. The above solution was then cooled to –78 °C, and iodine (4.0 equiv) in methanol (1.0 mL) was added. The reaction mixture was stirred at the –78 °C for 1 h, followed by addition of a solution of NaOMe (8.0 equiv) in methanol (2.0 mL). The reaction was allowed to warm to room temperature and stirred for another 1.5 h. After that, the reaction was diluted with pentane (20 mL) and washed with a saturated aqueous solution of Na<sub>2</sub>S<sub>2</sub>O<sub>3</sub> (3 mL). The crude mixture was extracted with EtOAc (20 mL) was added, washed with brine (10 mL), dried over Na<sub>2</sub>SO<sub>4</sub>, and concentrated via rotary evaporation. Purification by flash column



chromatography on silica gel (5-30% EtOAc in Hexane) gave the desired product **51** as a white solid (31mg, 79% yield).

**<sup>1</sup>H NMR:** (500 MHz, CDCl<sub>3</sub>) δ 5.77 – 5.69 (m, 1H), 5.21 (s, 1H), 4.96 – 4.85 (m, 2H), 2.05 – 1.91 (m, 2H), 1.63 – 1.56 (m, 2H), 1.32 (s, 9H), 0.98 (s, 6H).

**<sup>13</sup>C NMR:** (126 MHz, CDCl<sub>3</sub>) δ 172.9, 147.7, 111.2, 51.2, 37.9, 36.4, 33.3, 29.0, 26.7.

**HRMS** (EI) m/z: [M]<sup>+</sup> Calcd. for C<sub>12</sub>H<sub>23</sub>NO 197.1775; Found: 197.1781.

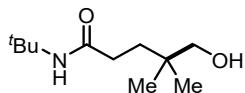

***N*-(tert-butyl)-5-hydroxy-4,4-dimethylpentanamide (52):** To an oven-dried 10 mL Schlenk tube containing a stirring bar was charged **11** (30 mg, 0.1 mmol). The tube was tightly sealed with a septum. Then, anhydrous THF (1.0 mL) was added, followed by CH<sub>2</sub>Br<sub>2</sub> (21 μL, 0.3 mmol) under N<sub>2</sub> atmosphere. The reaction mixture was cooled down to -78 °C, and *n*-BuLi (0.15 mL (1.6M), 0.25 mmol) was added dropwise over 5–6 min. The reaction mixture was stirred at the same temperature for 1 h and at room temperature for another 1 h. Next, the reaction mixture was again cooled to -78 °C, and *n*-BuLi (0.16 mL (1.6 M), 0.25 mmol) was added dropwise over 5–6 min. The reaction stirred at the same temperature for 1 h, followed by stirring at room temperature for another 1 h. NaOH (3.0 M, 1.0 mL) and methanol (1.0 mL) were subsequently added. After the reaction was cooled to 0 °C, 30% aqueous H<sub>2</sub>O<sub>2</sub> (0.25 mL) was added dropwise. The reaction was stirred at room temperature for 3 h. The crude product was extracted with EtOAc (10 mL), washed with brine (5 mL), dried over Na<sub>2</sub>SO<sub>4</sub>, and concentrated under reduce pressure. Purification by flash column chromatography on silica gel (5-30% EtOAc in Hexane) gave product **52** as a white solid (9 mg, 47% yield).

**<sup>1</sup>H NMR:** (400 MHz, CDCl<sub>3</sub>) δ 5.34 (s, 1H), 3.22 (s, 1H), 2.12 (t, *J* = 7.0 Hz, 2H), 1.59 (t, *J* = 6.8 Hz, 2H), 1.34 (s, 9H), 0.87 (s, 6H).

**<sup>13</sup>C NMR:** (101 MHz, CDCl<sub>3</sub>) δ 173.6, 70.3, 51.5 35.4, 32.7, 32.1, 28.9, 24.6.

**HRMS** (EI) m/z: [M]<sup>+</sup> Calcd. for C<sub>11</sub>H<sub>23</sub>NO<sub>2</sub> 201.1724; Found: 201.1727.

## 5. Mechanistic Studies

### 5.1 Radical trapping experiment

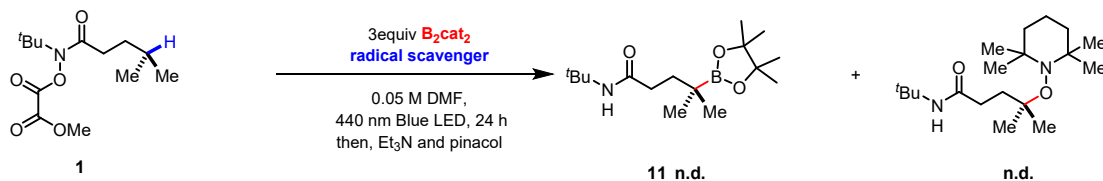

To a flame-dried reaction tube equipped with a stir bar was charged  $B_2cat_2$  (3.0 equiv.) and TEMPO or BHT. The tube was tightly sealed with a rubber septum. After evacuation and backfilled nitrogen for 5 times, **1** (0.2 mmol, 1.0 equiv.) and DMF (0.05 M) were added via syringes. The resulting mixture was stirred under Blue LED (45 W, 440 nm) irradiation for 24 h. After the reaction was complete as monitored by TLC, the irradiation was stopped. Pinacol (2.0 equiv. based on  $B_2cat_2$ ) in  $Et_3N$  (1.0 mL) was added via a syringe, and the mixture was stirred for additional 1 h at room temperature. The reaction mixture was then partitioned between EtOAc and water. The organic layer was collected, washed with an aqueous solution of  $NH_4Cl$ , dried over  $MgSO_4$ , and concentrated under reduced pressure. Product **11** was not observed based on  $^1H$  NMR spectroscopy and GCMS analysis.

### 5.2 Cyclization experiment

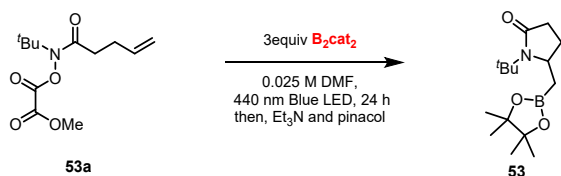

To a flame-dried reaction tube equipped with a stir bar was charged  $B_2cat_2$  (3.0 equiv.). The tube was sealed with a rubber septum. After evacuation and backfilled nitrogen for 5 times, **53a** (0.2 mmol, 1.0 equiv.) and DMF (0.025 M) were added via syringes. The resulting mixture was stirred under Blue LED (45 W, 440 nm) irradiation for 24 h. After the reaction was complete, the light irradiation was stopped. Pinacol (2.0 equiv. based on  $B_2cat_2$ ) dissolved in  $Et_3N$  (1.0 mL) was added via a syringe, and the mixture was stirred for additional 1 h at room temperature. The reaction mixture was partitioned between EtOAc and water. The organic layer was collected, washed with saturated aqueous  $NH_4Cl$ , dried over  $MgSO_4$ , and concentrated under reduced pressure. The resulting reaction mixture was purified by flash chromatography on silica gel to give product **53**.

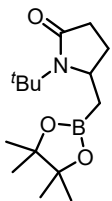

**1-(tert-butyl)-5-((4,4,5,5-tetramethyl-1,3,2-dioxaborolan-2-yl)methyl)pyrrolidin-2-one (53):** 21% NMR yield. Purification by flash column chromatography (Biotage, Yamazen universal column 55g, 25 % EtOAc in Hexanes, 14 min). White solid.

<sup>1</sup>H NMR (500 MHz, CDCl<sub>3</sub>) 4.14 – 4.03 (m, 1H), 2.60 – 2.52 (m, 1H), 2.30 – 2.20 (m, 1H), 2.12 – 2.06 (m, 1H), 1.64 – 1.57 (m, 1H), 1.44 (s, 9H), 1.30 – 1.10 (m, 2H), 1.25 (s, 6H), 1.24 (s, 6H).

<sup>13</sup>C NMR (126 MHz, CDCl<sub>3</sub>) 175.6, 83.7, 56.1, 54.4, 31.6, 28.5, 27.1, 25.1, 24.8.

Spectral data is consistent with those reported in literature:

*Org. Lett.* **2021**, *23*, 7688–7692.

### 5.3 Radical clock experiment

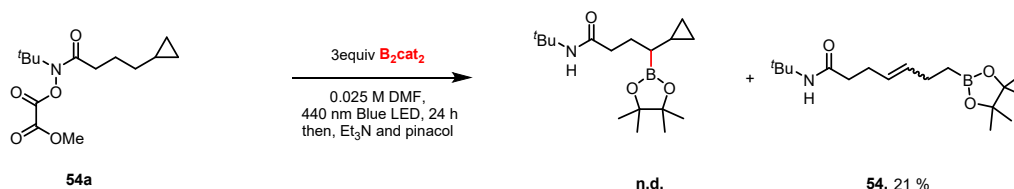

To a flame-dried reaction tube equipped with a stir bar was added B<sub>2</sub>cat<sub>2</sub> (3.0 equiv.). The tube was sealed with a rubber septum. After evacuation and backfilled nitrogen for 5 times, **54a** (0.2 mmol, 1.0 equiv.) and DMF (0.025 M) were added via syringes. The resulting reaction mixture was stirred under Blue LED (45 W, 440 nm) irradiation for 24 h. After the reaction was complete, the light irradiation was stopped. Pinacol (2.0 equiv. based on B<sub>2</sub>cat<sub>2</sub>) dissolved in Et<sub>3</sub>N (1.0 mL) was added via a syringe, and the mixture was stirred for additional 1 h at room temperature. After that, the reaction mixture was partitioned between EtOAc and water. The organic layer was collected, washed with saturated aqueous NH<sub>4</sub>Cl, dried over MgSO<sub>4</sub>, and concentrated under reduced pressure. The resulting reaction mixture was purified by flash chromatography on silica gel to give **54** as a mixture of two diastereoisomers.

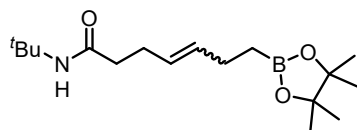

*N*-(*tert*-butyl)-7-(4,4,5,5-tetramethyl-1,3,2-dioxaborolan-2-yl)hept-4-enamide (**54**): 21% NMR yield. Purification by flash column chromatography (Biotage, Yamazen universal column 55g, 25 % EtOAc in Hexanes, 14 min). White solid.

<sup>1</sup>H NMR (400 MHz, CDCl<sub>3</sub>): δ 5.58 – 5.48 (m, 1H), 5.45 – 5.33 (m, 1H), 5.28 (s, 1H), 2.37 – 2.24 (m, 2H), 2.17 – 2.05 (m, 4H), 1.33 (s, 9H), 1.24 (s, 12H), 0.84 (t, *J* = 7.8 Hz, 2H). (Two diastereomers)

<sup>13</sup>C NMR (101 MHz, CDCl<sub>3</sub>): δ 172.1, 133.7, 133.4, 127.6, 127.2, 83.2, 83.2, 51.2, 37.8, 37.7, 29.0, 29.0, 28.8, 27.0, 25.0. (Two diastereomers)

HRMS (ESI) *m/z*: [M+Na]<sup>+</sup> Calcd. for C<sub>17</sub>H<sub>32</sub>BNO<sub>3</sub>Na 332.2371; Found: 332.2373.

## 5.4 UV/VIS Absorption Spectroscopy

The reaction of *O*-oxalate hydroxamic ester **1** and B<sub>2</sub>(cat)<sub>2</sub> was investigated by UV/Vis spectroscopy to determine whether an EDA complex forms under the reaction conditions (Figure S1). When comparing a DMF solution of B<sub>2</sub>(cat)<sub>2</sub> (red) to a mixture of **1** and B<sub>2</sub>(cat)<sub>2</sub> both before (blue) and after (green) light irradiation, no significant signal for an EDA complex exists.<sup>12</sup> The spectra for B<sub>2</sub>(cat)<sub>2</sub> alone, however, does have an absorption tail that extends to 450 nm. This suggests that B<sub>2</sub>(cat)<sub>2</sub> can potentially be excited by 440 nm light.

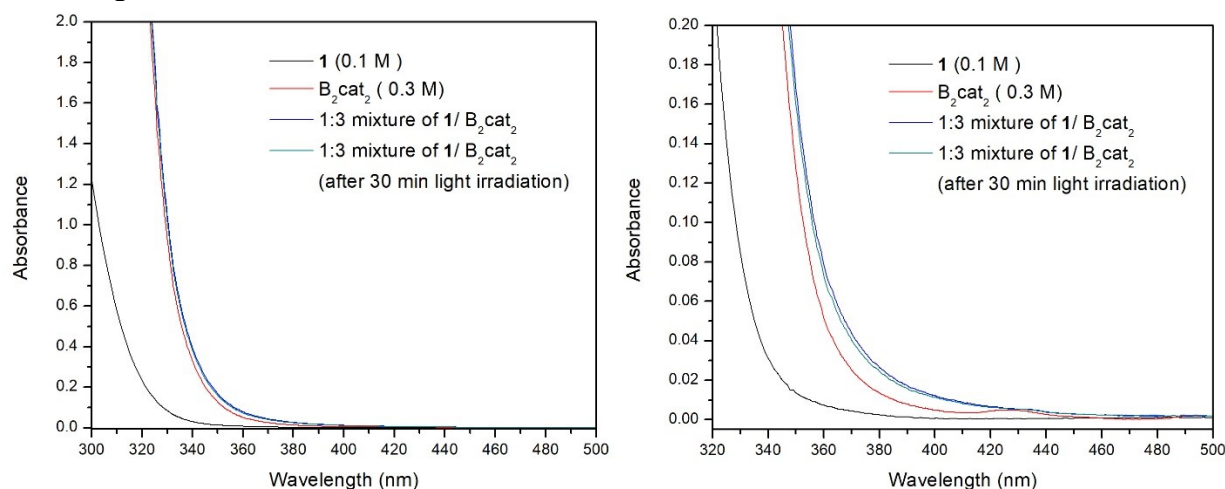

Figure S1. UV/Vis absorption spectra of DMF solutions of B<sub>2</sub>cat<sub>2</sub> (0.3 M), **1** (0.10 M), and a mixture of B<sub>2</sub>cat<sub>2</sub> (0.3 M) and **1** (0.10 M) before and after light irradiation, respectively. Left box: full region; Right box: expanded region.

The concentration of B<sub>2</sub>cat<sub>2</sub> under standard reaction conditions was set as 0.3 M. We carried out UV-Vis studies for a set of mixtures of B<sub>2</sub>cat<sub>2</sub> with oxalate **1** at different concentrations of **1** (0.008, 0.016, 0.033, 0.066 and 0.1 M) in DMF. UV-Vis spectra showed weak absorption at λ<sub>max</sub> ~430 nm, suggesting the formation of a DMF·B<sub>2</sub>(cat)<sub>2</sub> adduct which corresponds to literature.<sup>13</sup> It was observed that the absorption intensity at ~430 nm decreases when **1** was added.

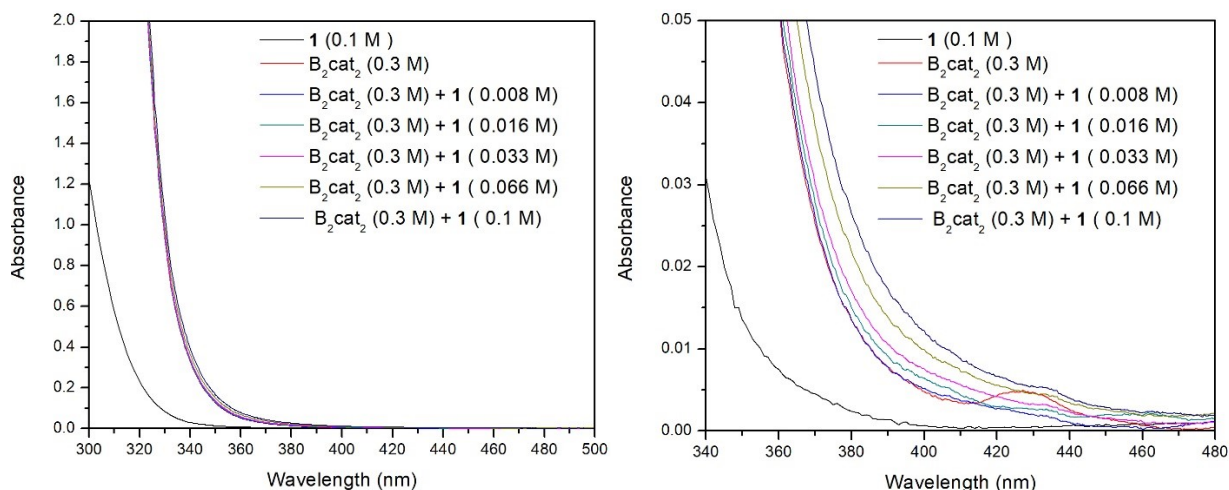

Figure S2. UV/vis absorption spectra of **1** (0.1 M) and B<sub>2</sub>cat<sub>2</sub> (0.3 M) and mixtures of **1** (0.008, 0.016, 0.033, 0.066 and 0.1 M) and B<sub>2</sub>cat<sub>2</sub> (0.3 M) in DMF. Left box: full region; Right box: expanded region.

The UV/vis absorption spectra of *O*-benzoyl hydroxamic ester **9** in DMF (0.10 M), B<sub>2</sub>cat<sub>2</sub> (0.3 M), and a mixture of **9** (0.10 M) and B<sub>2</sub>cat<sub>2</sub> (0.3 M) are shown in Figure S3. The bathochromic shift is indicative of EDA complex formation.<sup>12</sup>

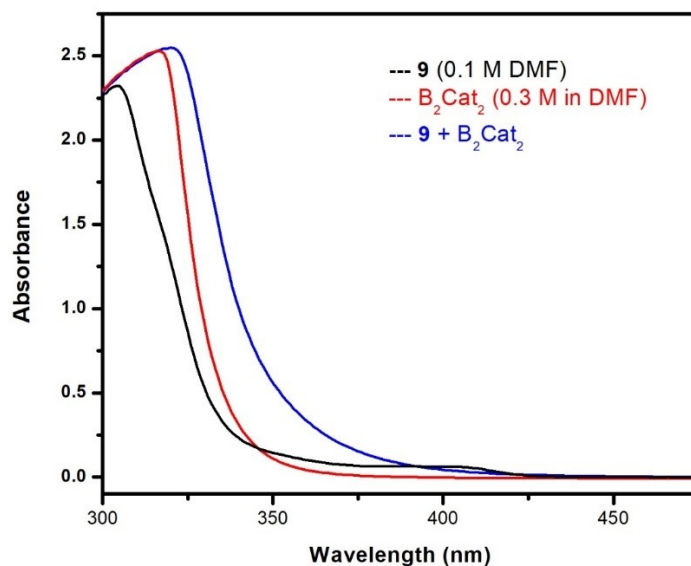

Figure S3. UV/vis absorption spectra of **9**, B<sub>2</sub>cat<sub>2</sub>, and a 1:3 mixture of **9** and B<sub>2</sub>cat<sub>2</sub> in DMF.

## 6. References

- [1] Liu, Z.; Cook, S. P. *Org. Lett.* **2022**, *24*, 3313–3318.
- [2] Pinter, E. N.; Bingham, J. E., AbuSalim, D. I., Cook, S. P. *Chem. Sci.* **2020**, *11*, 1102–1106.
- [3] Zeng, X.; Yan, W.; Paeth, M.; Zacate, S. B.; Hong, P. -H.; Wang, Y.; Yang, D.; Yang, K.; Yan, T.; Song, C.; Cao, Z.; Cheng, M. -J.; Liu, W. *J. Am. Chem. Soc.* **2019**, *141*, 19941–19949.
- [4] Morcillo, S. P.; Dauncey, E. D.; Kim, J. H.; Douglas, J. J.; Sheikh, N. S.; Leonori, D. *Angew. Chem. Int. Ed.* **2018**, *57*, 12945-12949.
- [5] Chen, H.; Guo, L.; Yu, S. *Org. Lett.* **2018**, *20*, 6255–6259.
- [6] Valerie A. S.; Ryan, K. Q.; Andrew, T. B.; Erik. J. A. *J. Am. Chem. Soc.* **2014**, *136*, 14389-14392.
- [7] Tokuyama, H. *Org. Synth.* **2003**, *80*, 207-2018.
- [8] Dian, F. C.; John, C. K.; Tomislav, R. *J. Am. Chem. Soc.* **2017**, *139*, 14897–14900.
- [9] Marinus, A. B.; Sean, A. R.; Christina, M. W. *J. Am. Chem. Soc.* **2012**, *134*, 9721–9726.
- [10] Hui, C.; Wen, J. F.; Xiang, A. Y.; Shou, Y. Y. *Nat. Commun.* **2019**, *10*, 4743.
- [11] Yu, Q. M.; Jia, X. K.; Yan, N. M.; Xue, N. C. *Green Chem.* **2021**, *23*, 3595-3599.
- [12] C. Shu, R. Madhavachary, A. Noble, V. K. Aggarwal, *Org. Lett.* **2020**, *22*, 7213–7218.
- [13] Ma, G. B.; Chen, C. Z.; Talukdar, S.; Zhao, X. L.; Lei, C. H.; Gong, H. G. *Chem. Commun.* **2020**, *56*, 10219-10222.



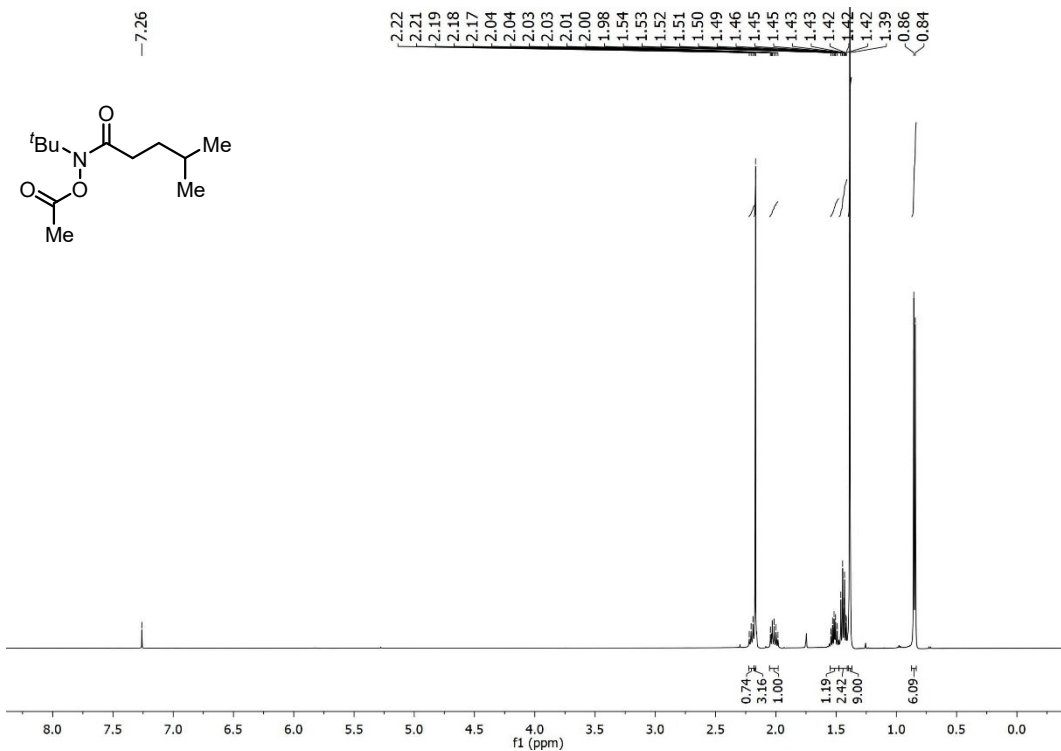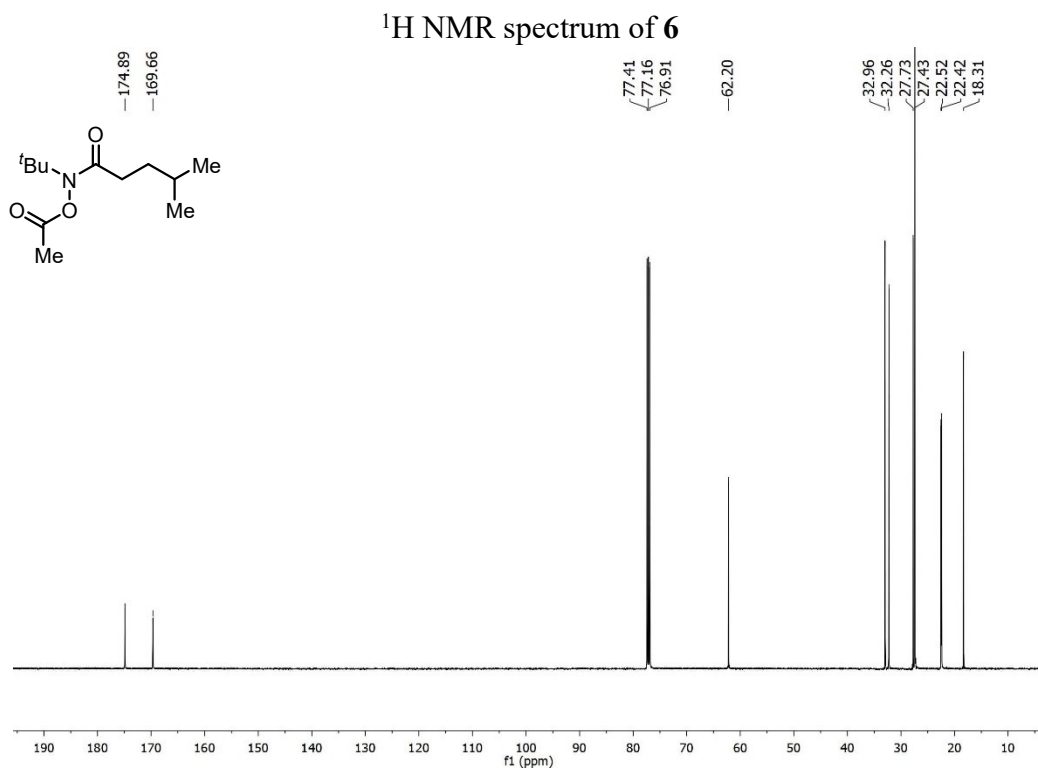

**<sup>13</sup>C NMR spectrum of 6**



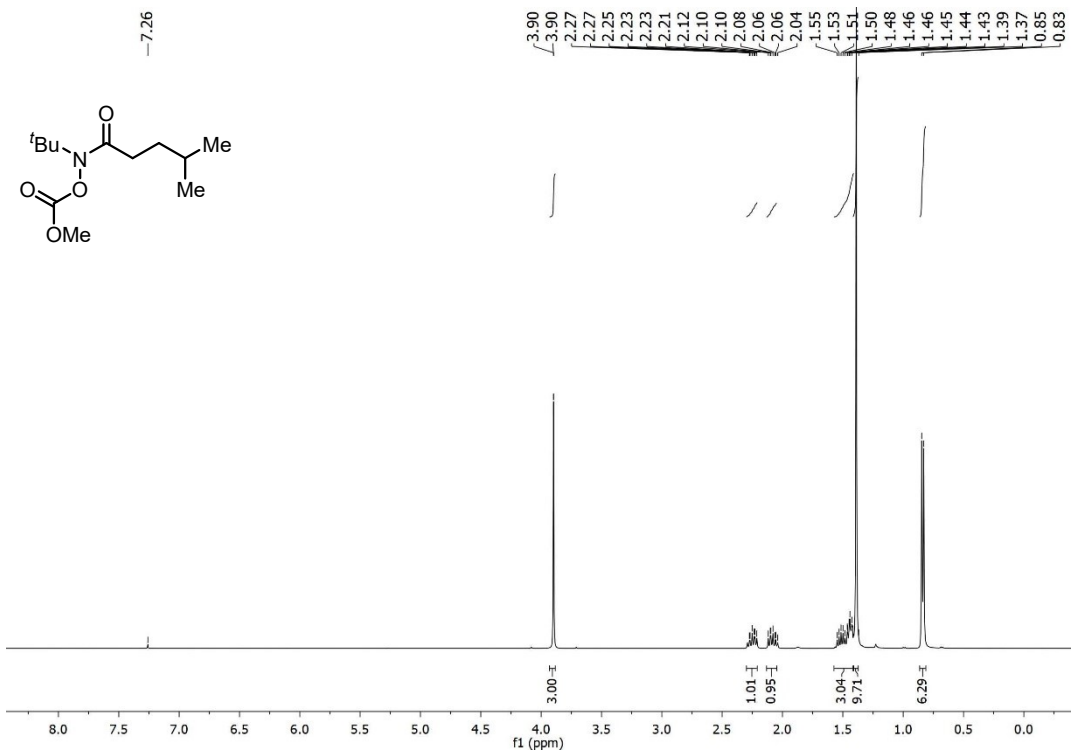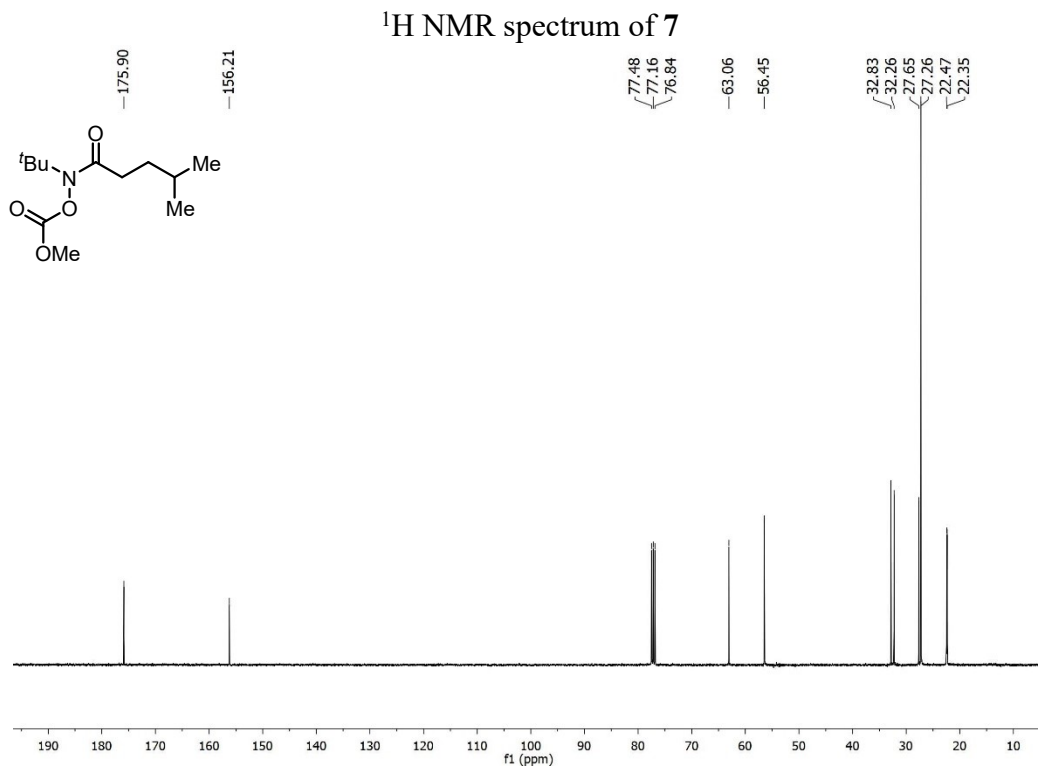

**<sup>13</sup>C NMR spectrum of 7**

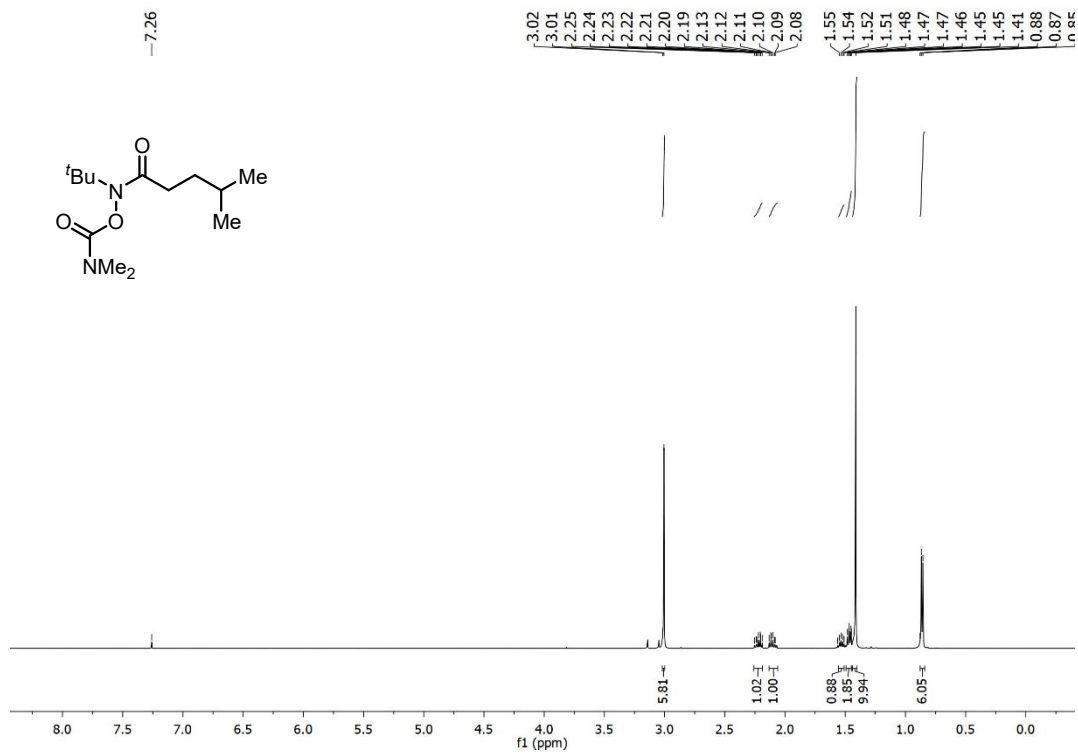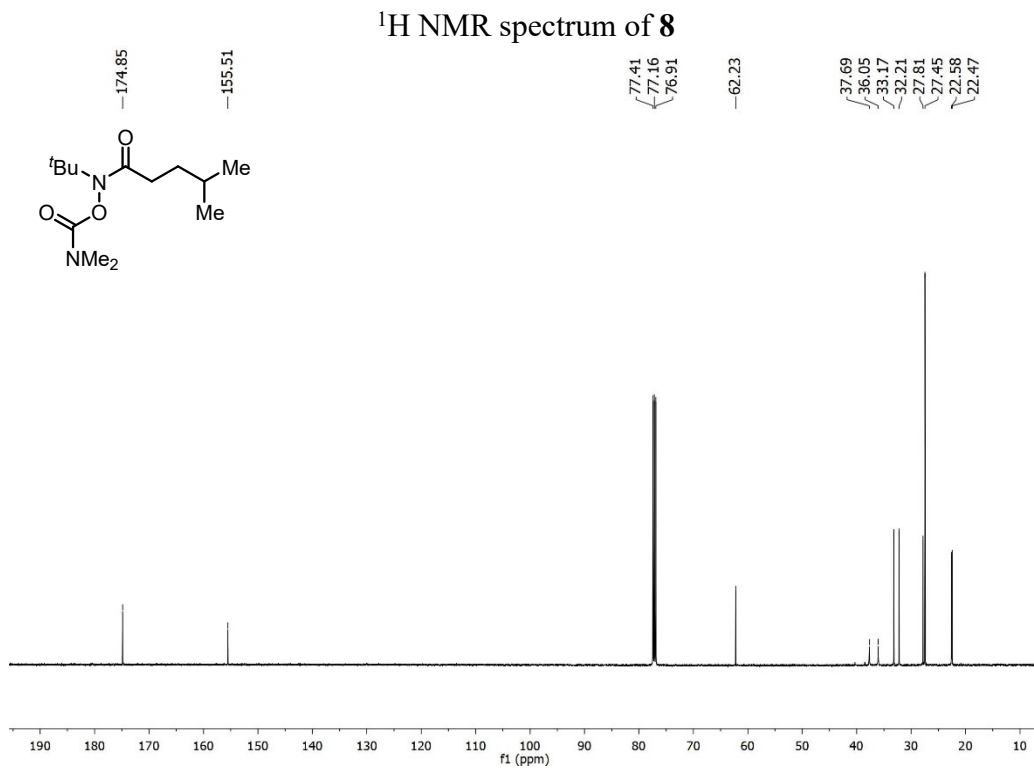

**<sup>13</sup>C NMR spectrum of 8**

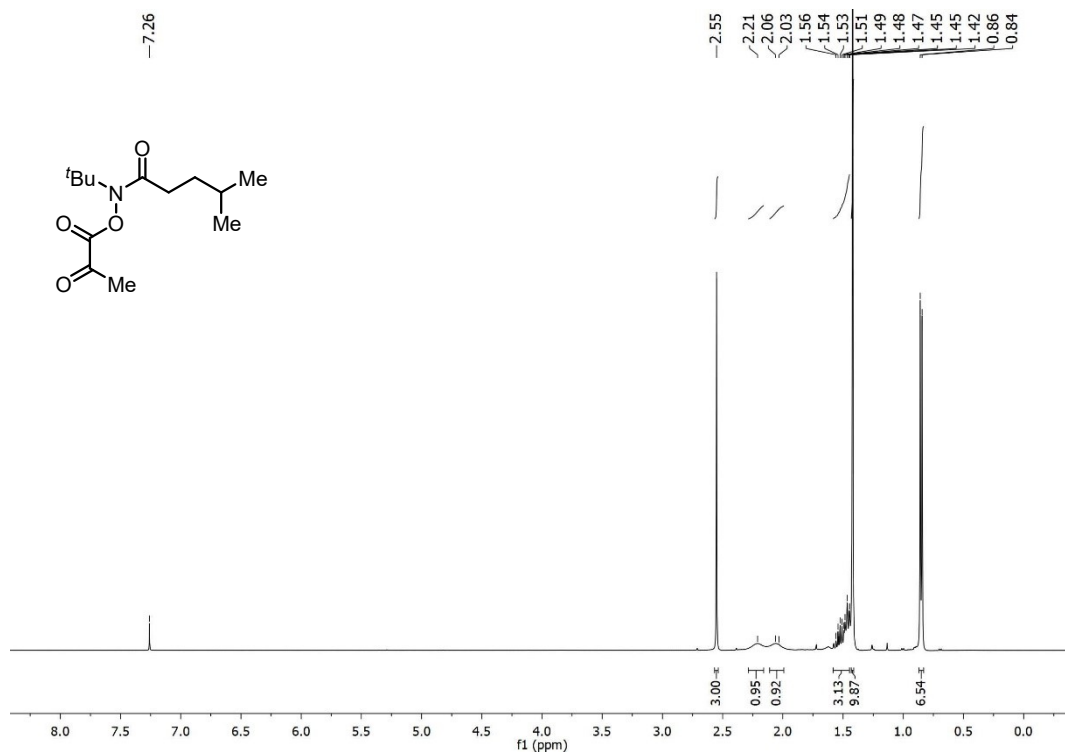

**<sup>1</sup>H NMR spectrum of 10**

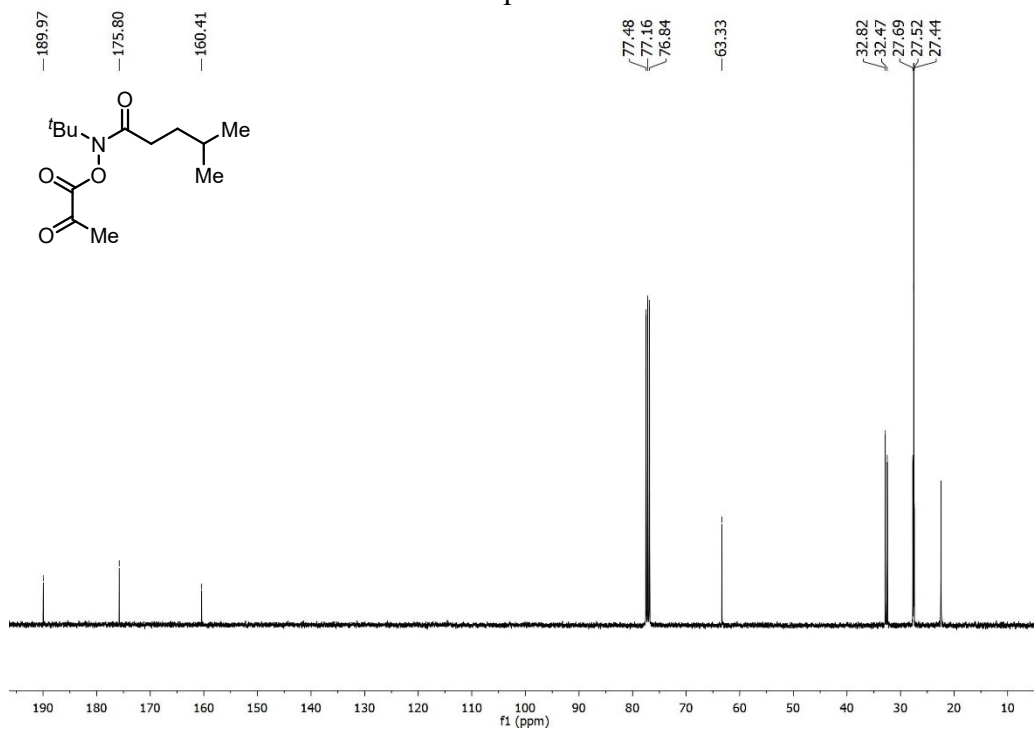

**<sup>13</sup>C NMR spectrum of 10**

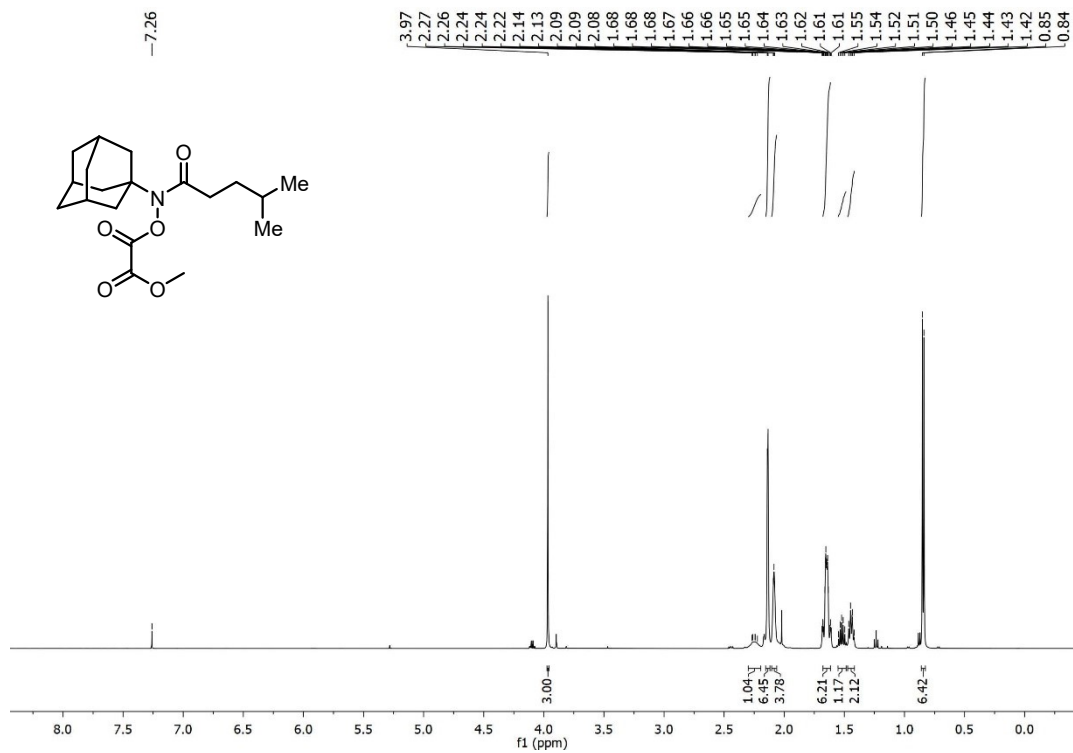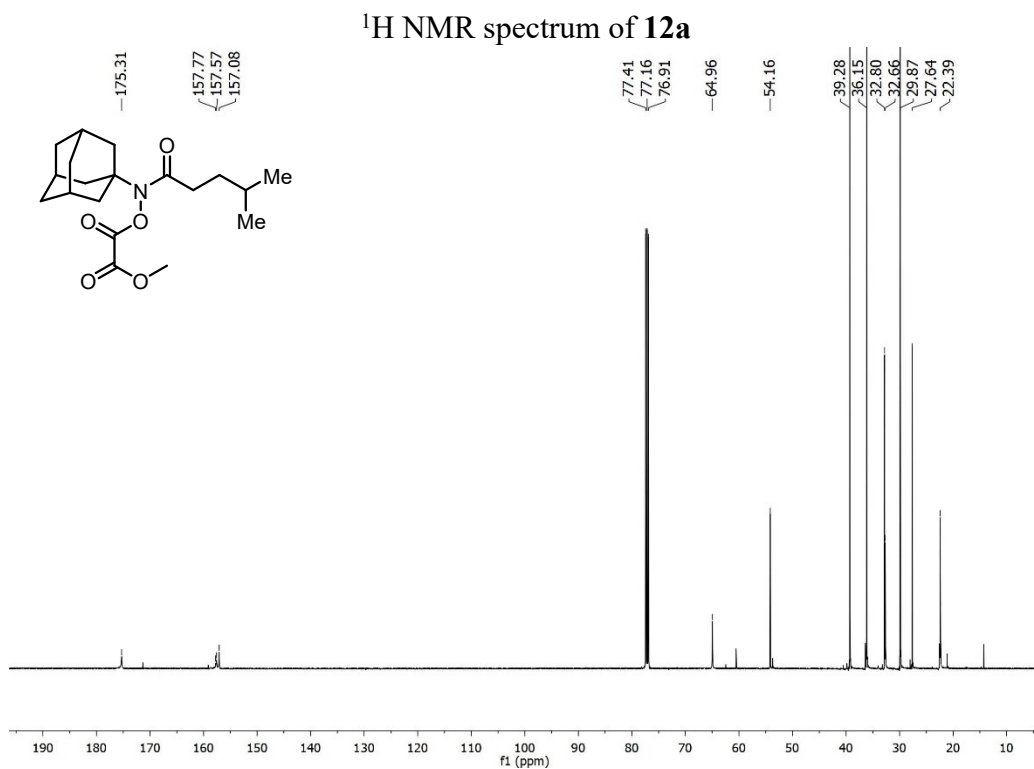

**<sup>13</sup>C NMR spectrum of 12a**

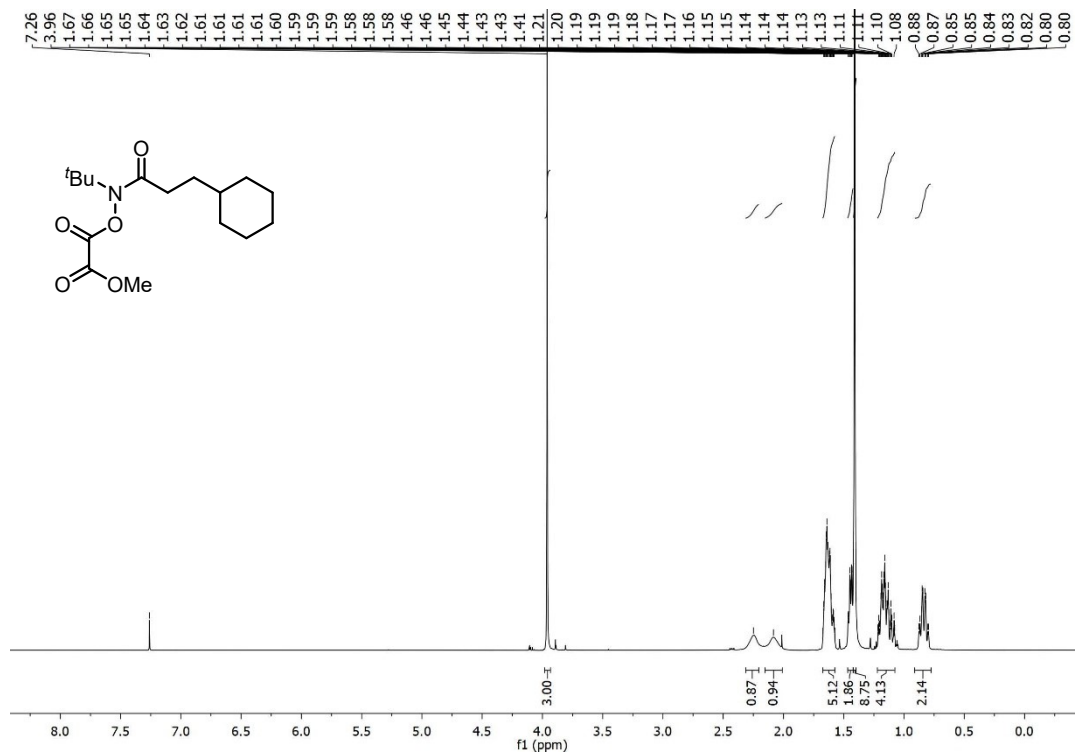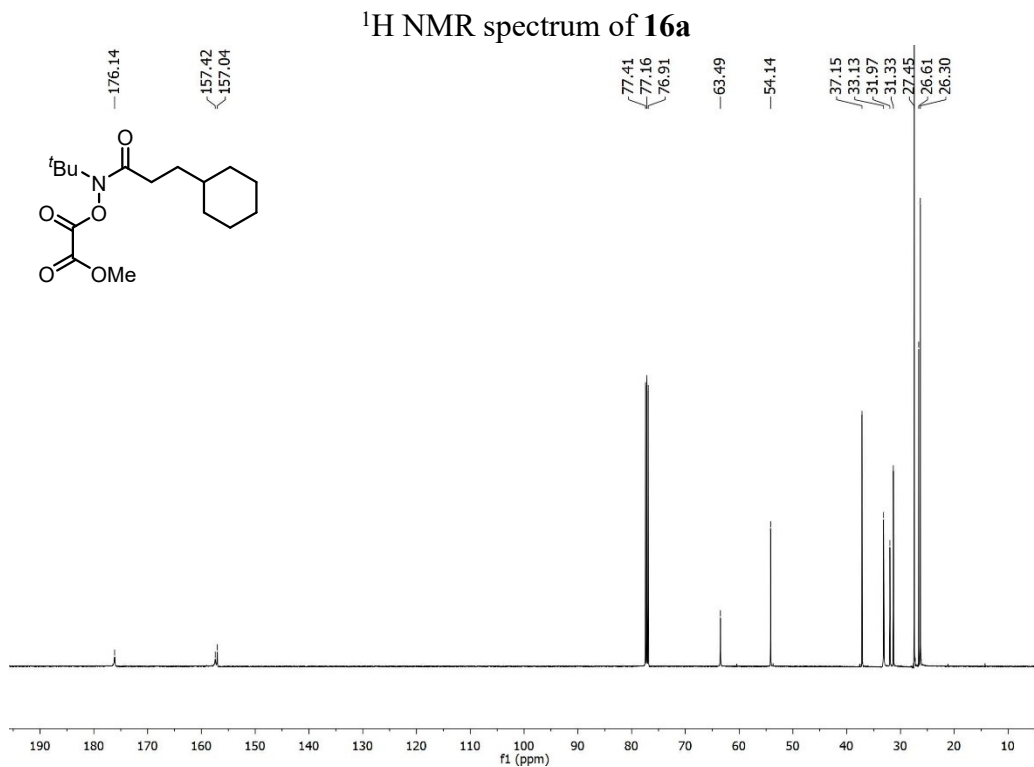

**<sup>13</sup>C NMR spectrum of 16a**

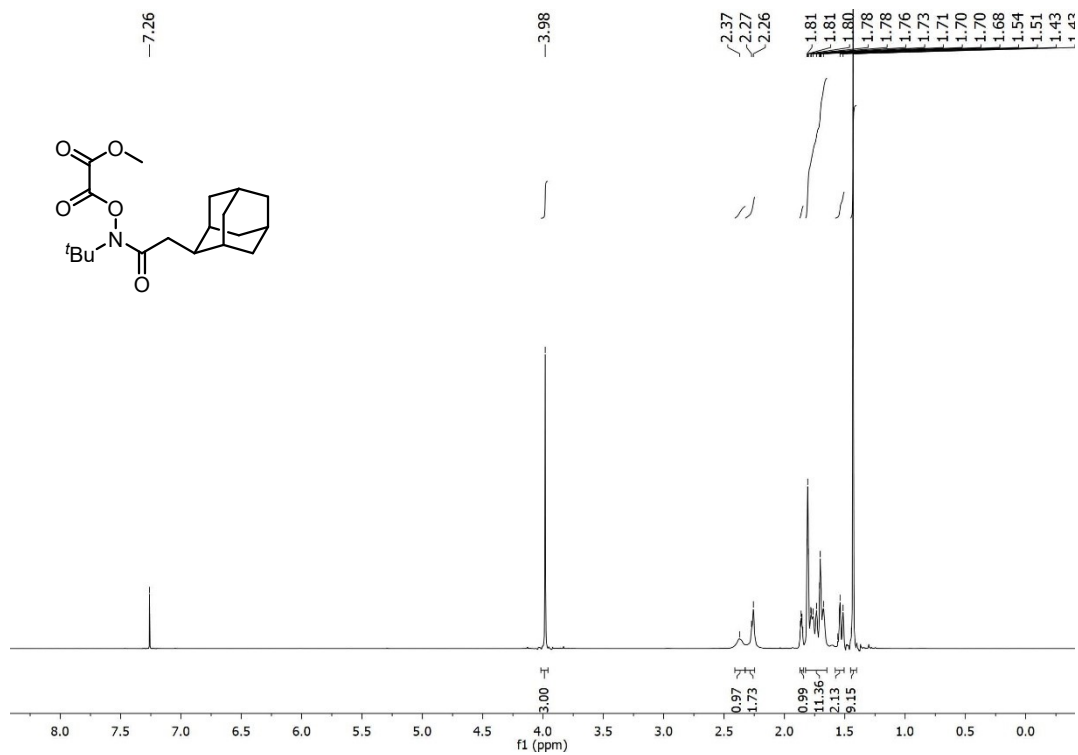

**<sup>1</sup>H NMR spectrum of 17a**

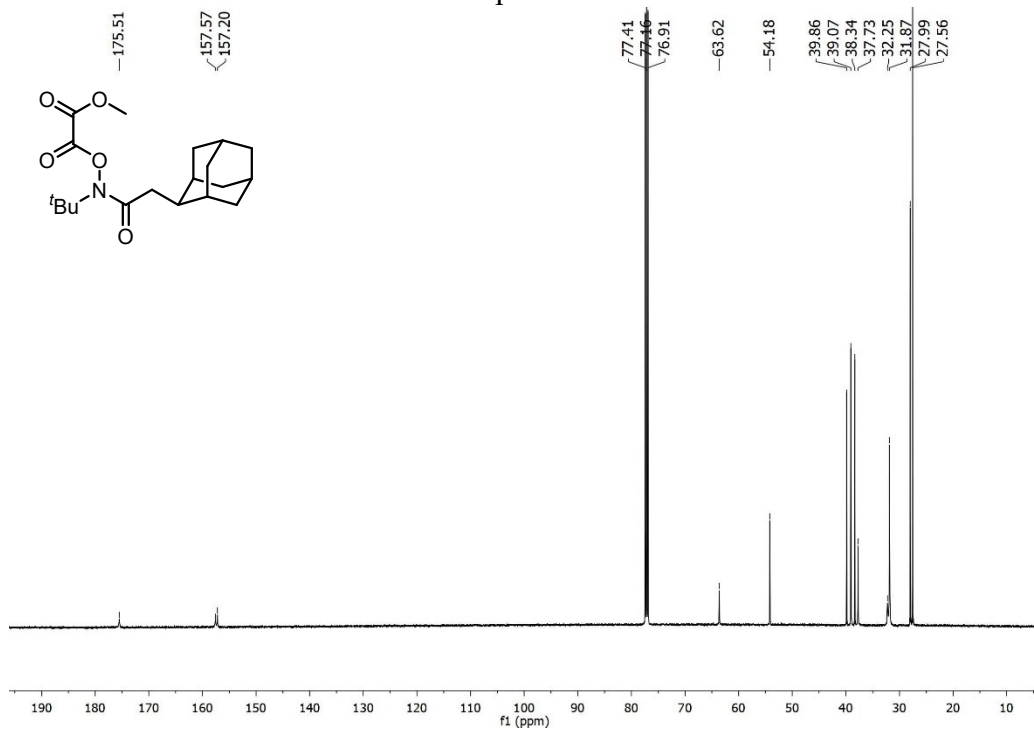

**<sup>13</sup>C NMR spectrum of 17a**

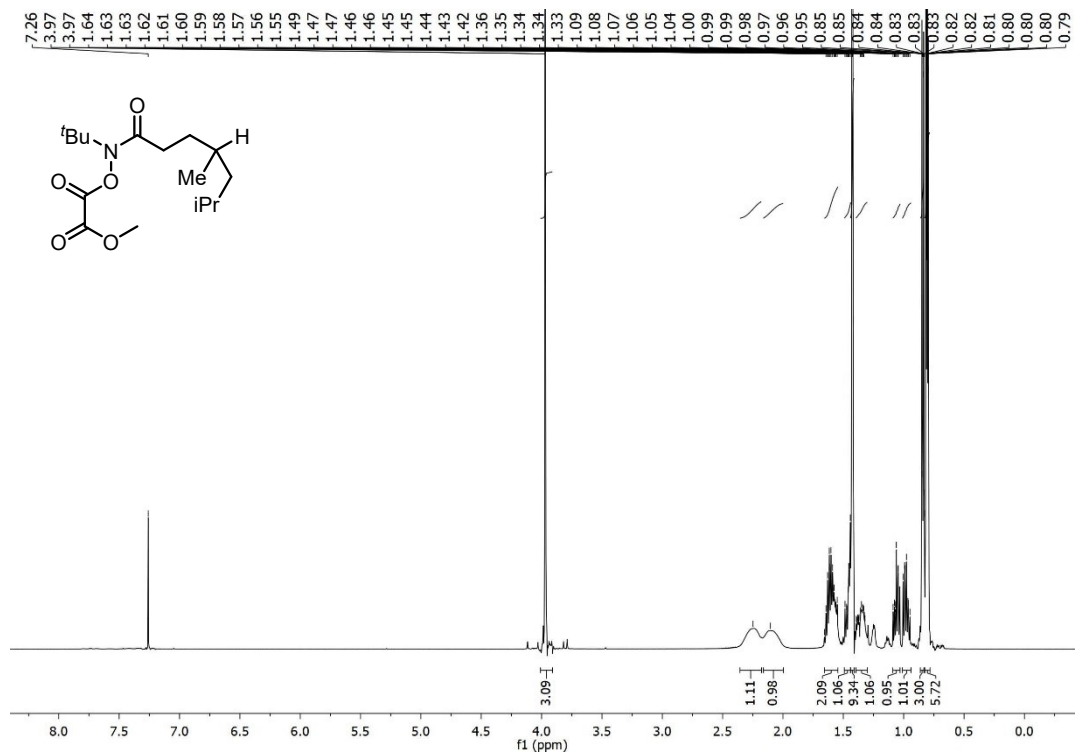

**<sup>1</sup>H NMR spectrum of 18a**

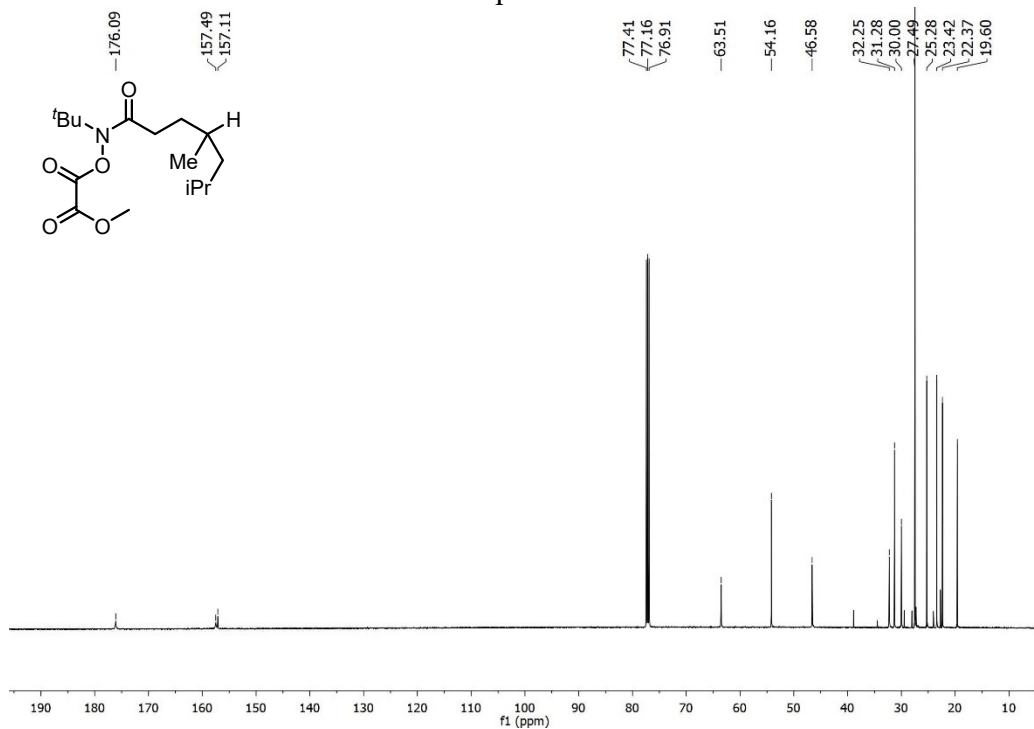

**<sup>13</sup>C NMR spectrum of 18a**

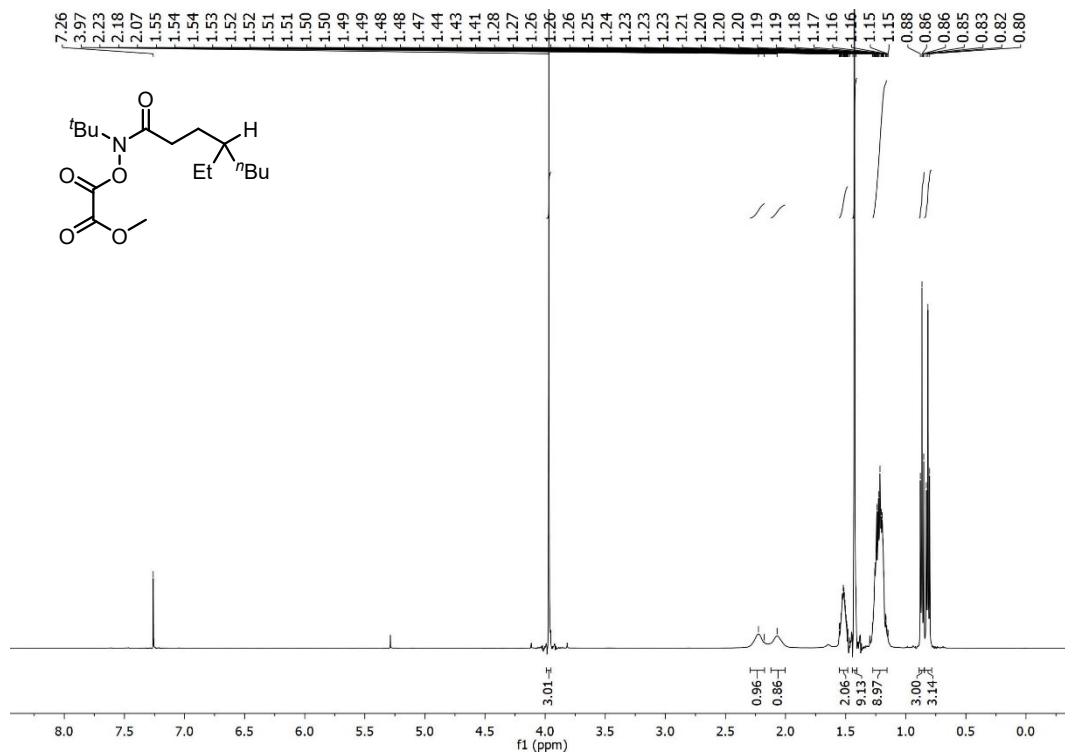

**<sup>1</sup>H NMR spectrum of 19a**

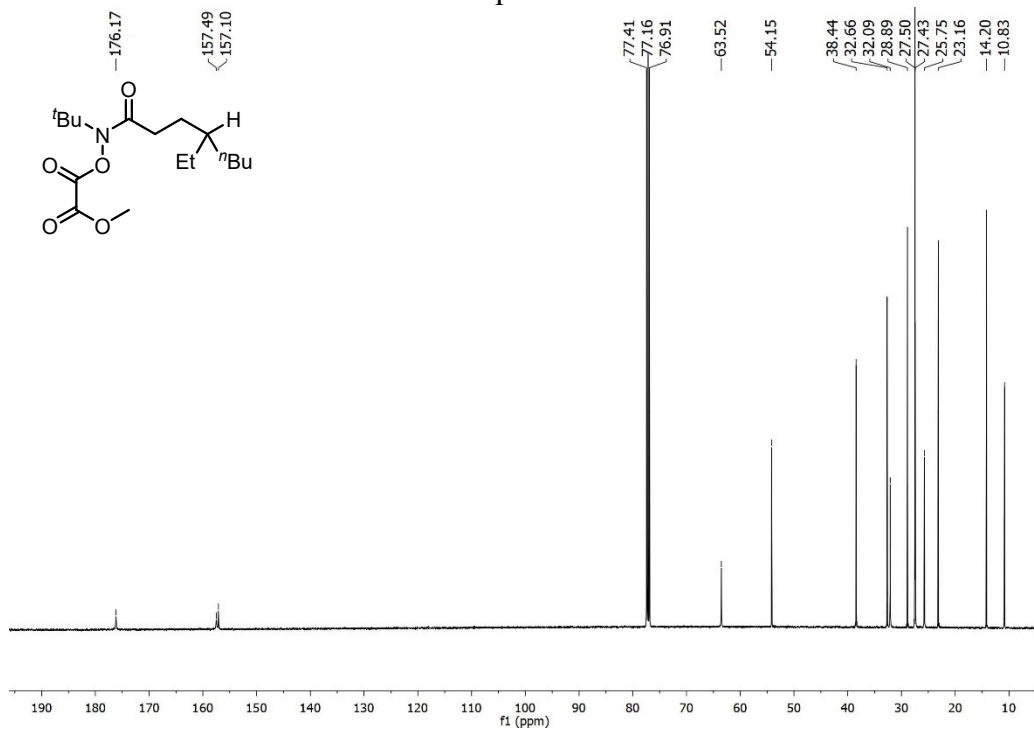

**<sup>13</sup>C NMR spectrum of 19a**



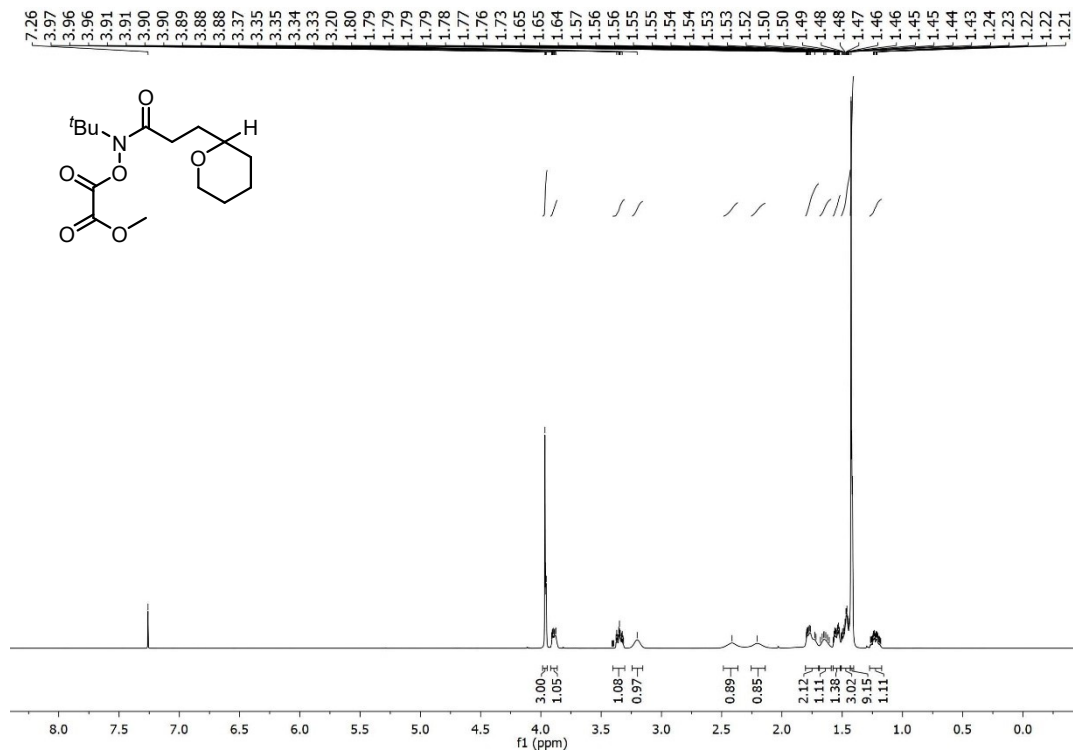

<sup>1</sup>H NMR spectrum of 24a

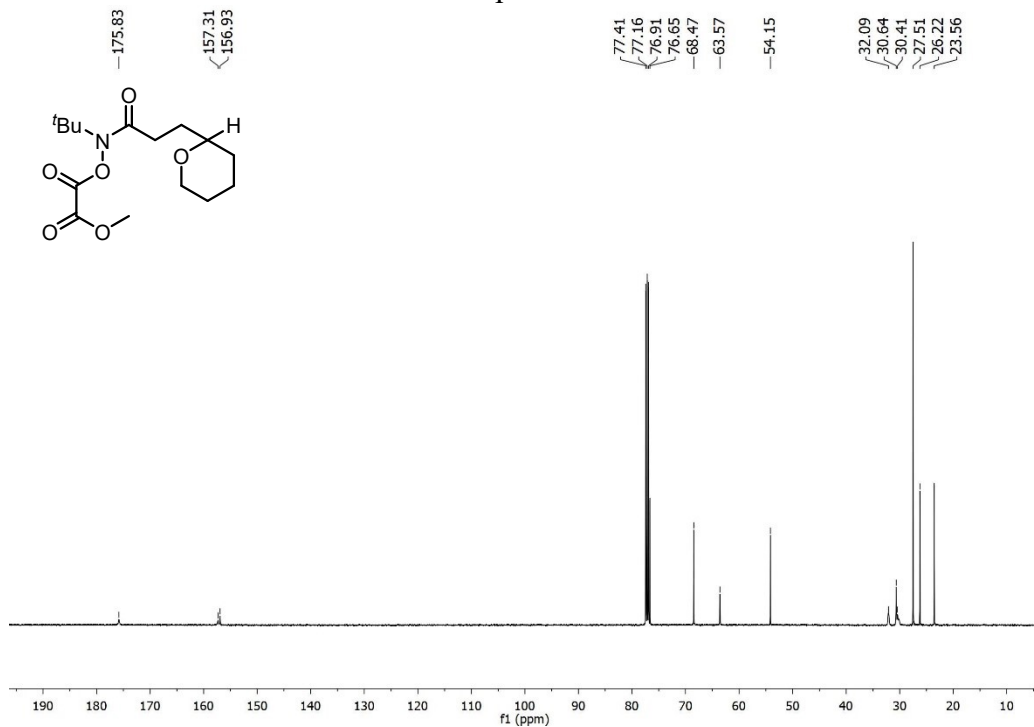

<sup>13</sup>C NMR spectrum of 24a

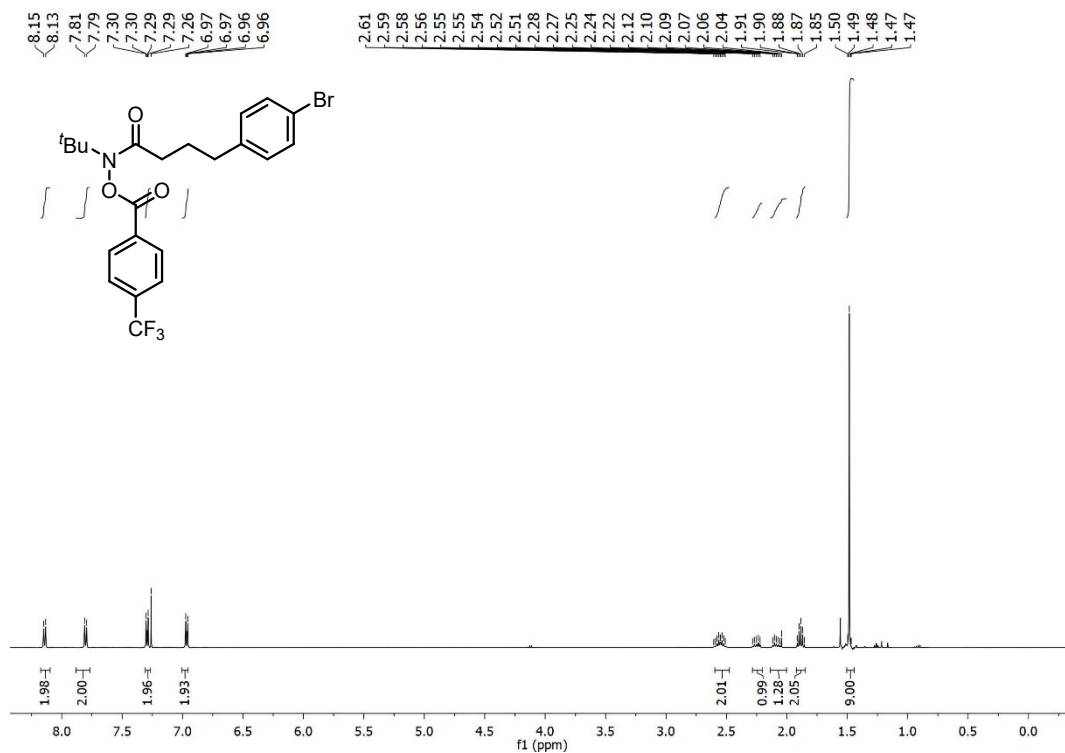

<sup>1</sup>H NMR spectrum of 30a

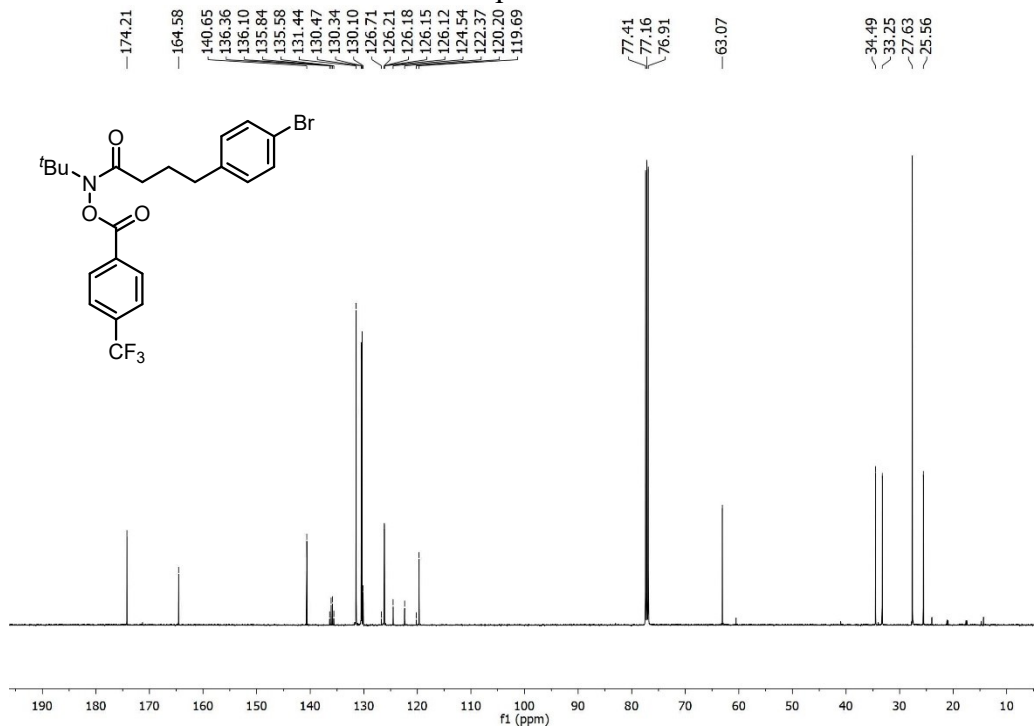

<sup>13</sup>C NMR spectrum of 30a

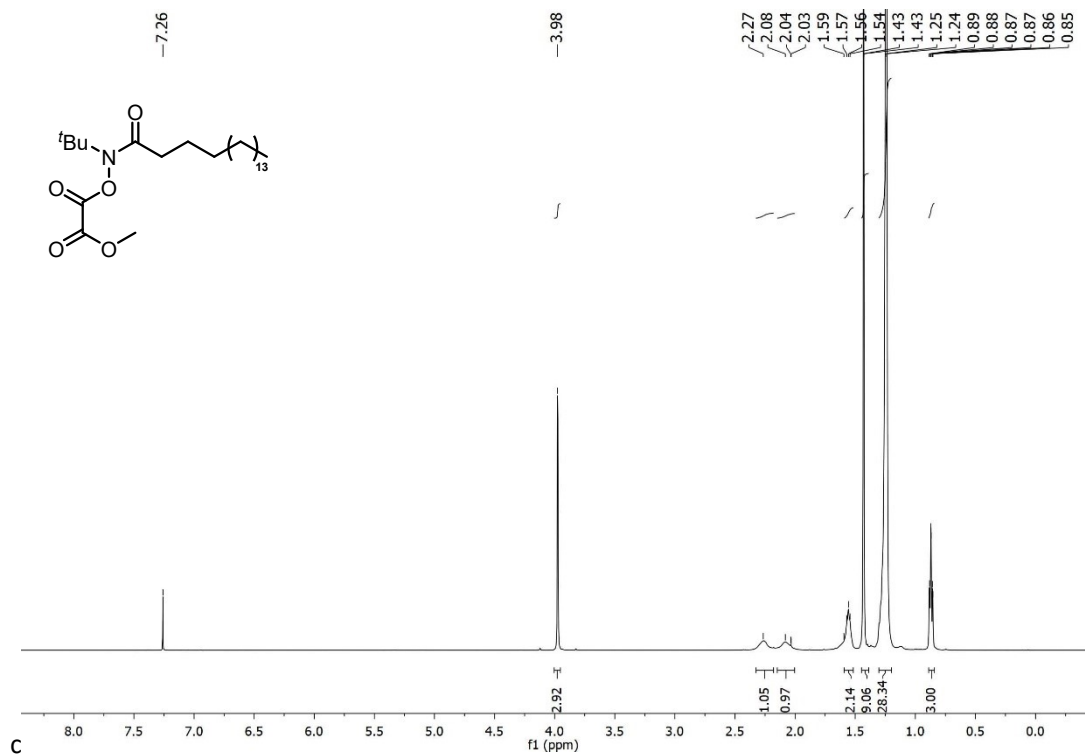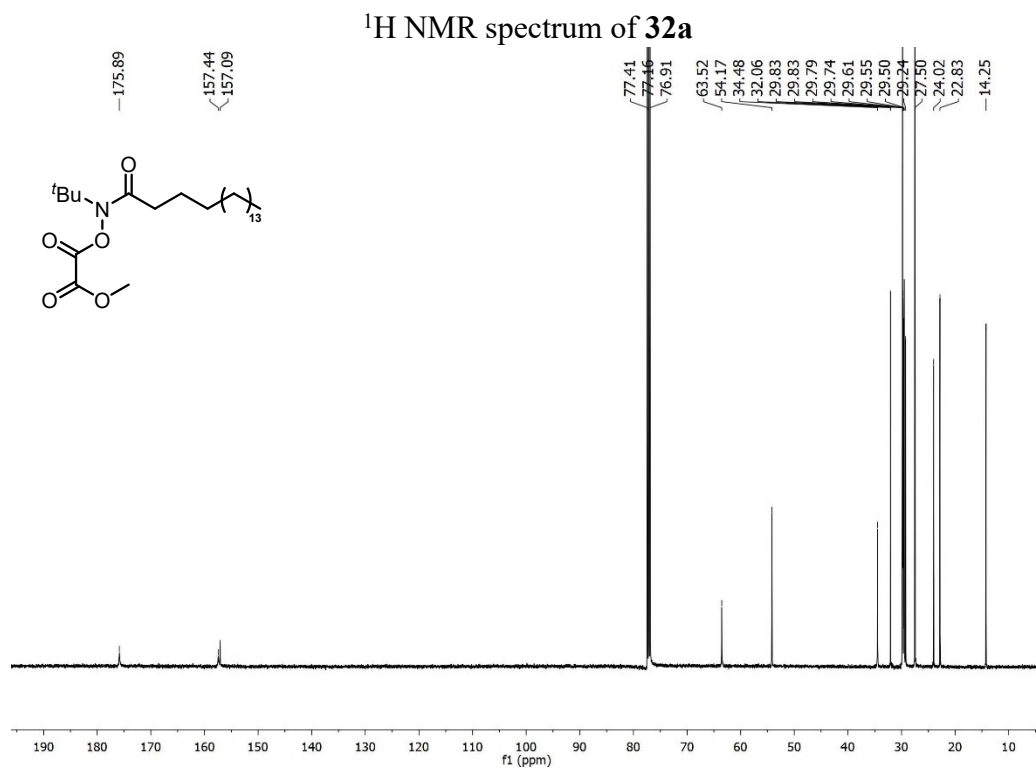

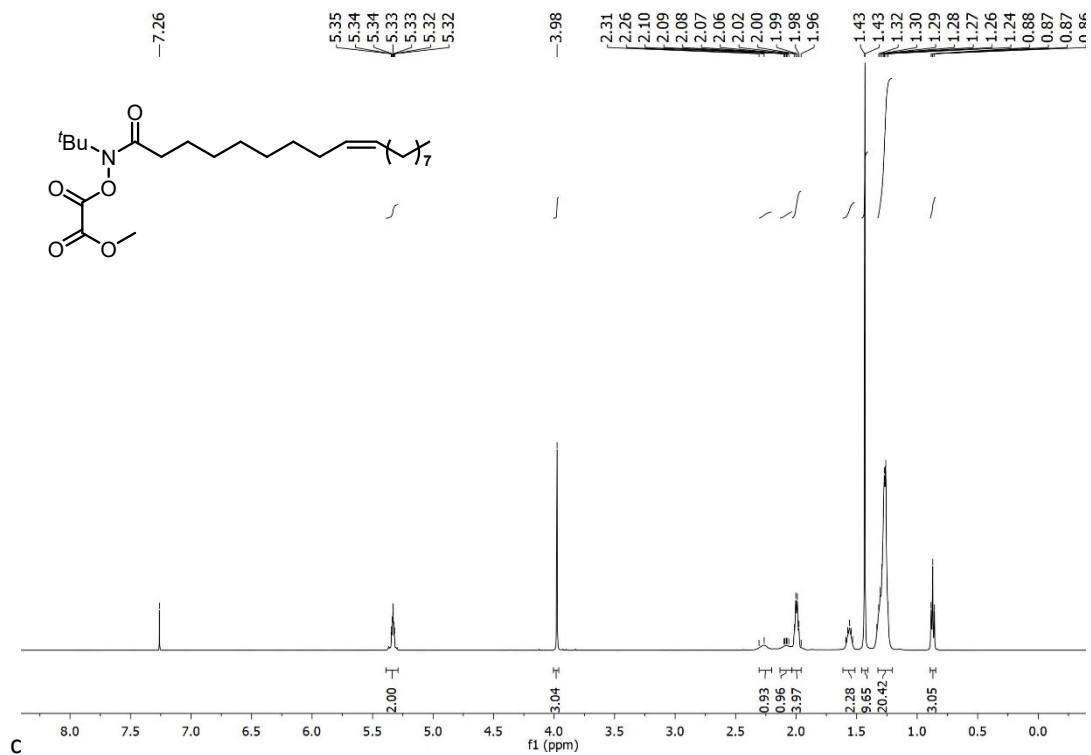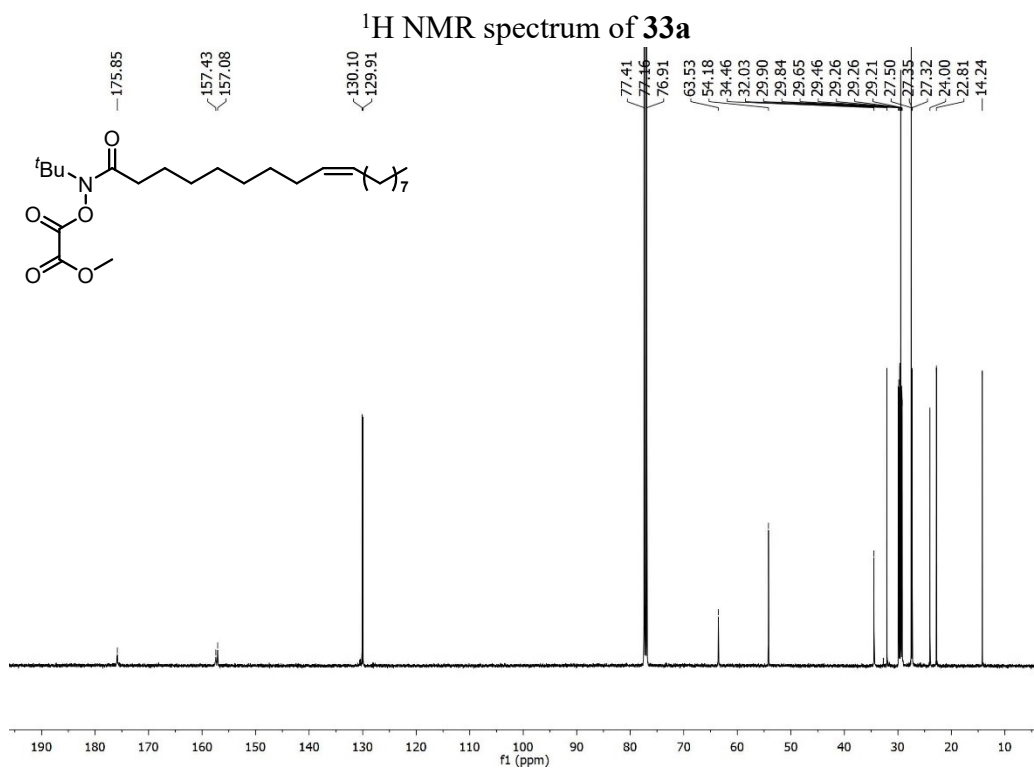

**<sup>13</sup>C NMR spectrum of 33a**



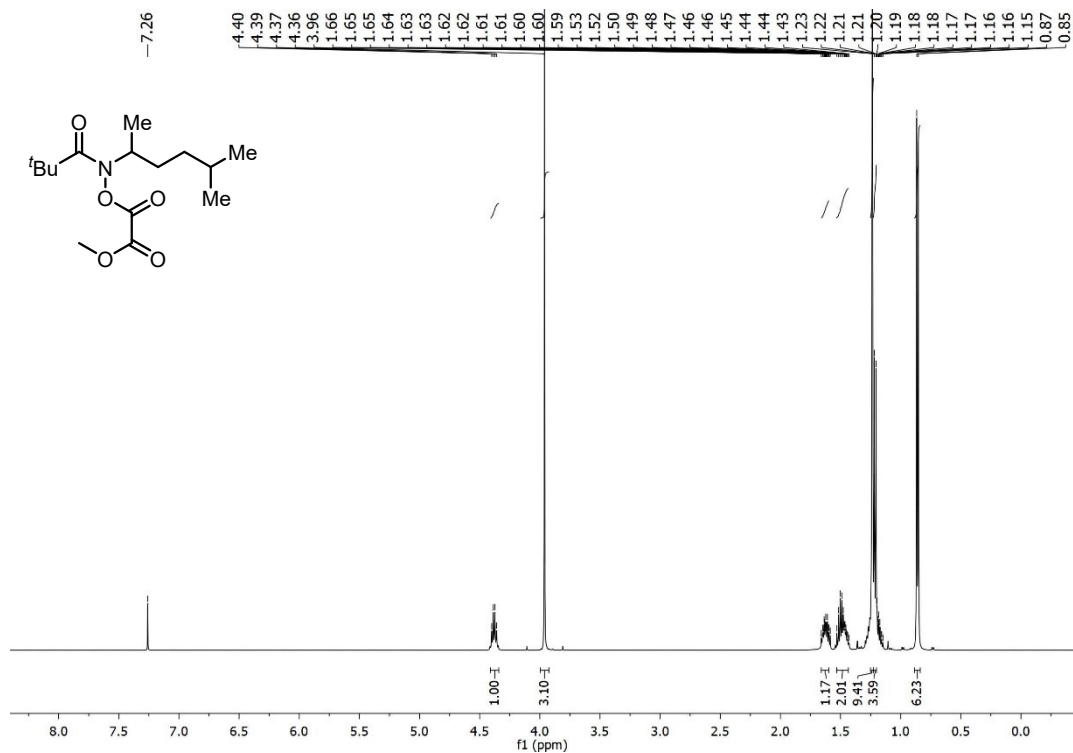

<sup>1</sup>H NMR spectrum of **35a**

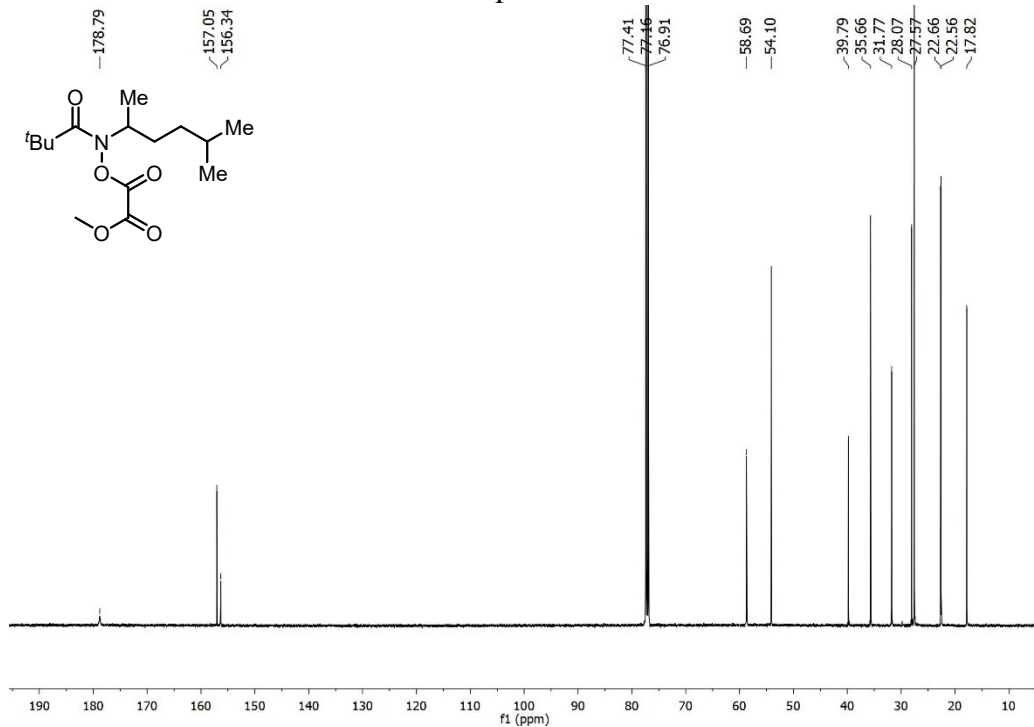

<sup>13</sup>C NMR spectrum of **35a**

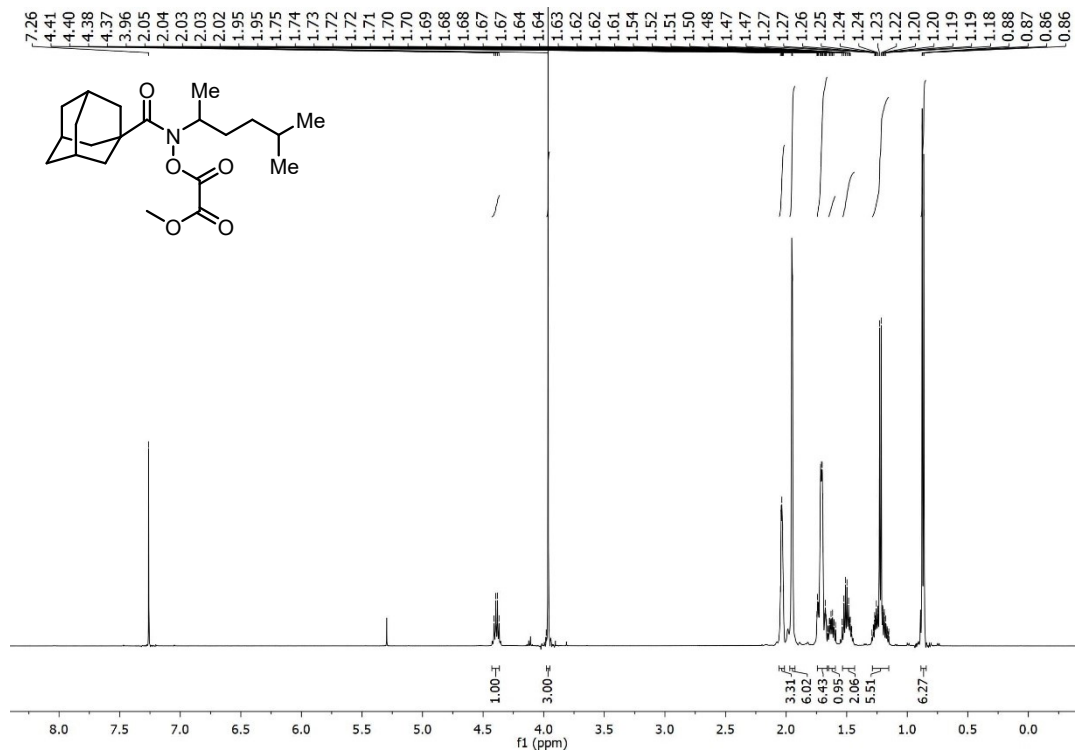

<sup>1</sup>H NMR spectrum of 36a

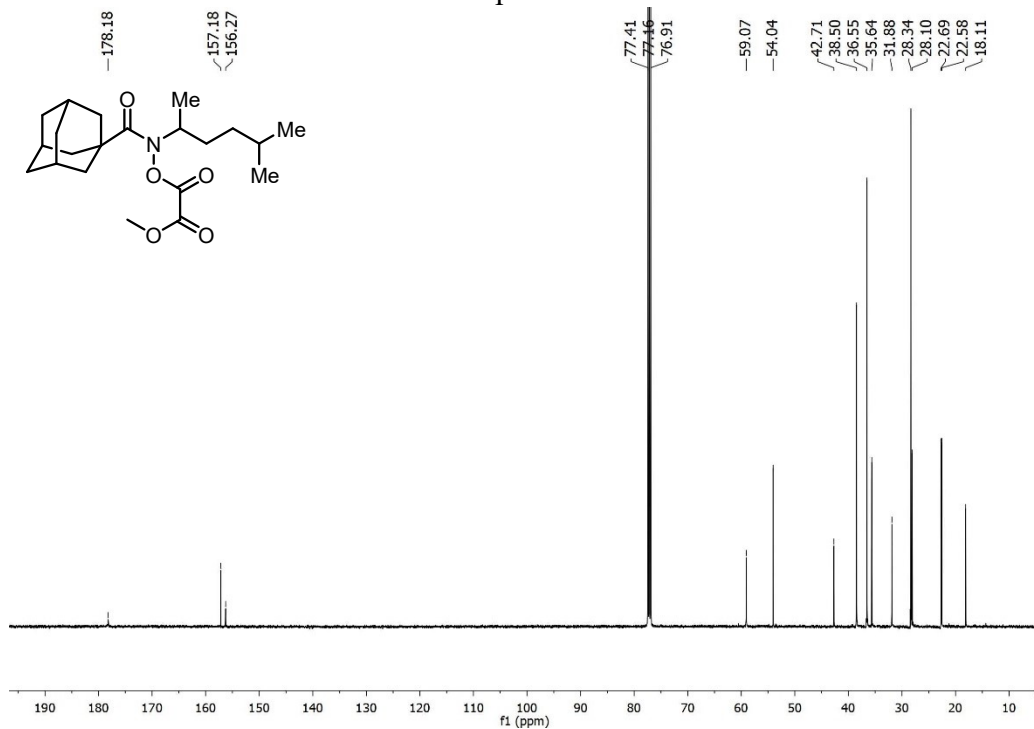

<sup>13</sup>C NMR spectrum of 36a

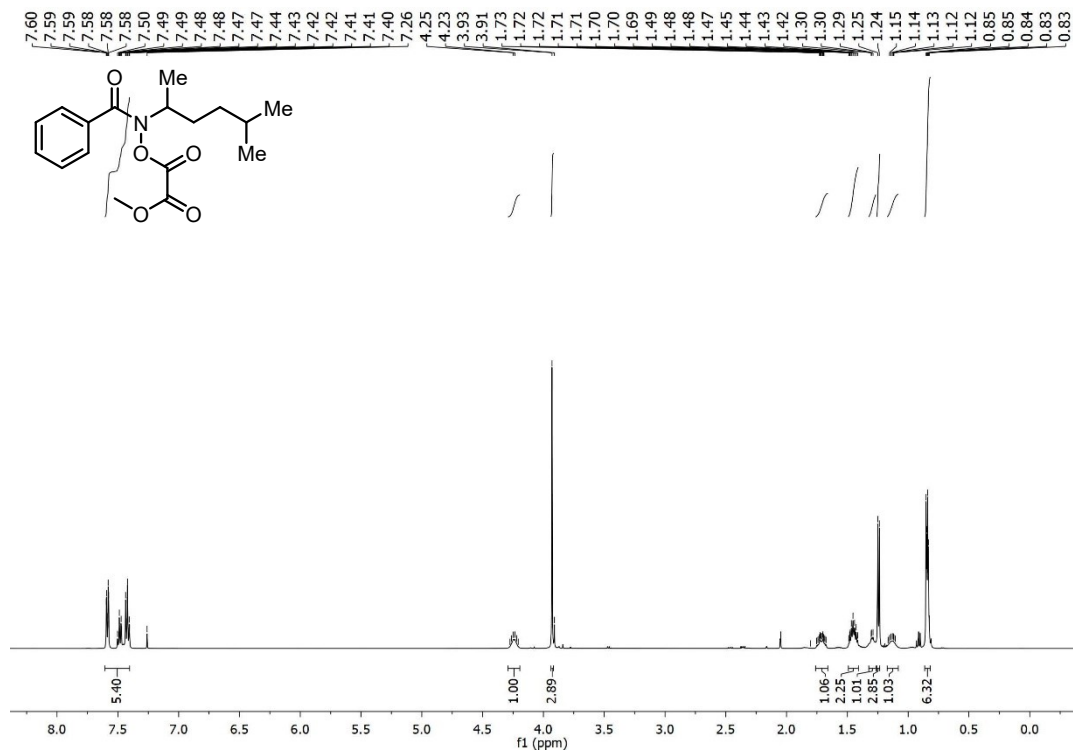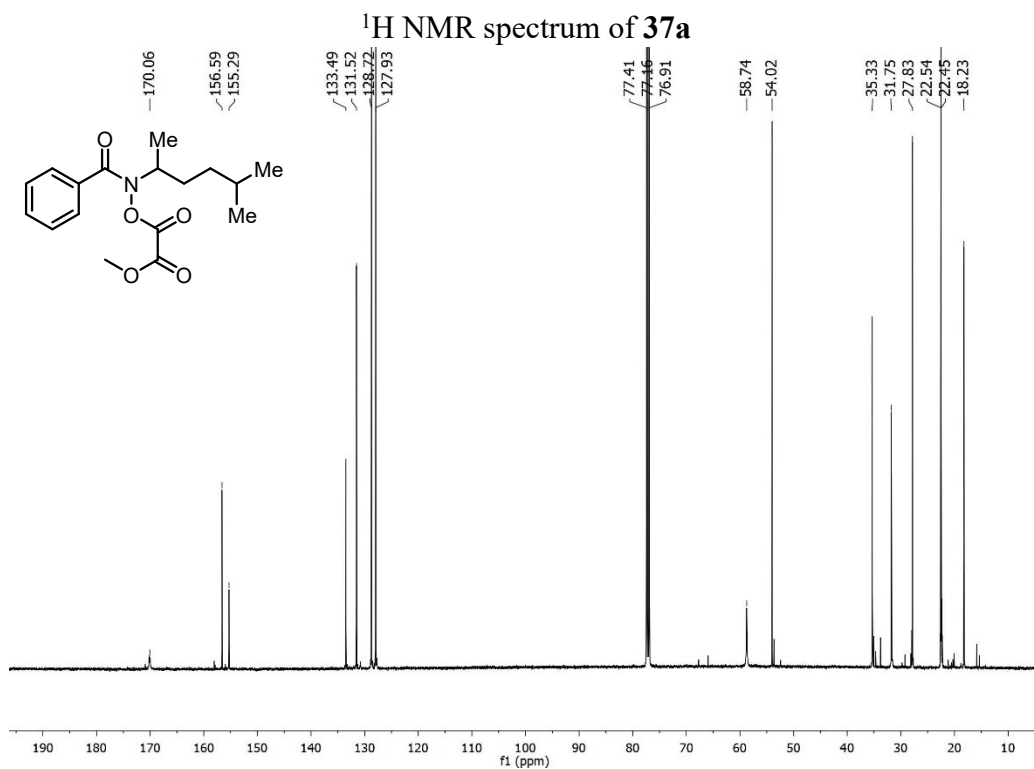

<sup>13</sup>C NMR spectrum of **37a**



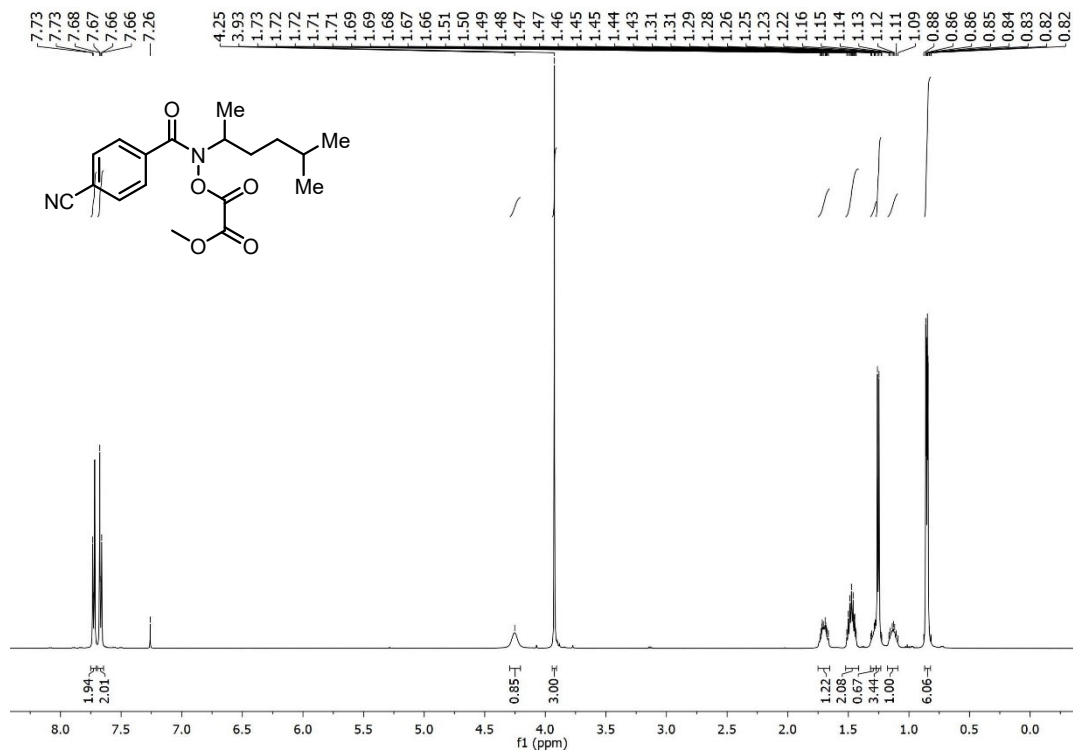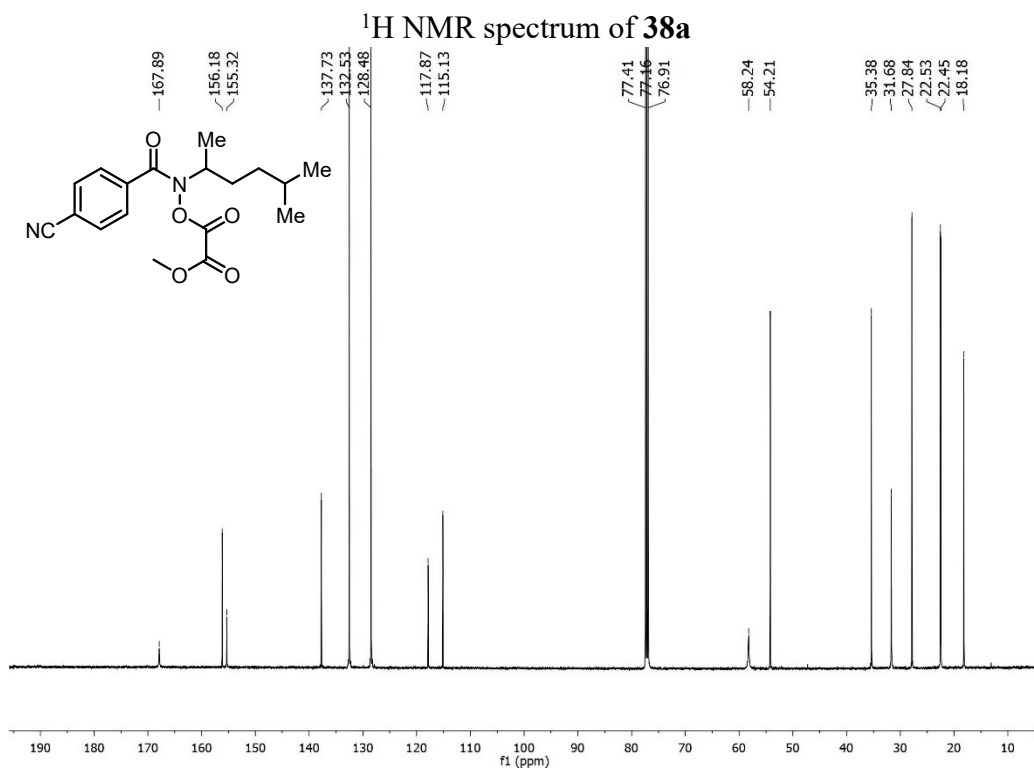

<sup>13</sup>C NMR spectrum of 38a

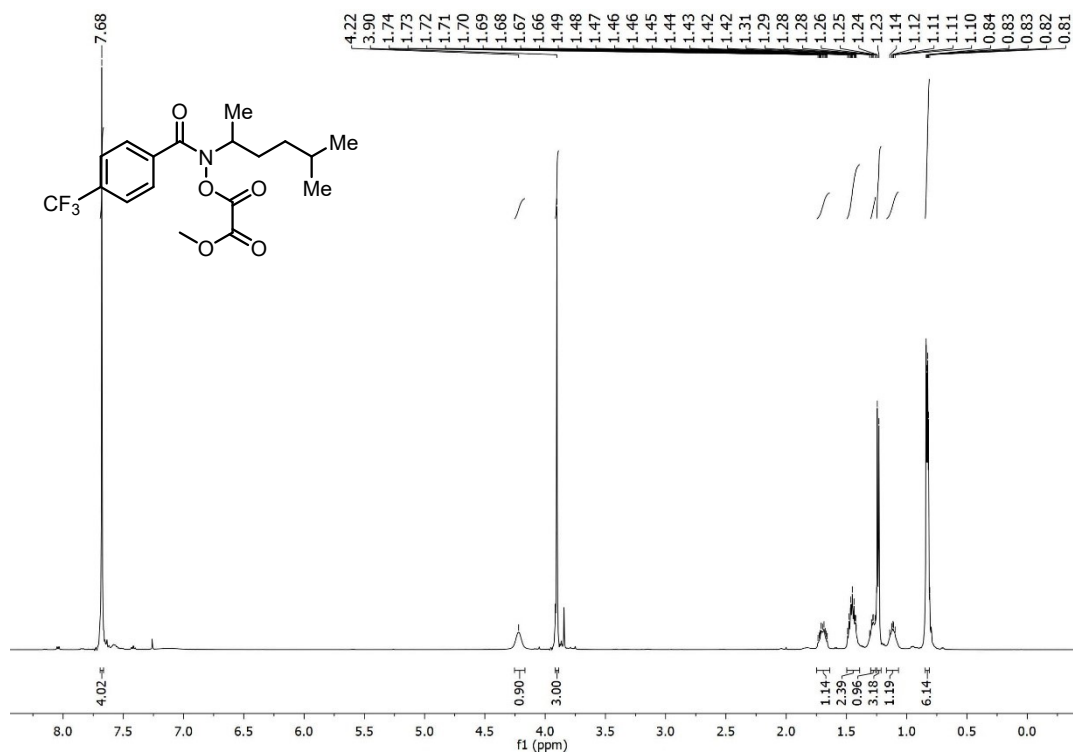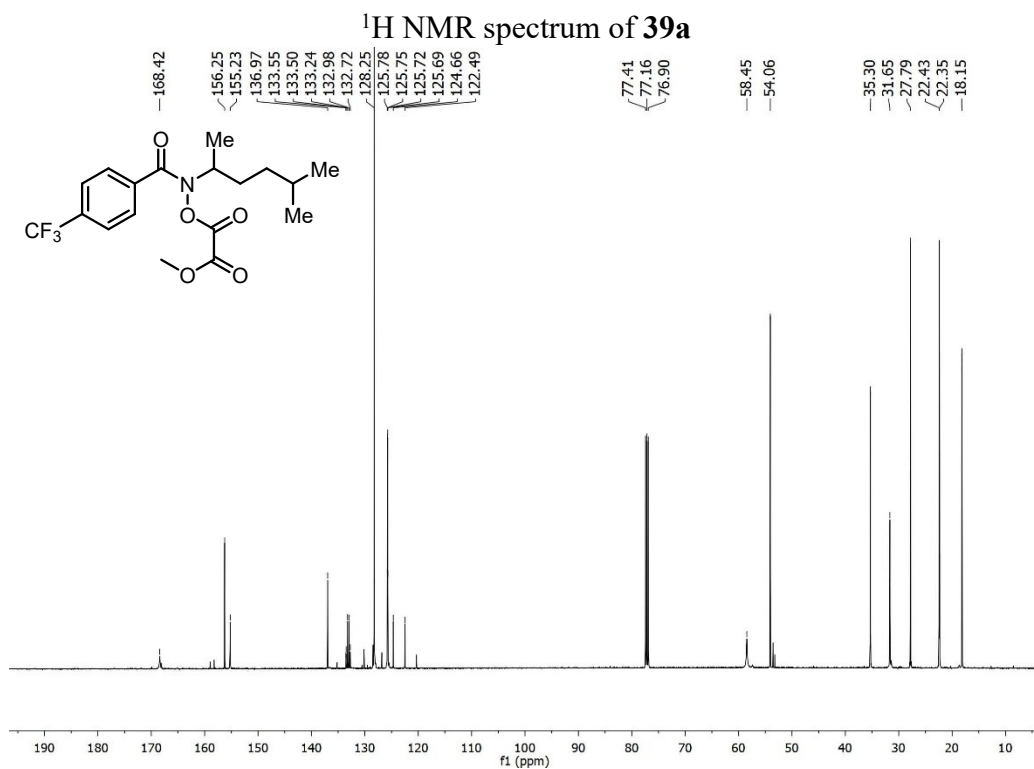

**<sup>13</sup>C NMR spectrum of 39a**

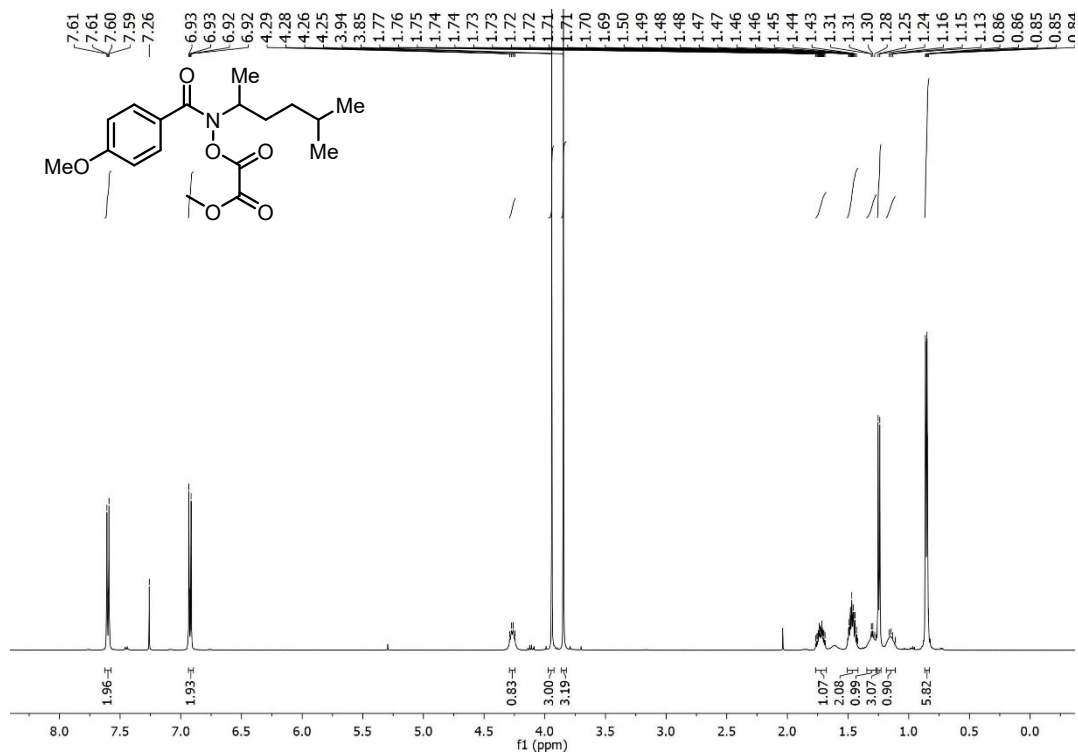

**<sup>1</sup>H NMR spectrum of 40a**

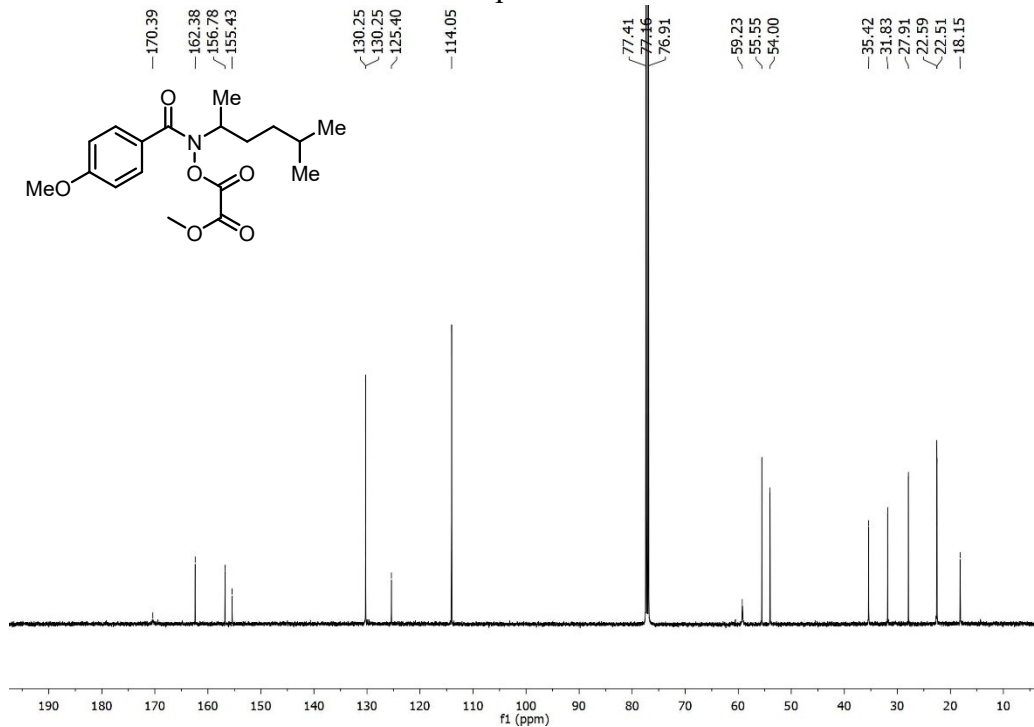

**<sup>13</sup>C NMR spectrum of 40a**

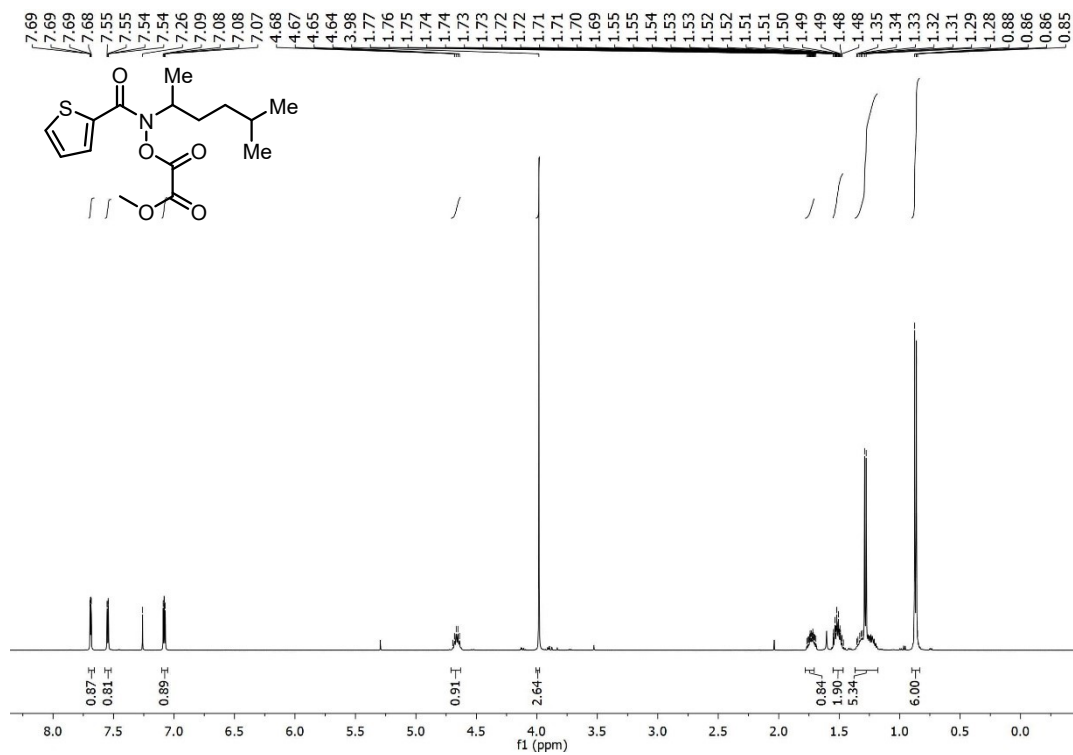

<sup>1</sup>H NMR spectrum of 41a

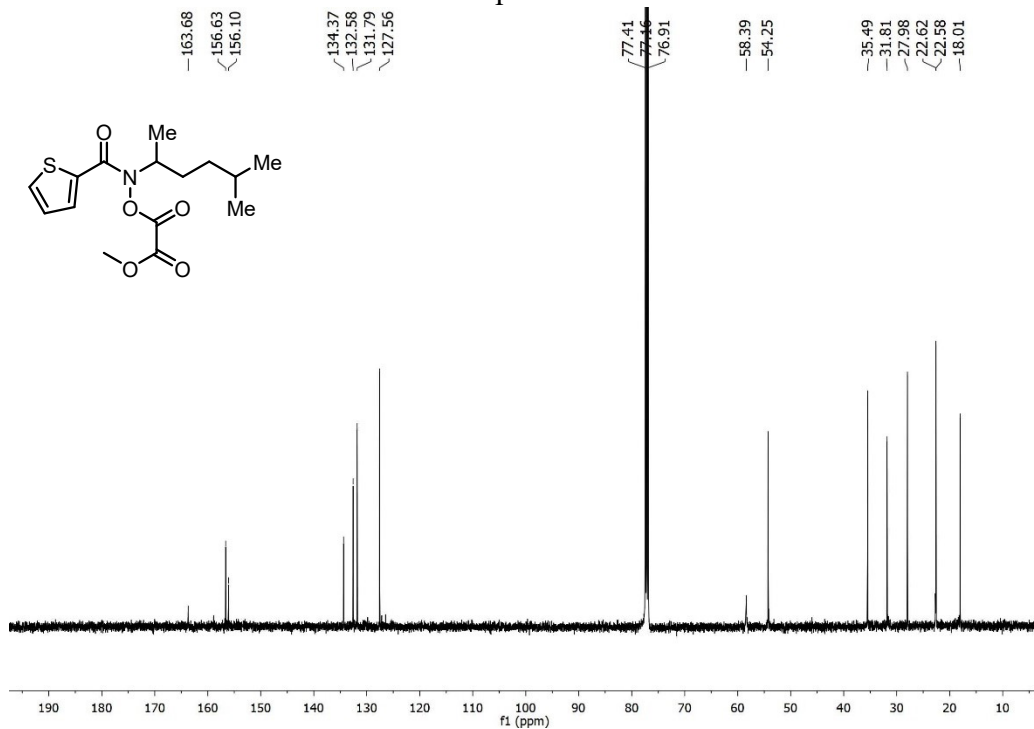

<sup>13</sup>C NMR spectrum of 41a

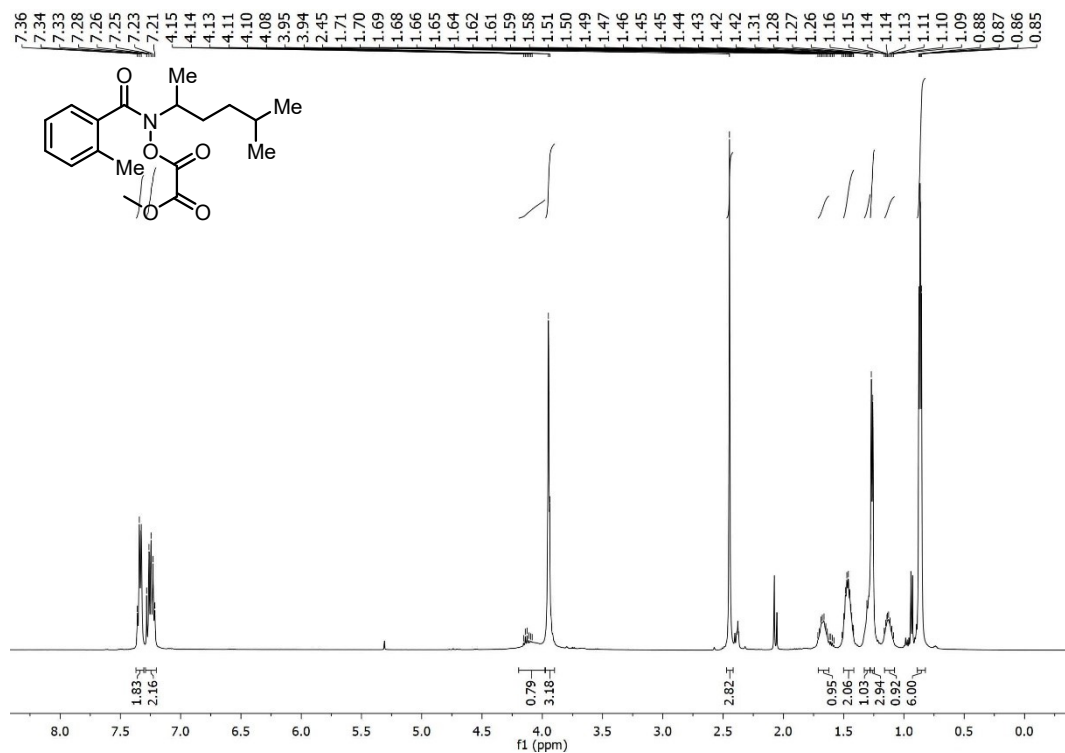

<sup>1</sup>H NMR spectrum of 42a

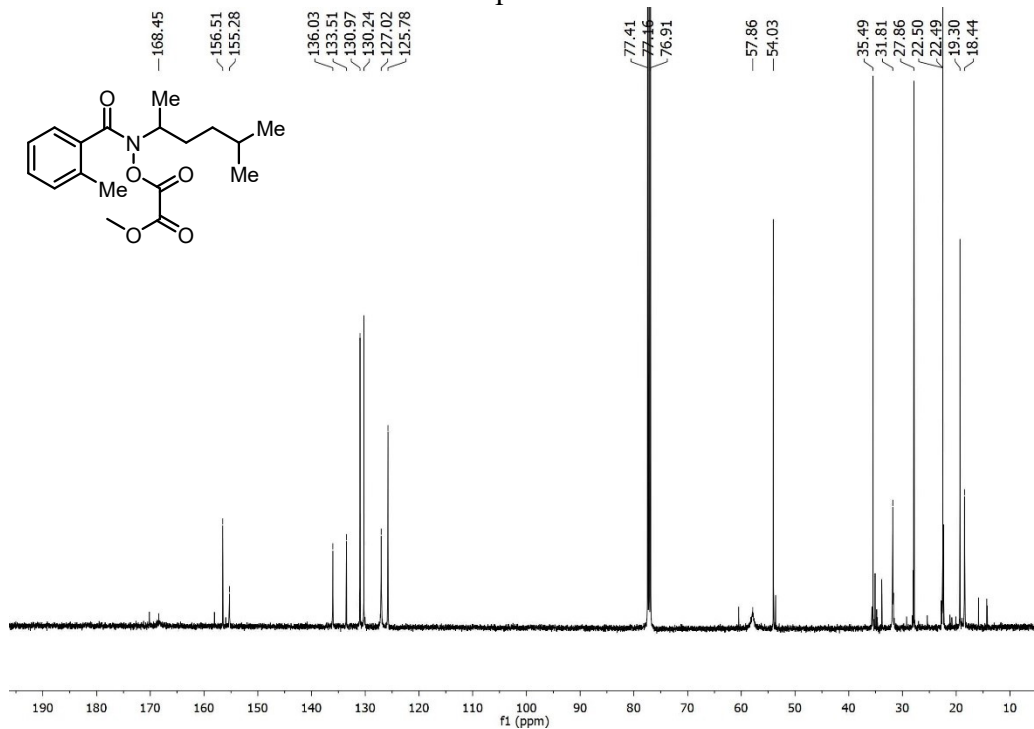

<sup>13</sup>C NMR spectrum of 42a

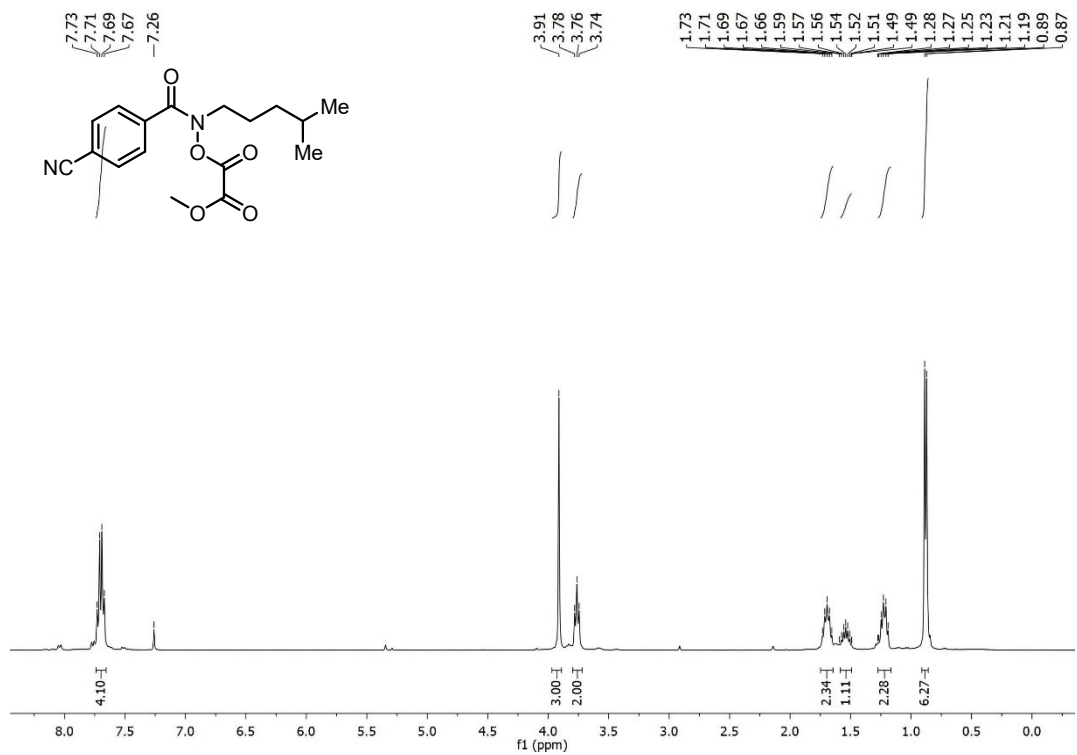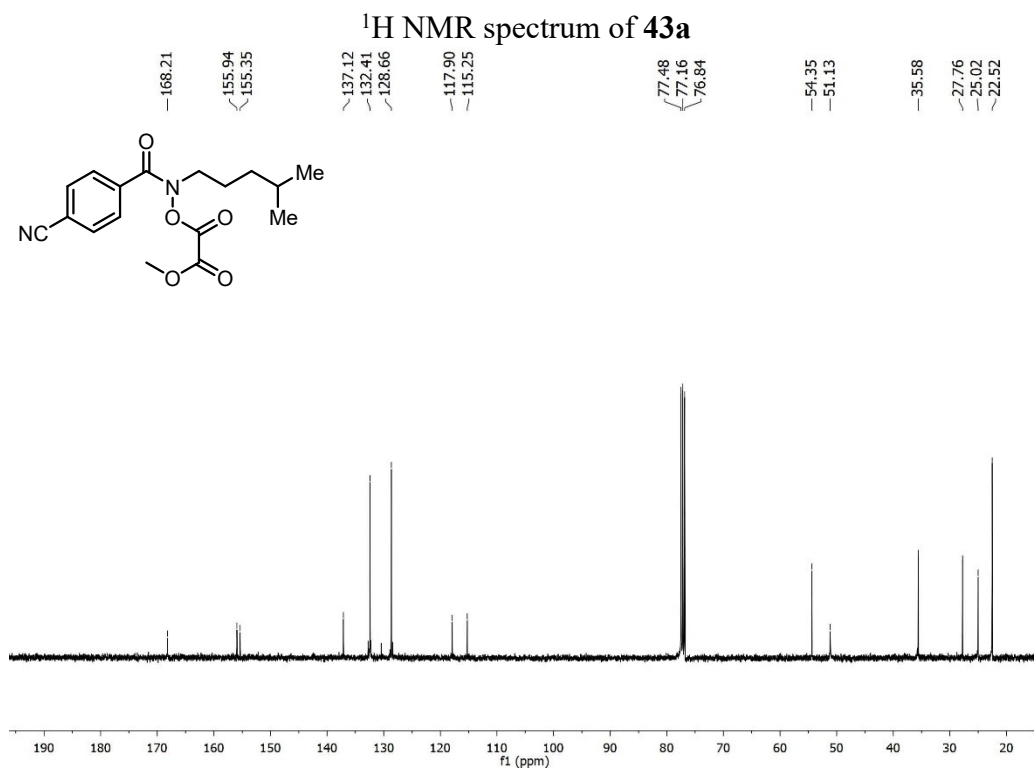

**<sup>13</sup>C NMR spectrum of 43a**

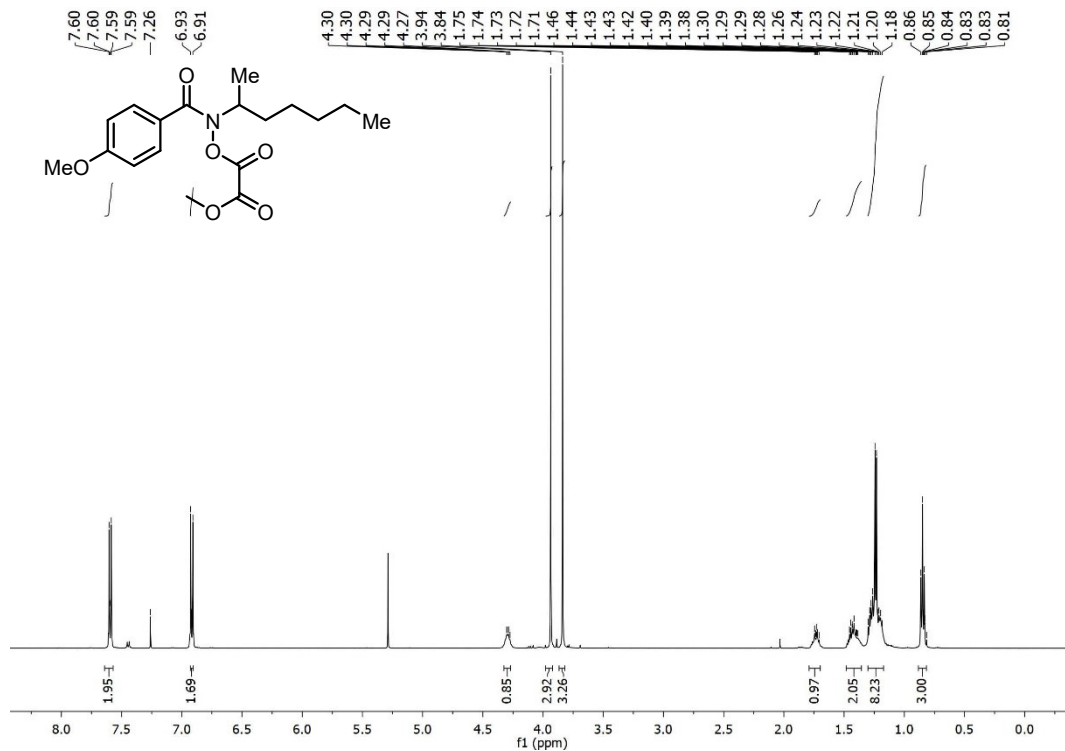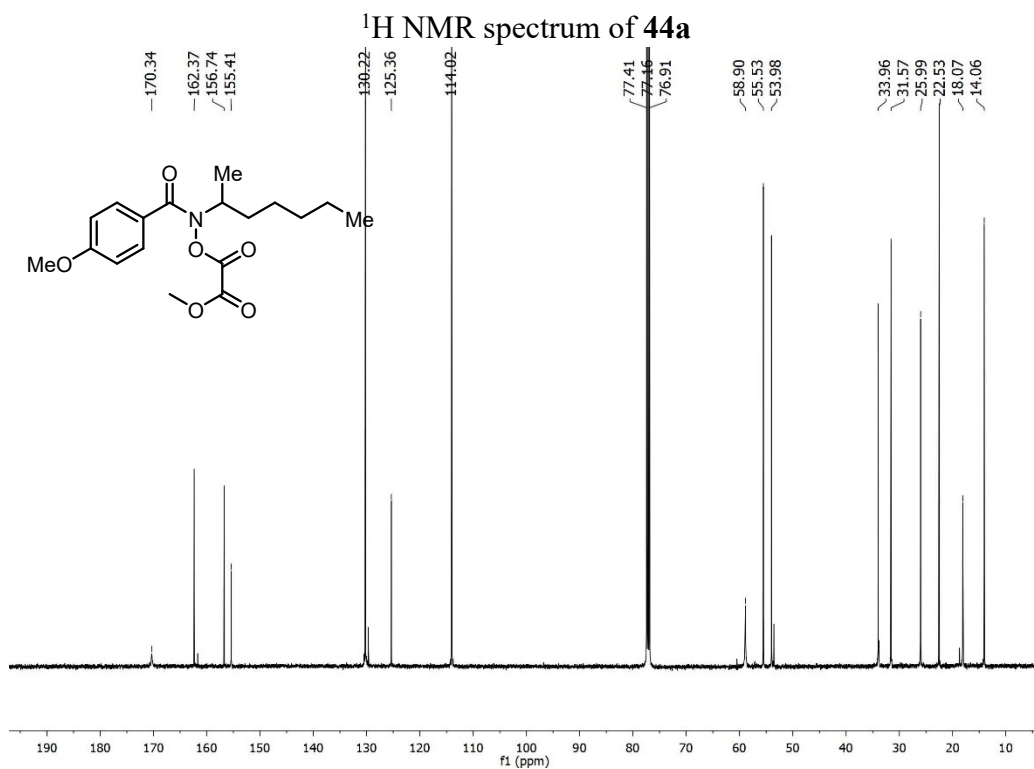

<sup>13</sup>C NMR spectrum of 44a

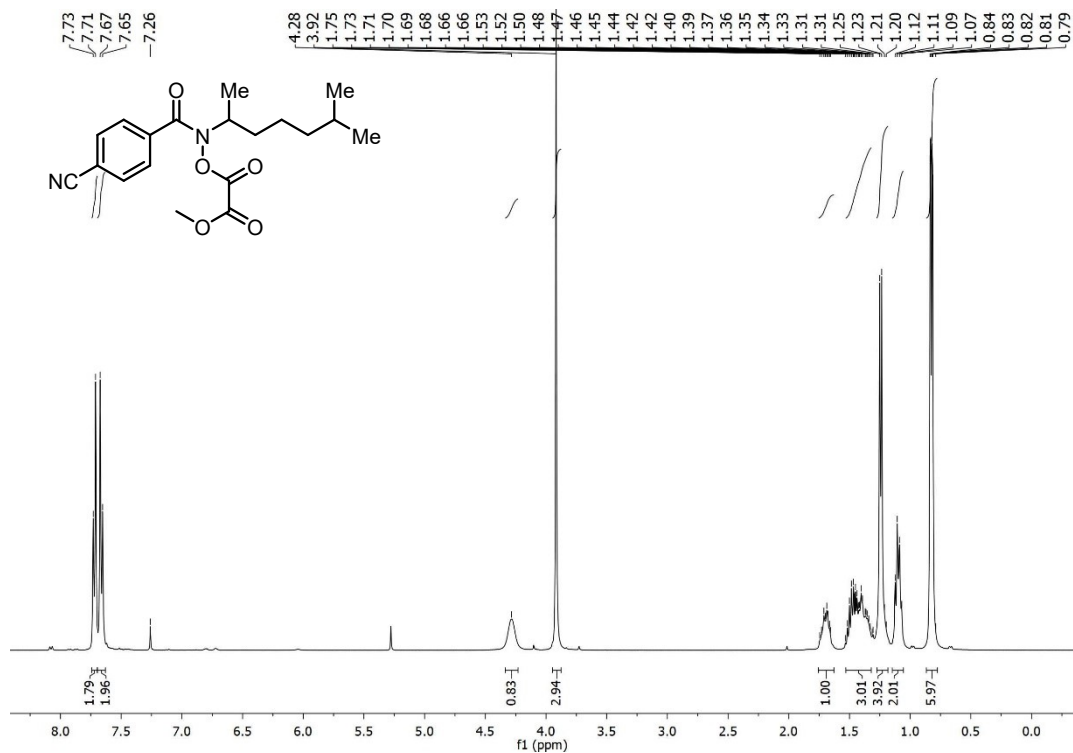

**<sup>1</sup>H NMR spectrum of 45a**

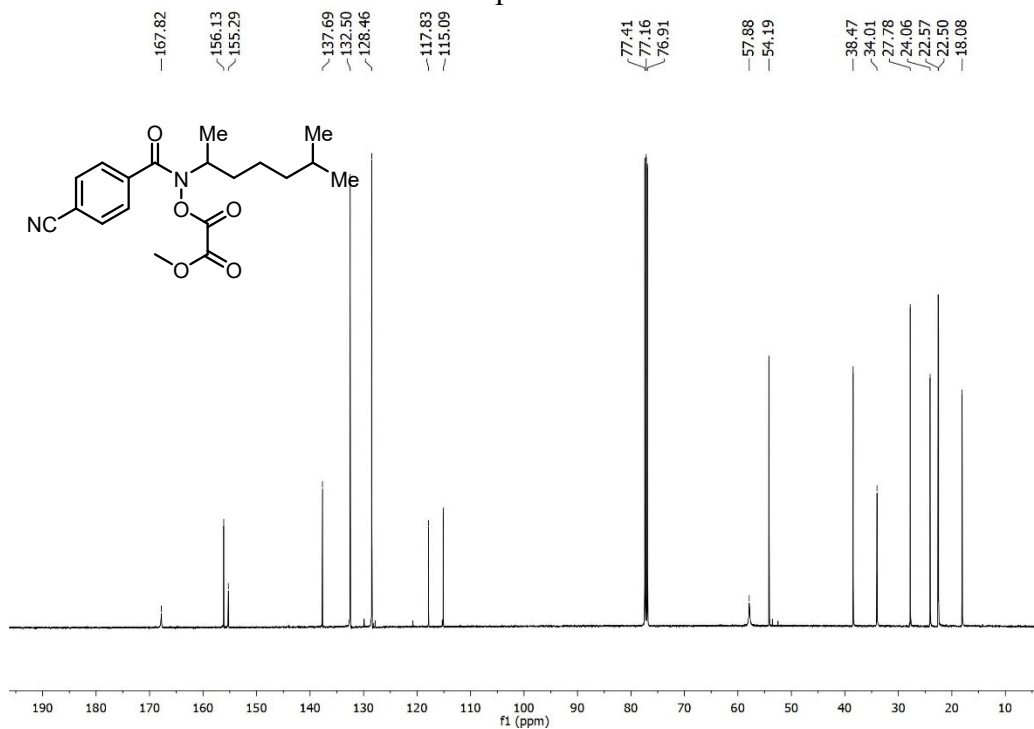

**<sup>13</sup>C NMR spectrum of 45a**



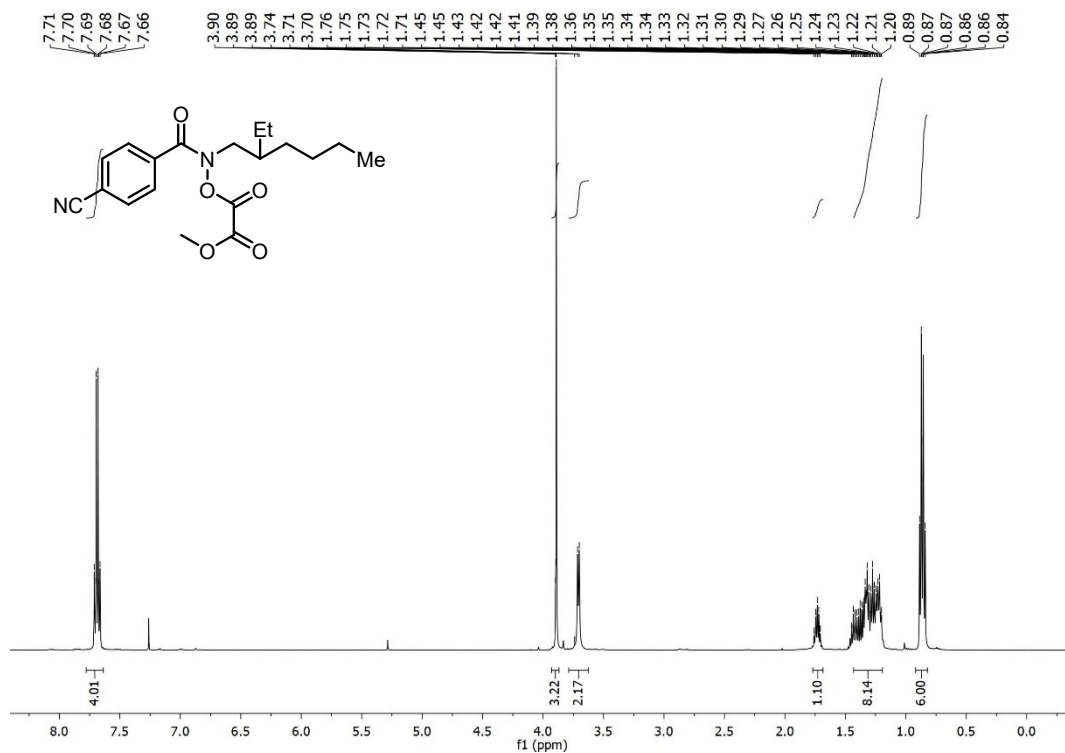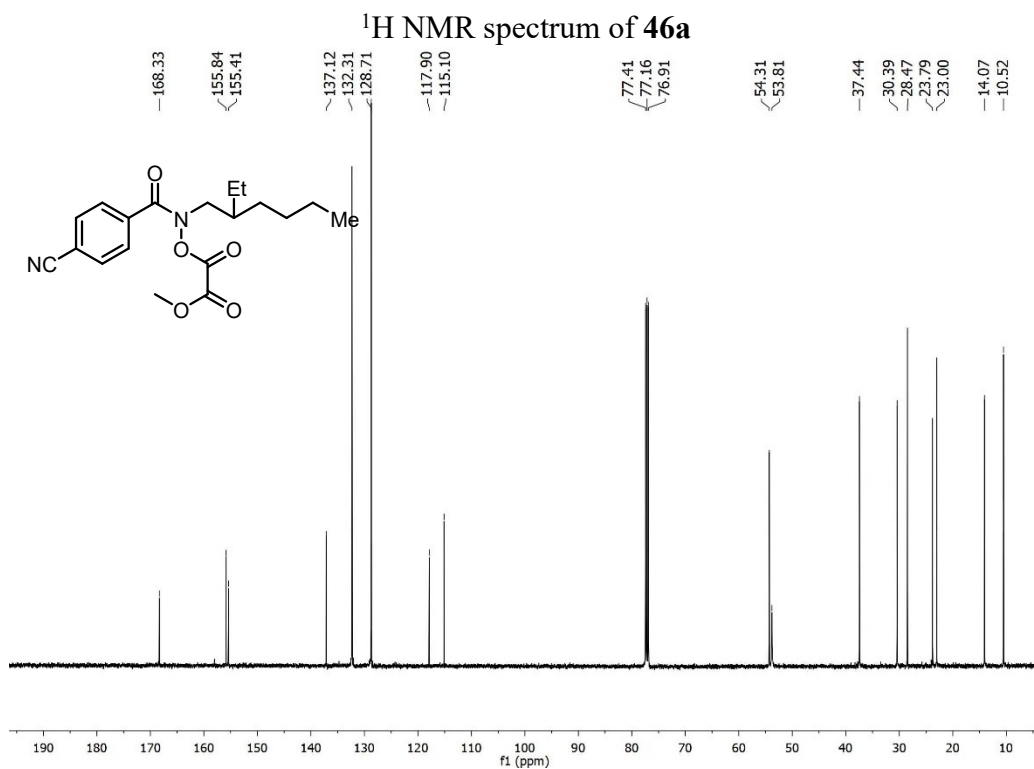

**<sup>13</sup>C NMR spectrum of 46a**

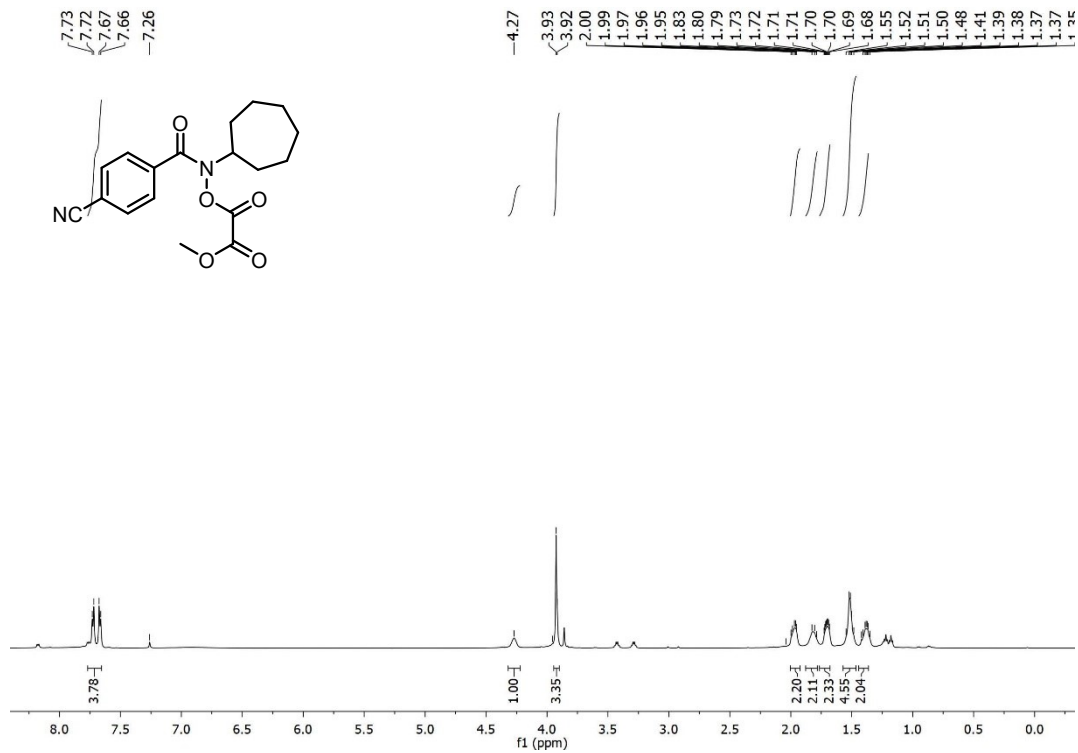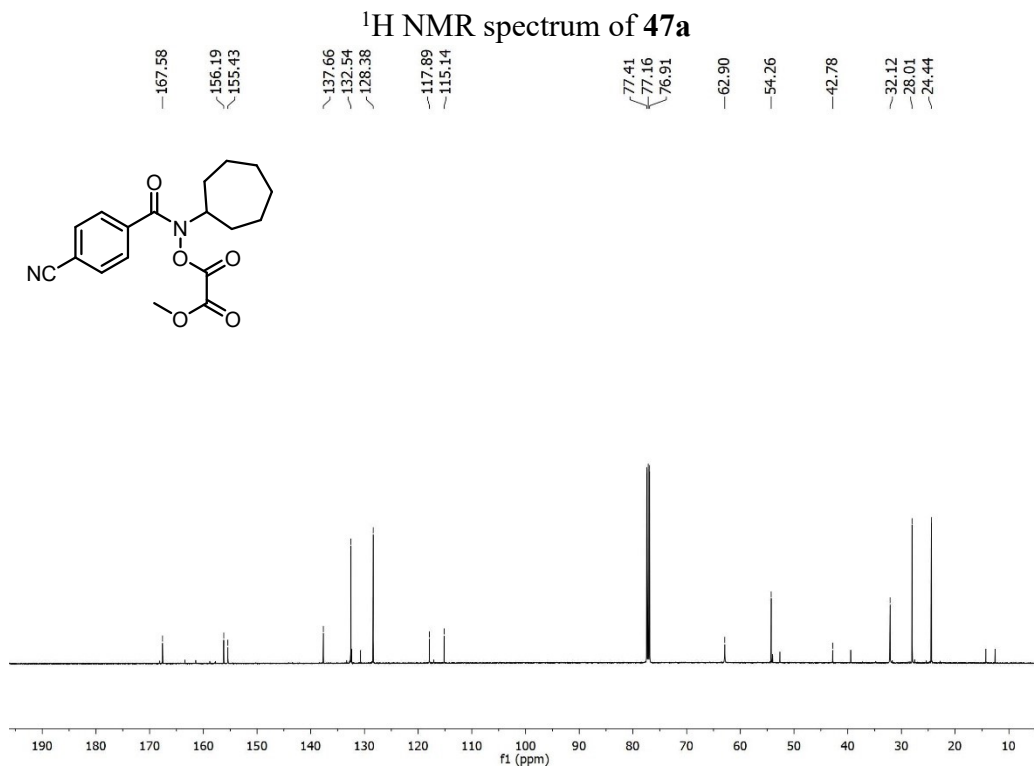

**<sup>13</sup>C NMR spectrum of 47a**



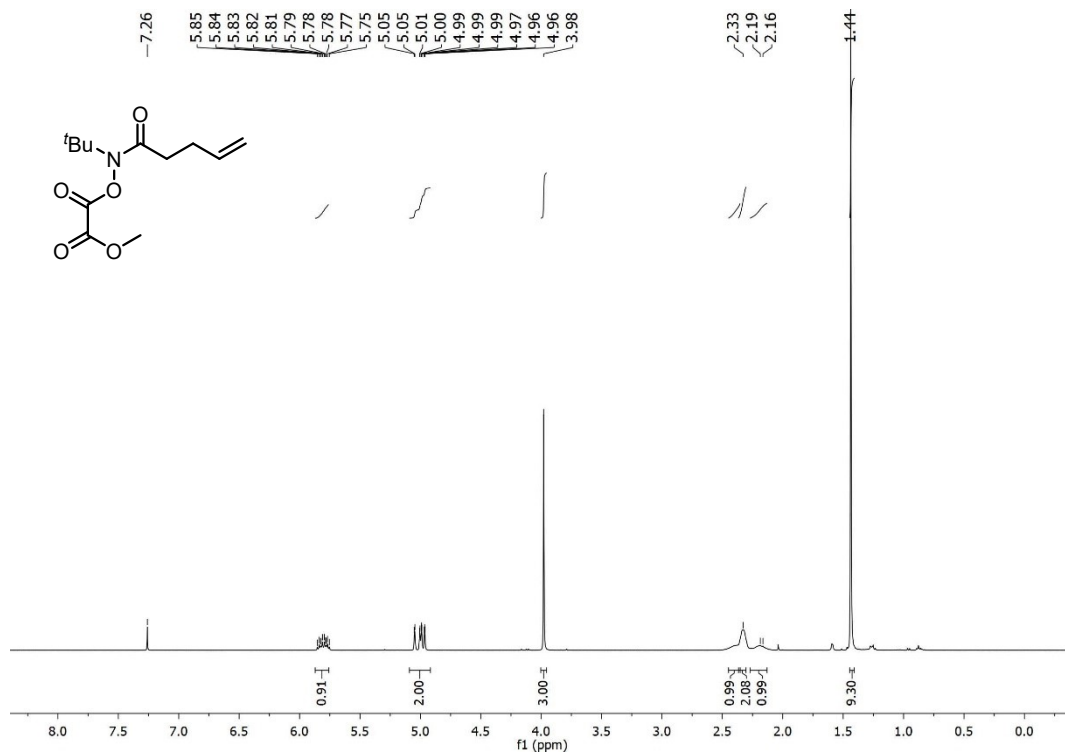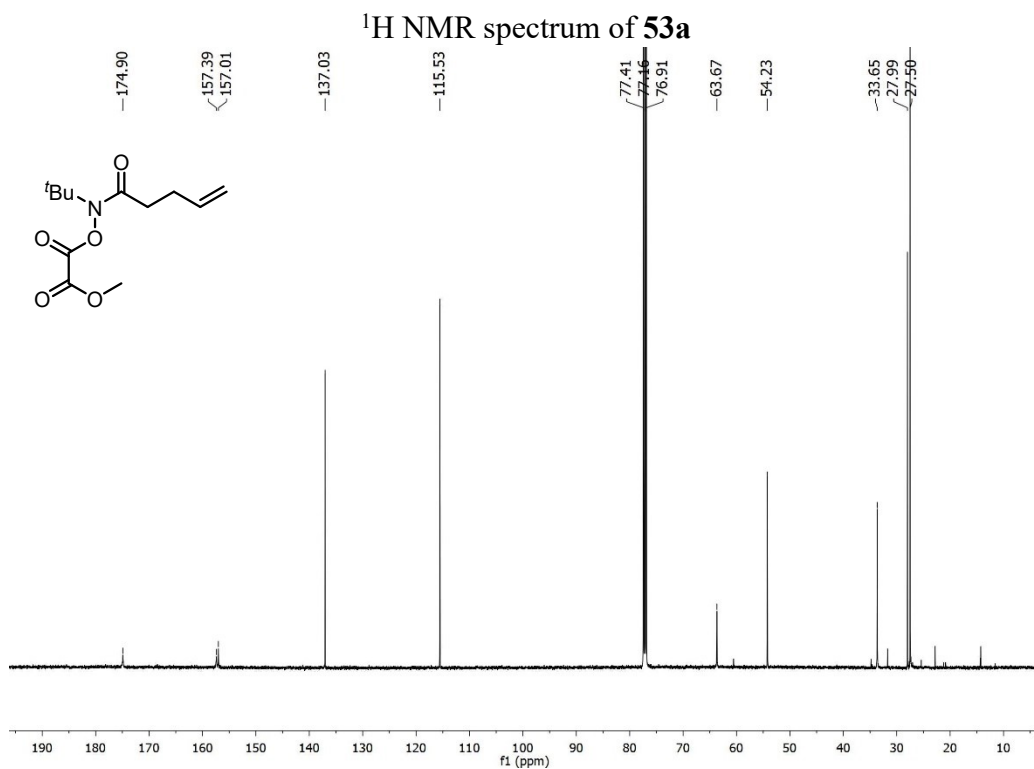

**<sup>13</sup>C NMR spectrum of 53a**

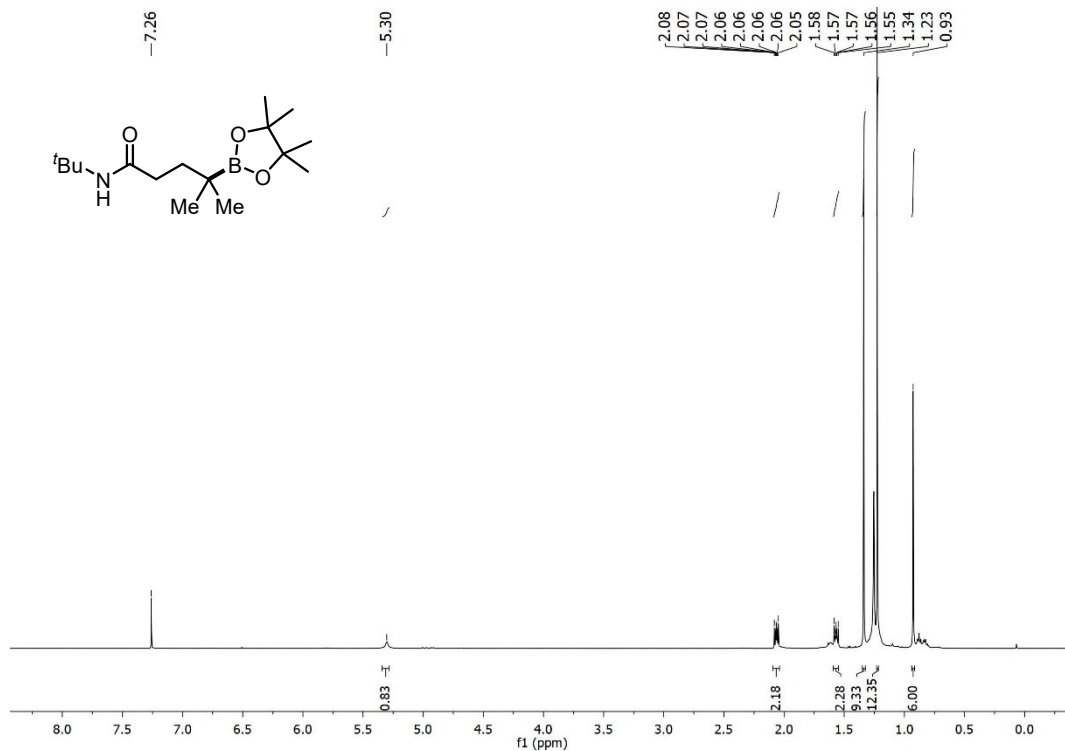

**<sup>1</sup>H NMR spectrum of 11**

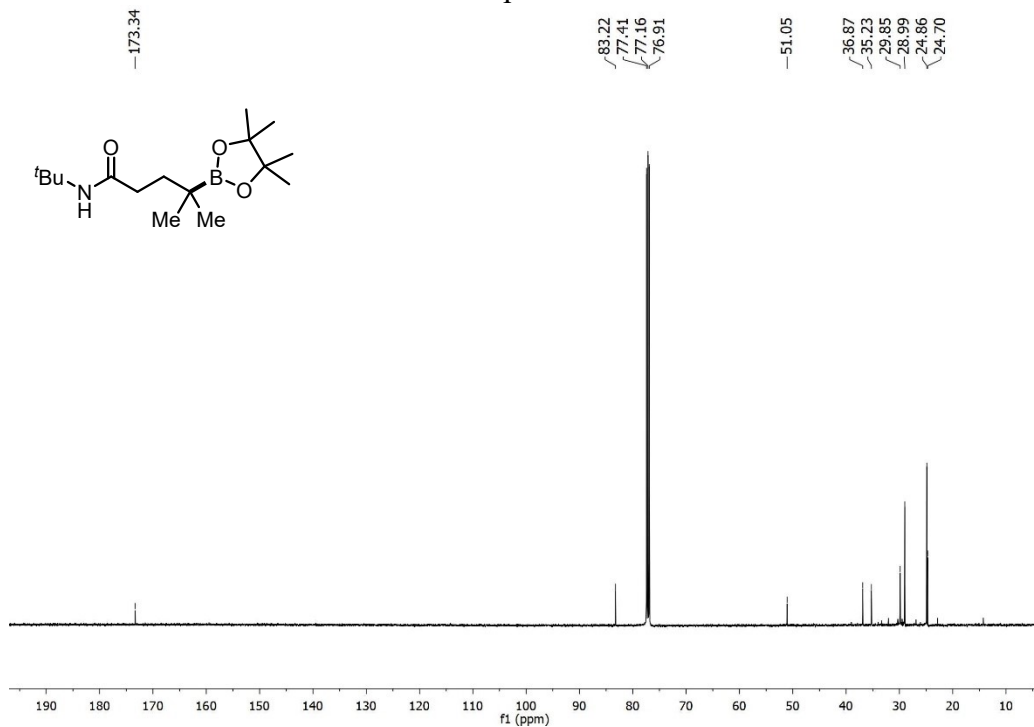

**<sup>13</sup>C NMR spectrum of 11**

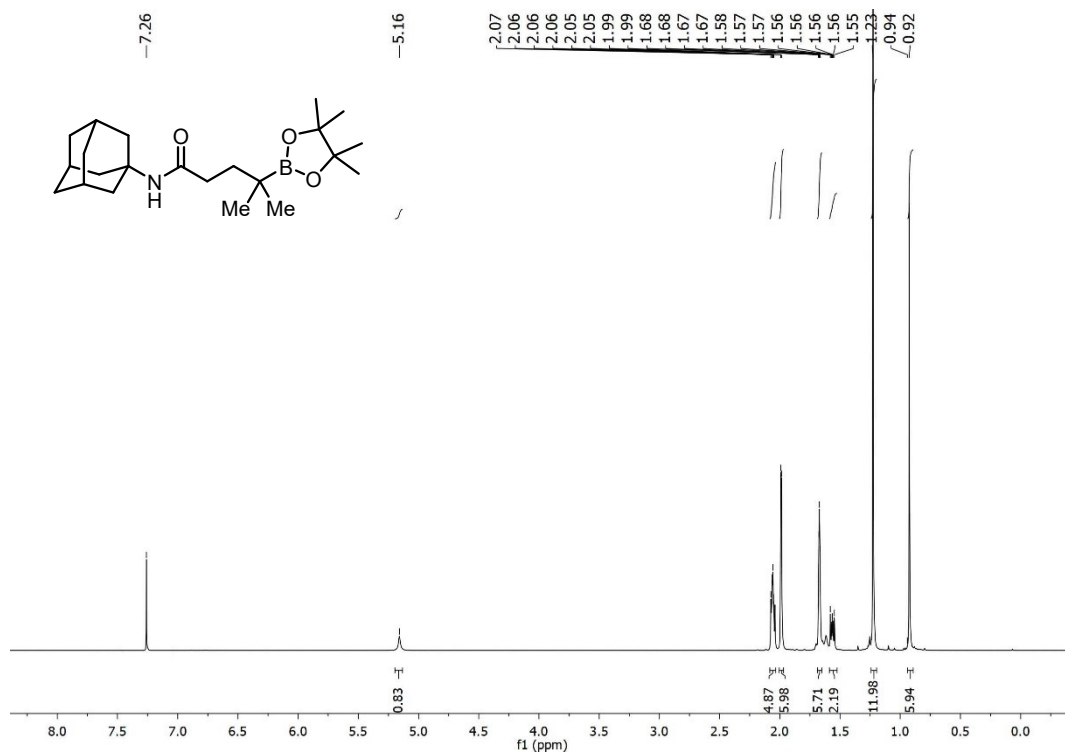

**<sup>1</sup>H NMR spectrum of 12**

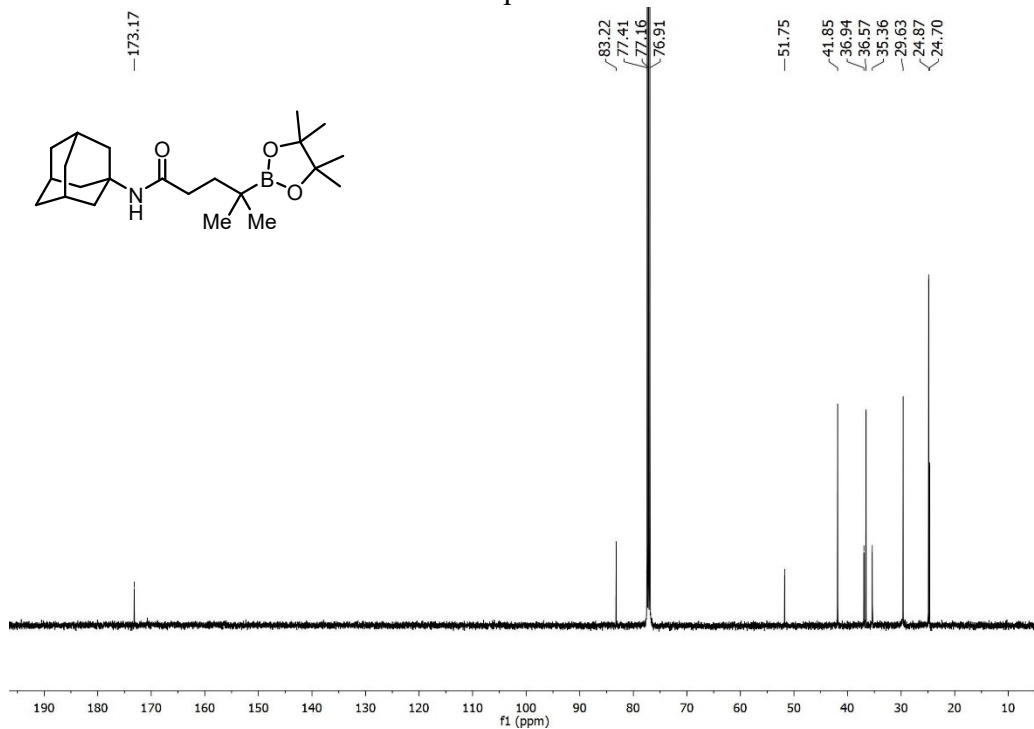

**<sup>13</sup>C NMR spectrum of 12**

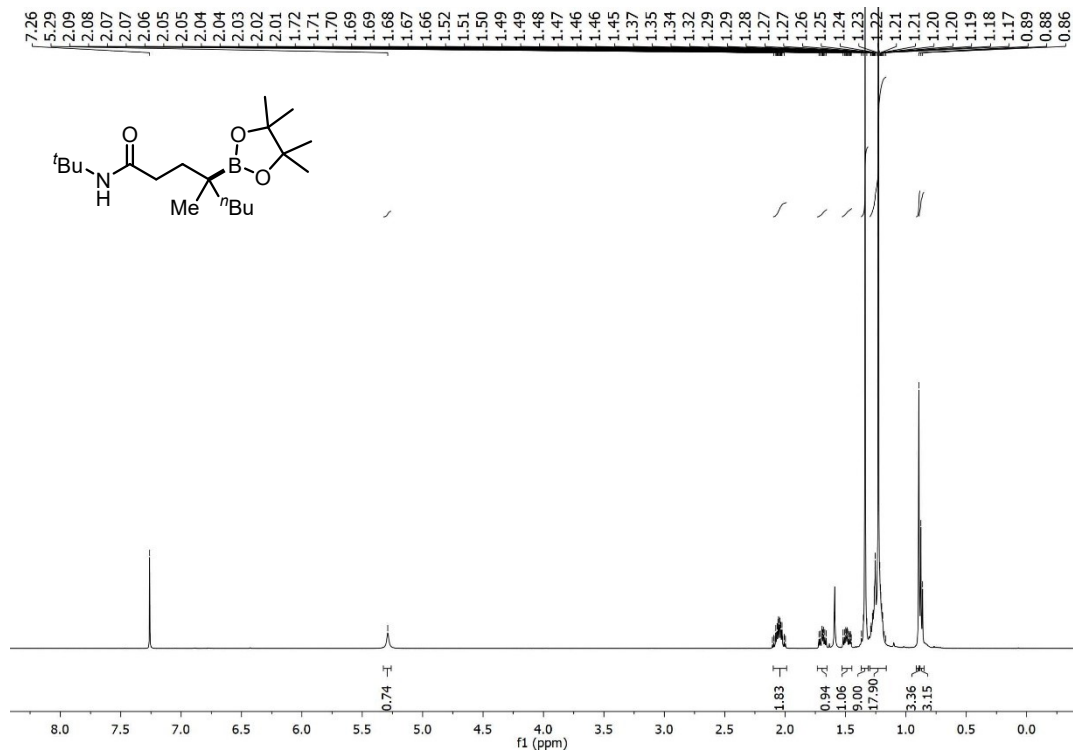

<sup>1</sup>H NMR spectrum of **13**

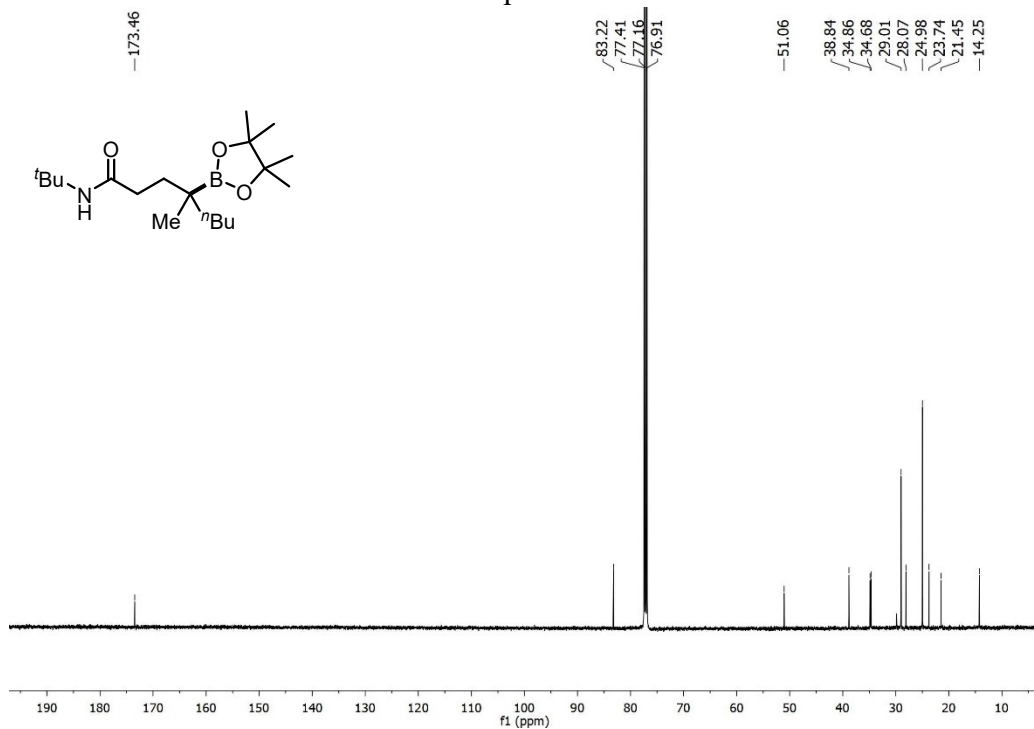

<sup>13</sup>C NMR spectrum of **13**

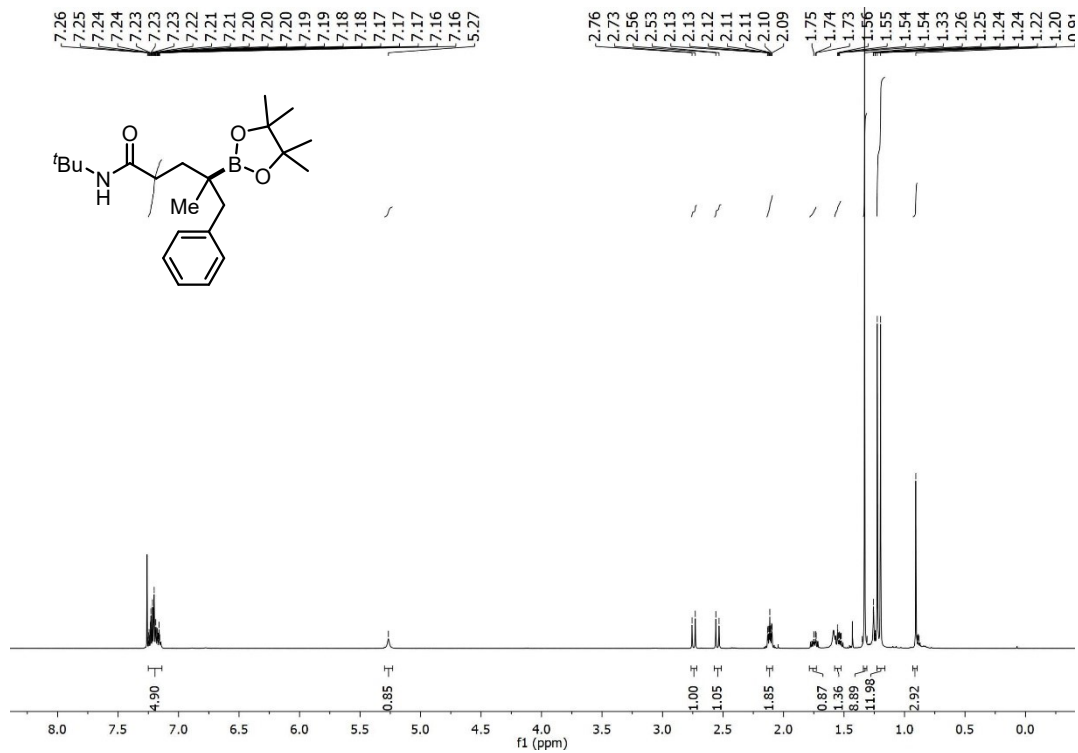

**<sup>1</sup>H NMR spectrum of 14**

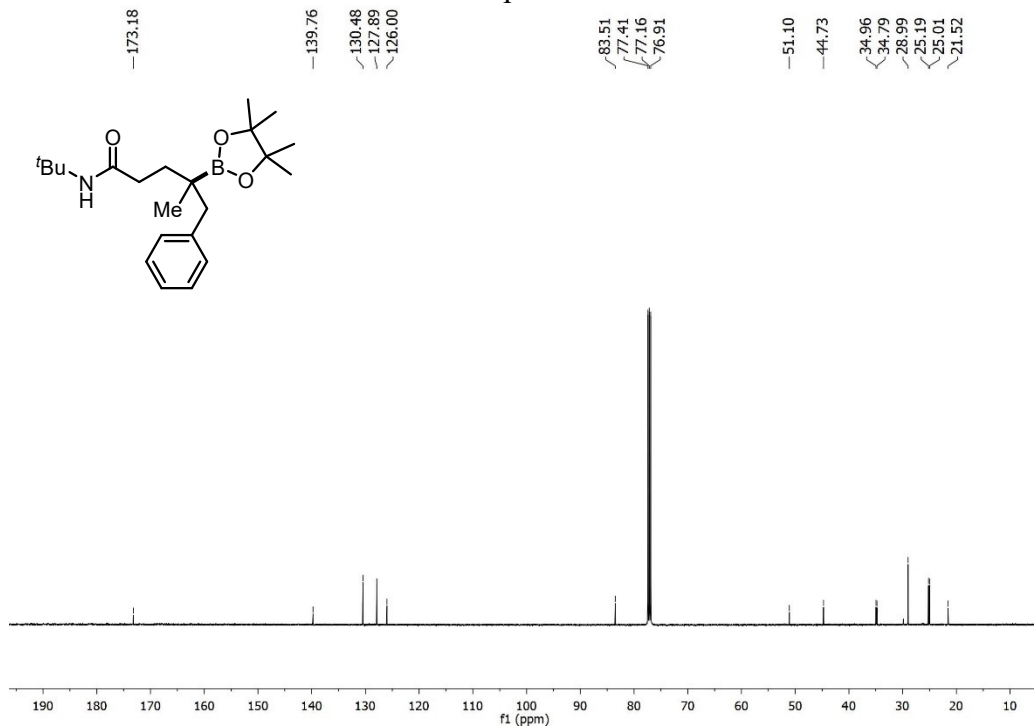

**<sup>13</sup>C NMR spectrum of 14**



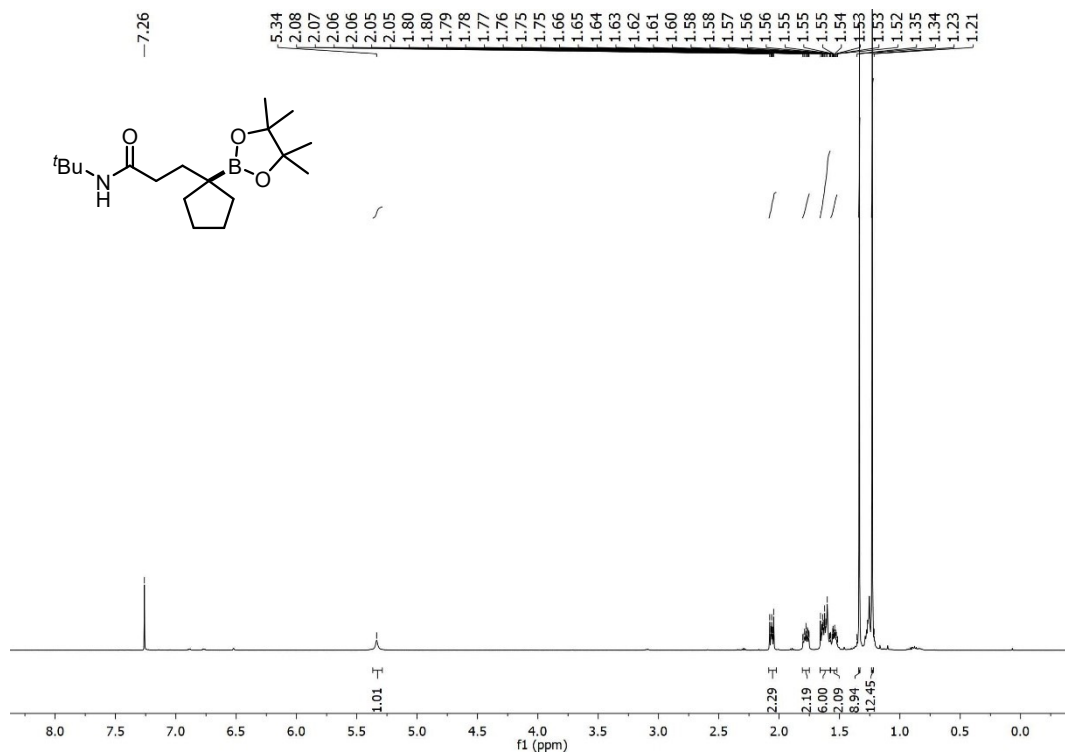

**<sup>1</sup>H NMR spectrum of 15**

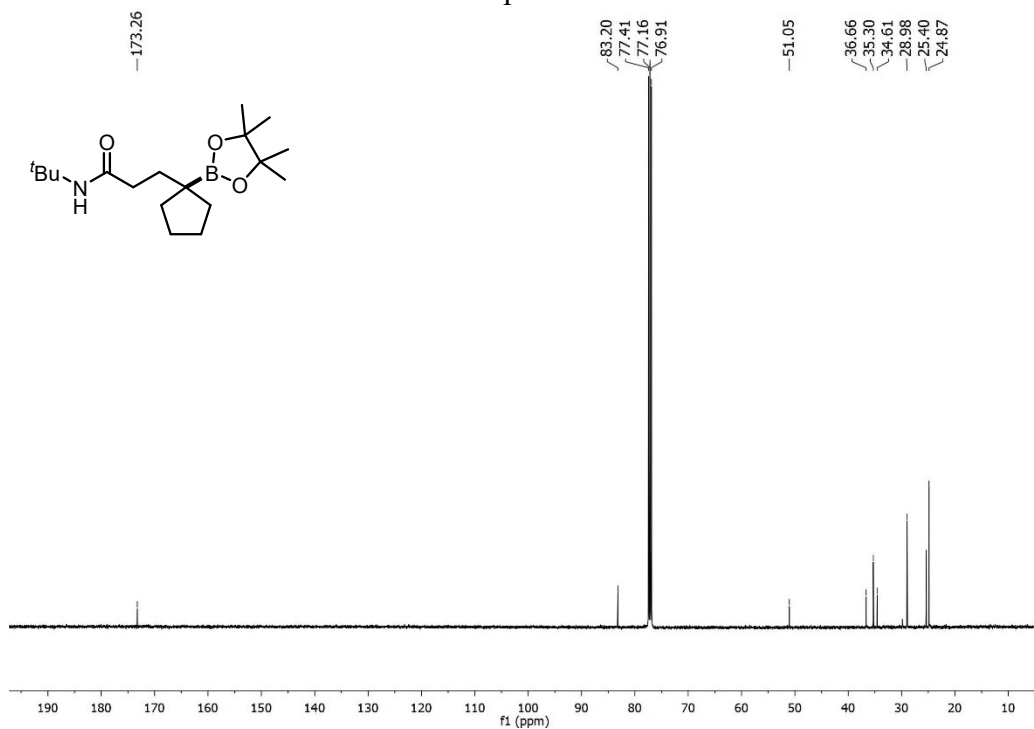

**<sup>13</sup>C NMR spectrum of 15**

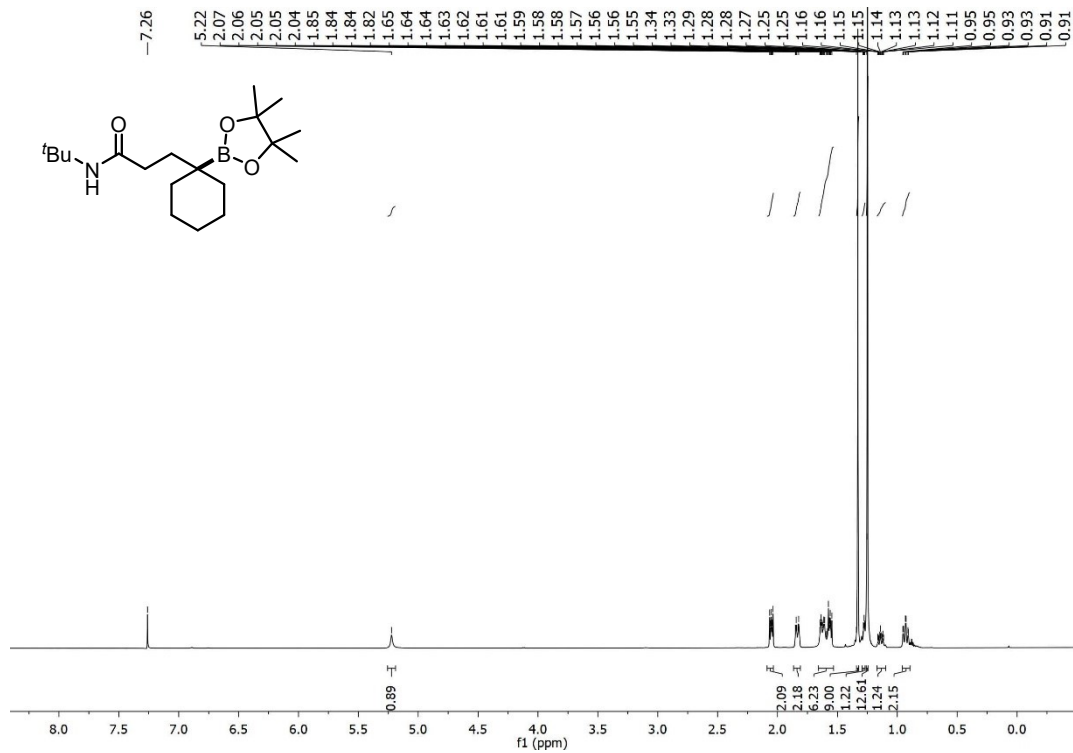

<sup>1</sup>H NMR spectrum of 16

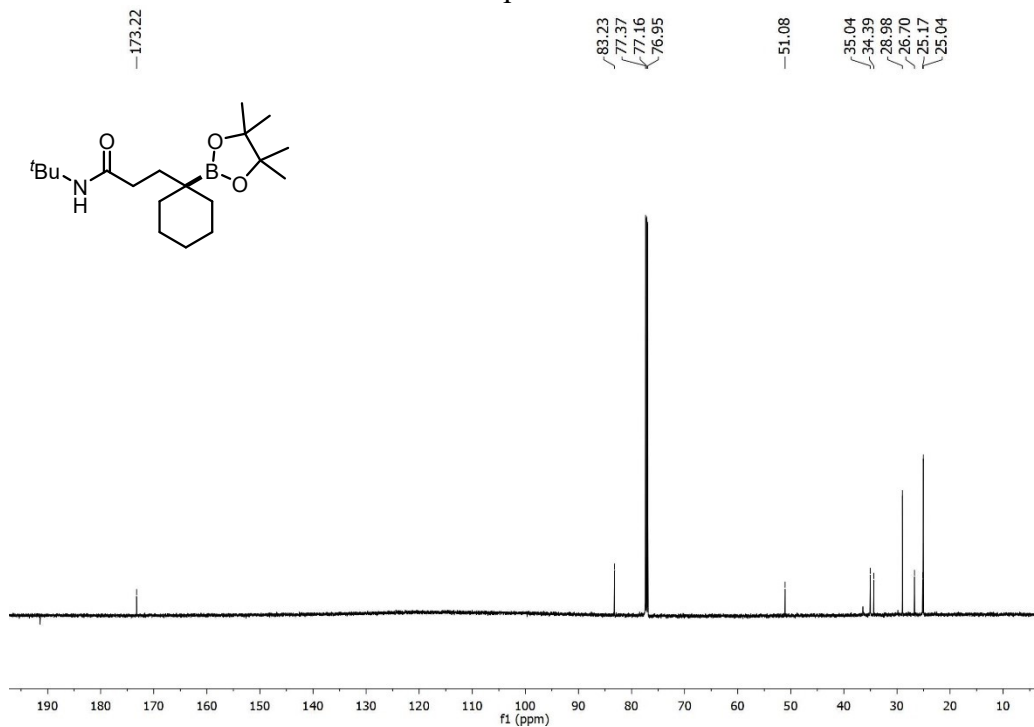

<sup>13</sup>C NMR spectrum of 16

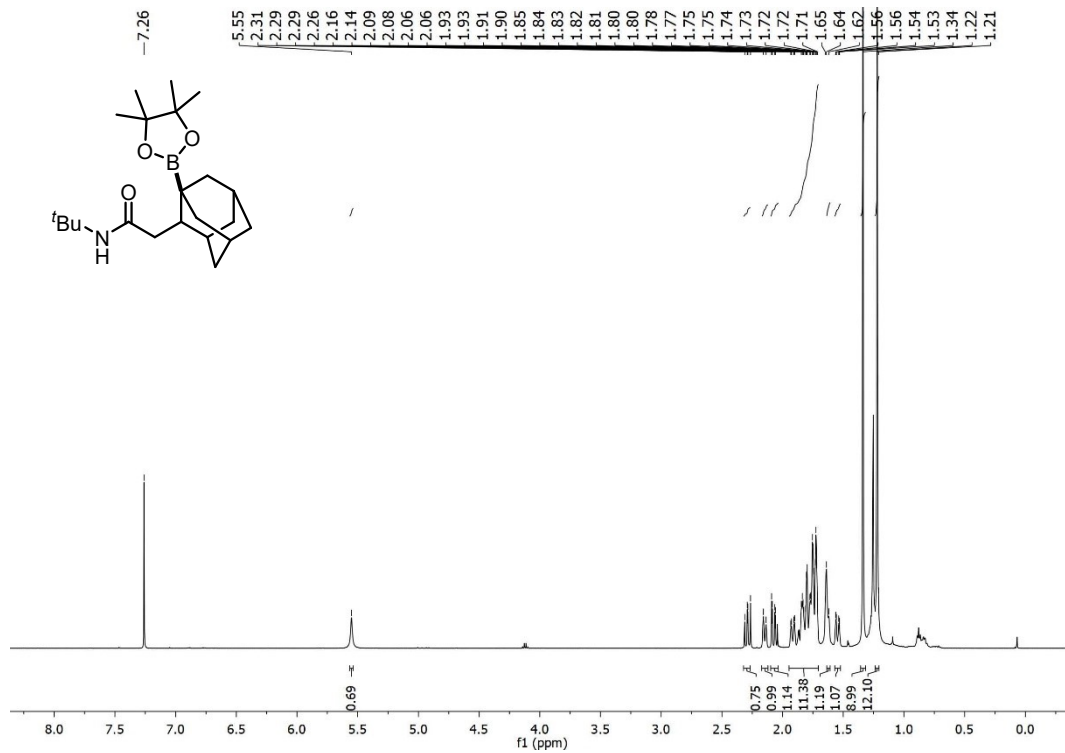

<sup>1</sup>H NMR spectrum of 17

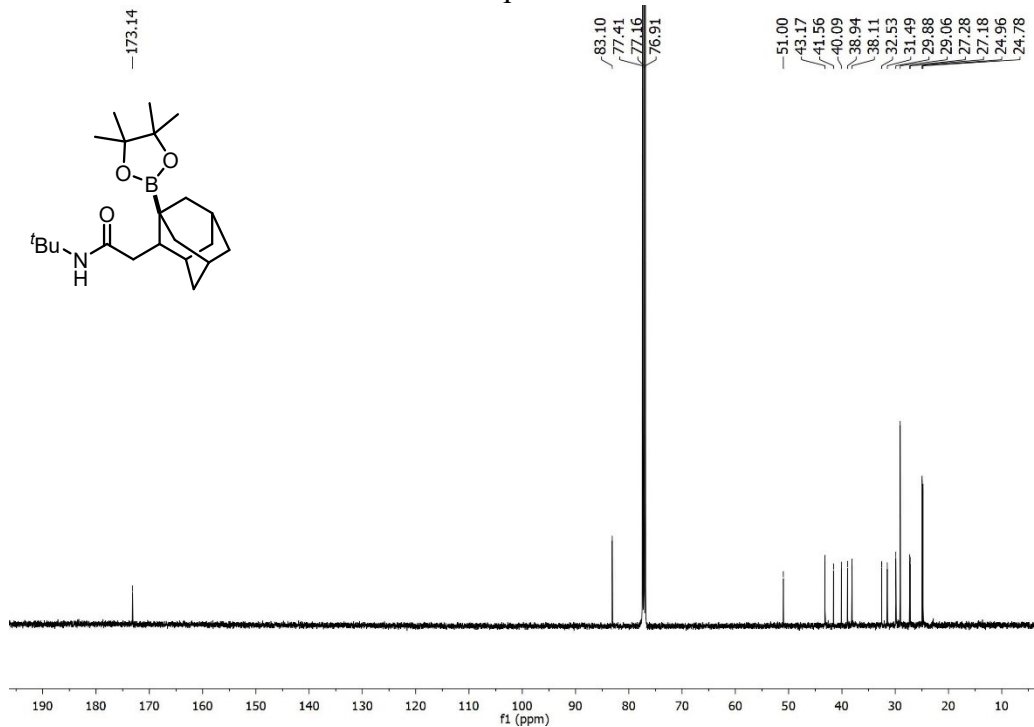

<sup>13</sup>C NMR spectrum of 17



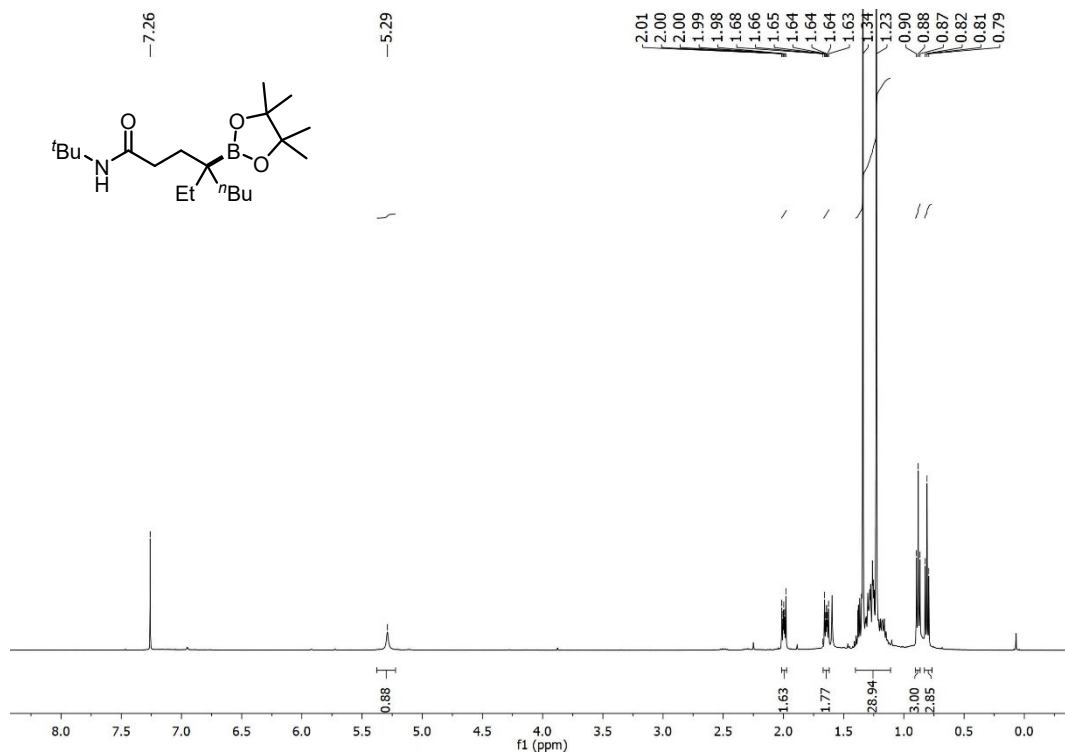

**<sup>1</sup>H NMR spectrum of 19**

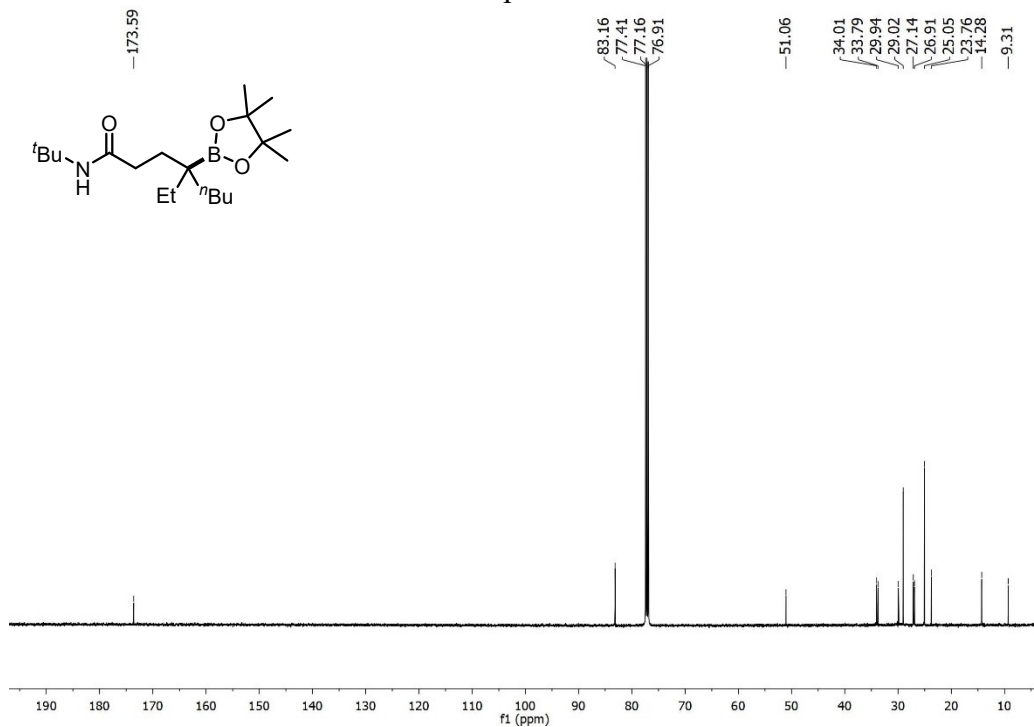

**<sup>13</sup>C NMR spectrum of 19**

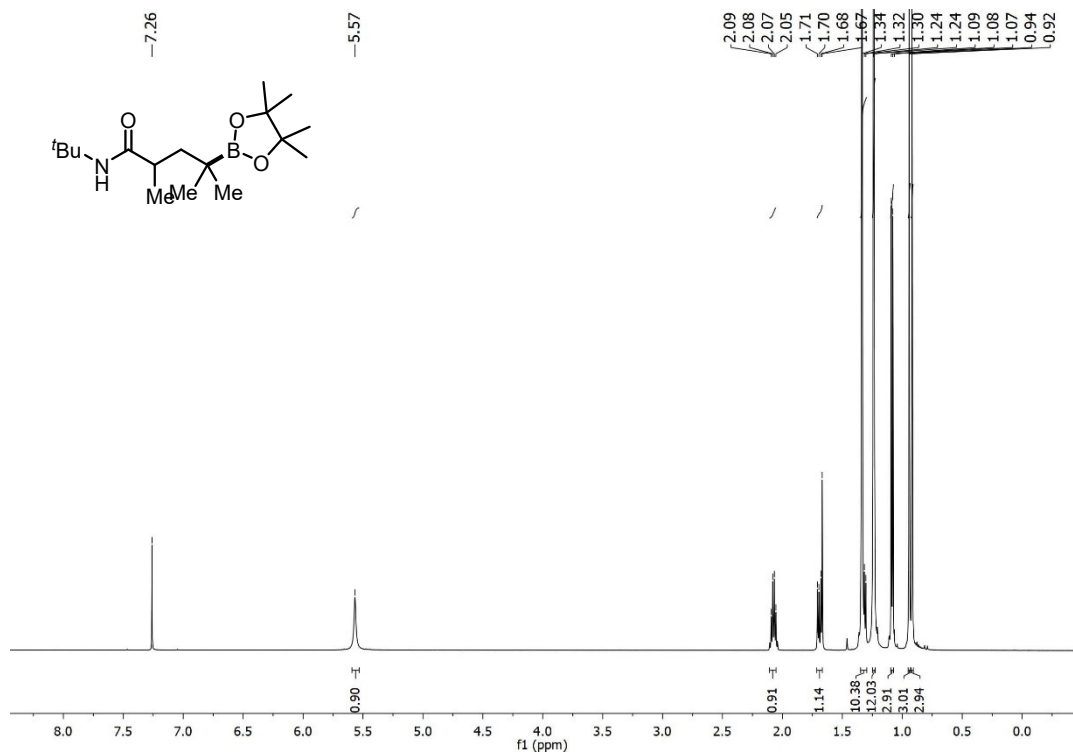

**<sup>1</sup>H NMR spectrum of 20**

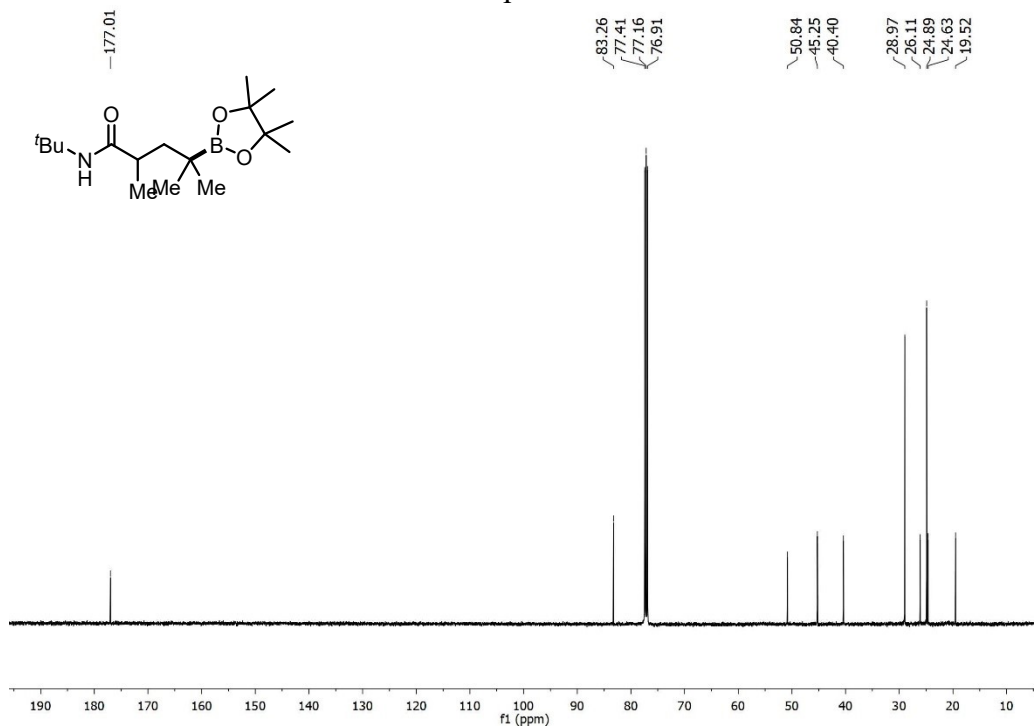

**<sup>13</sup>C NMR spectrum of 20**

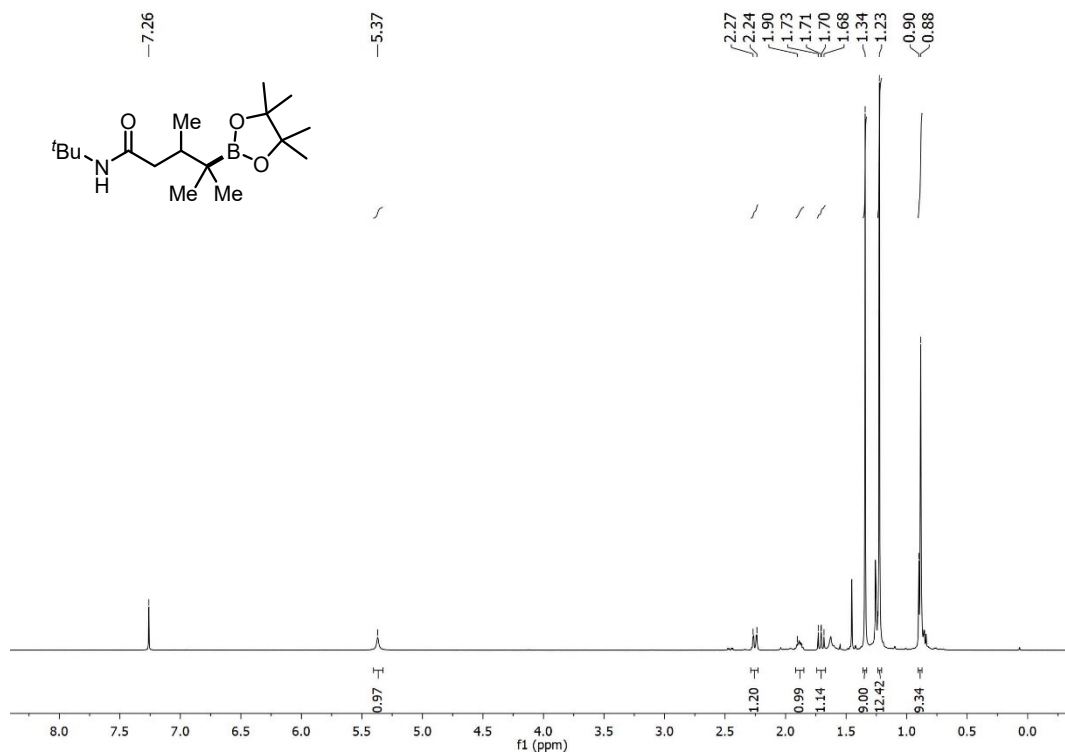

**<sup>1</sup>H NMR spectrum of 21**

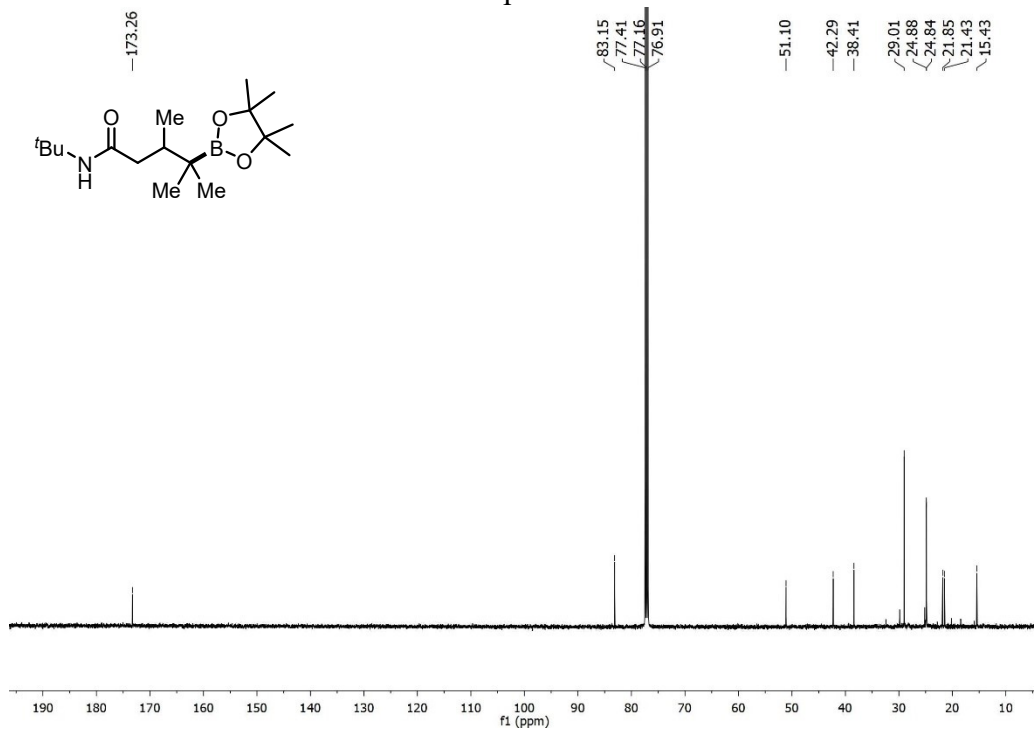

**<sup>13</sup>C NMR spectrum of 21**

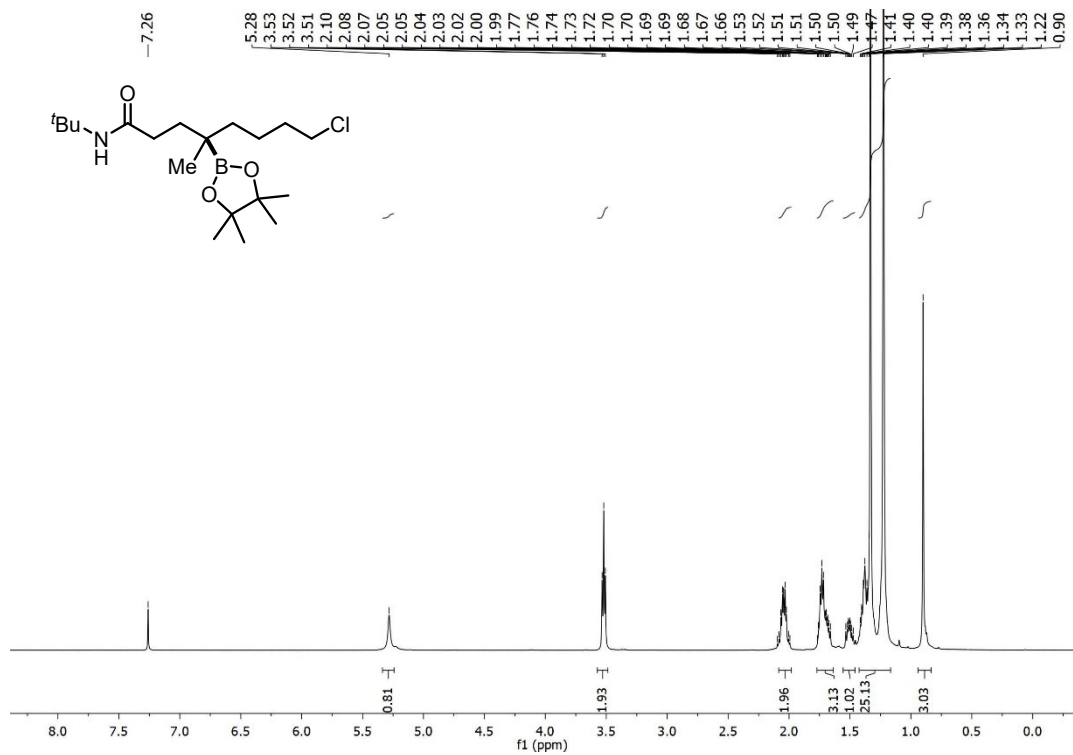

**<sup>1</sup>H NMR spectrum of 22**

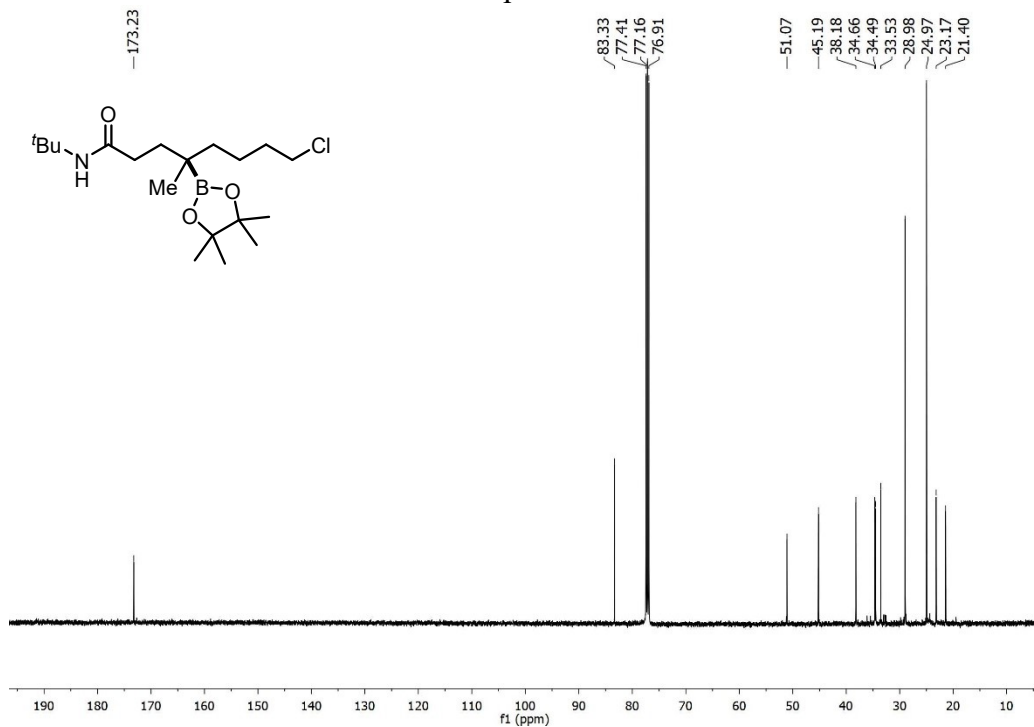

**<sup>13</sup>C NMR spectrum of 22**



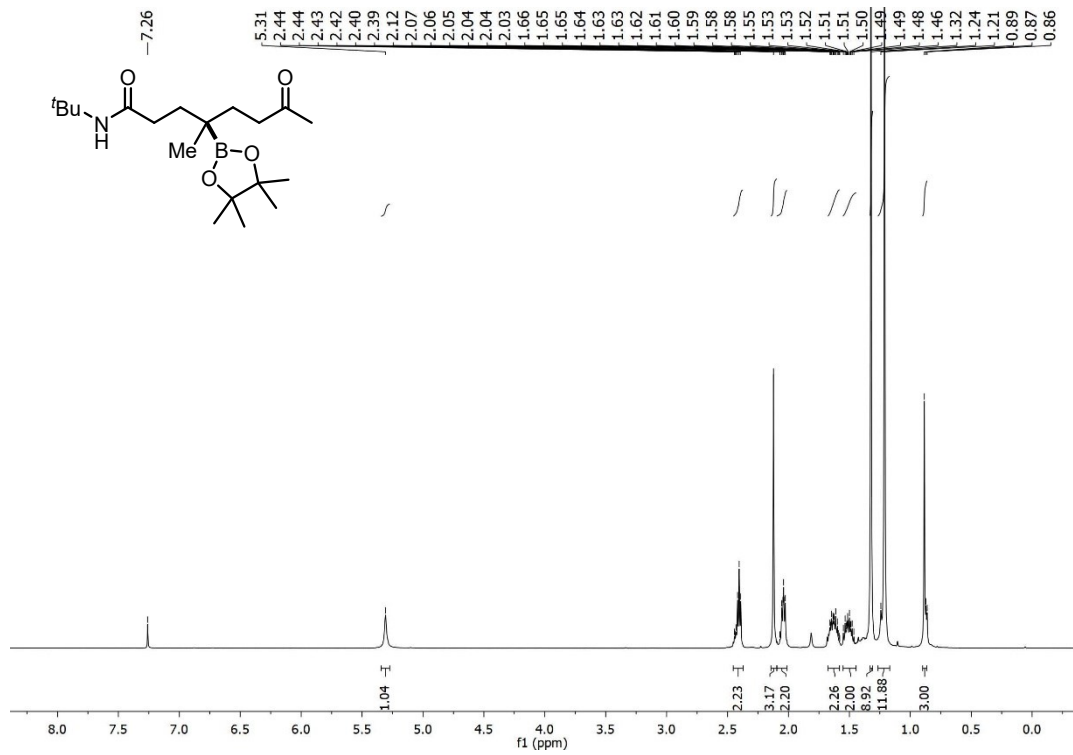

**<sup>1</sup>H NMR spectrum of 23**

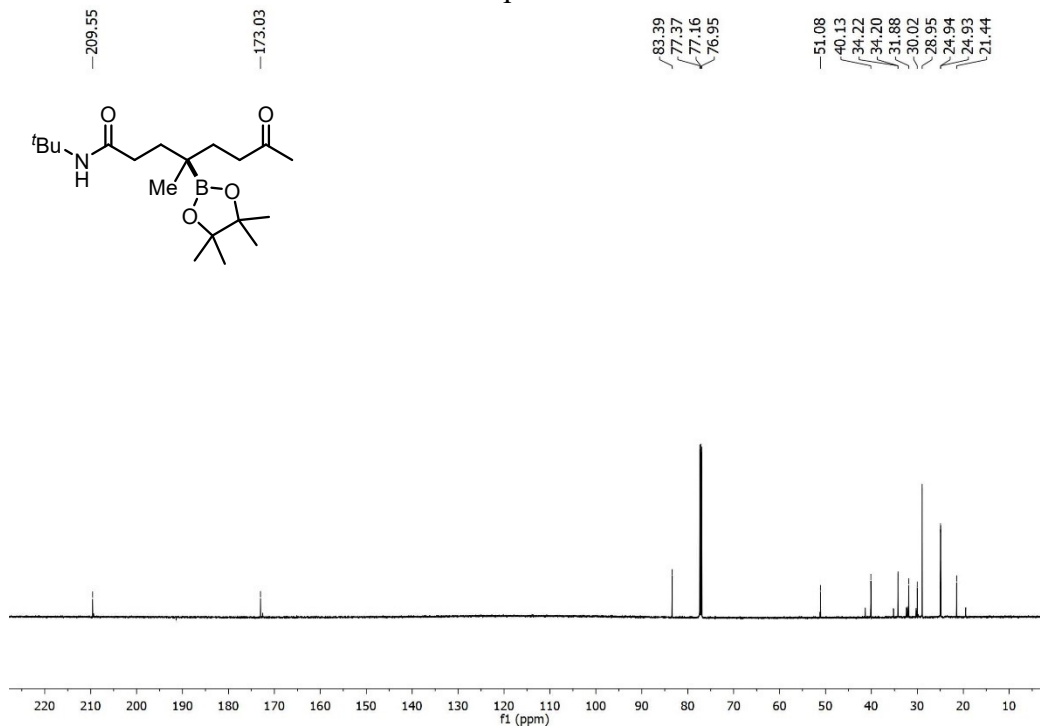

**<sup>13</sup>C NMR spectrum of 23**

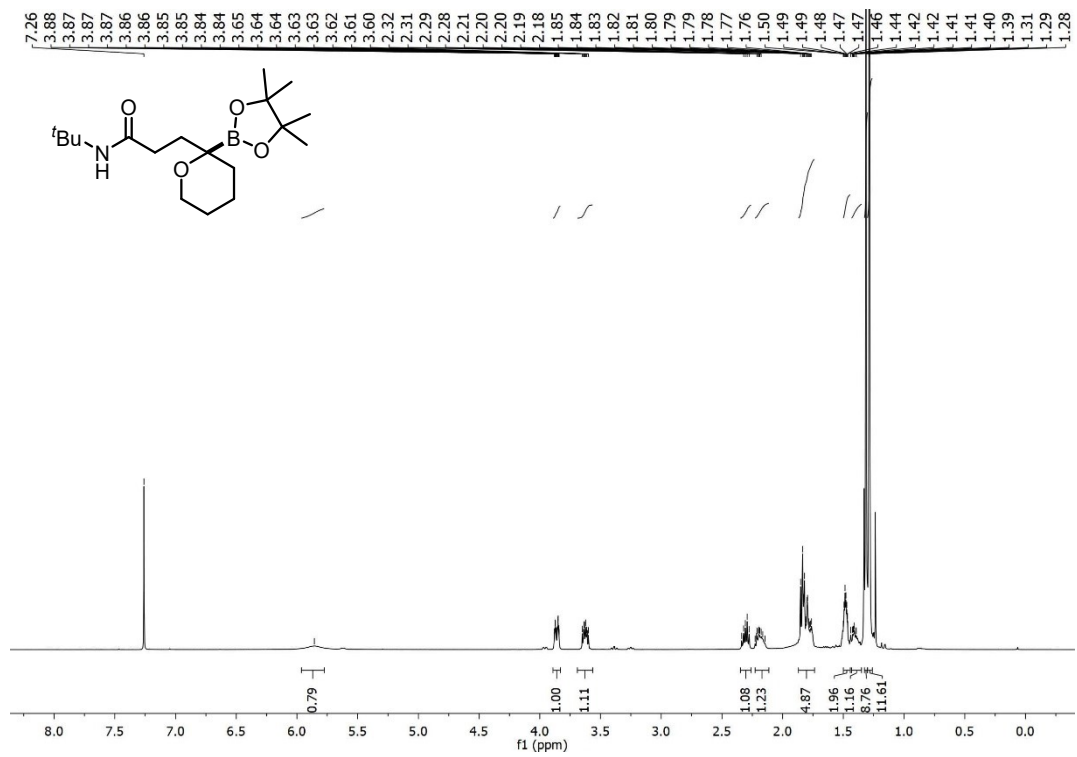

<sup>1</sup>H NMR spectrum of **24**

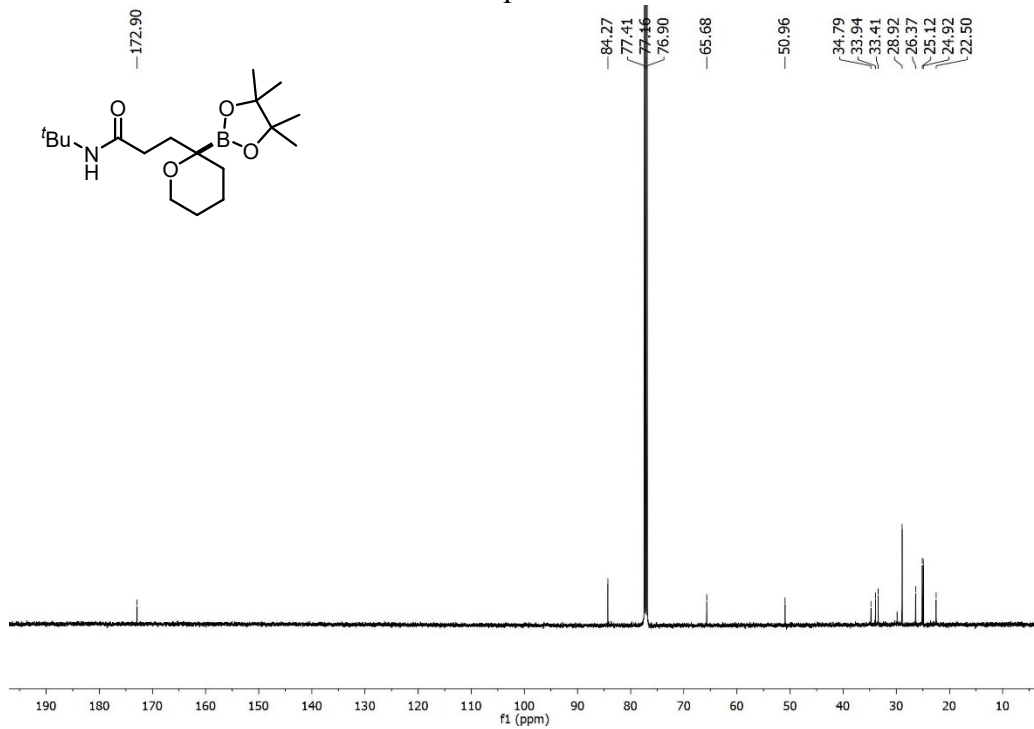

<sup>13</sup>C NMR spectrum of **24**

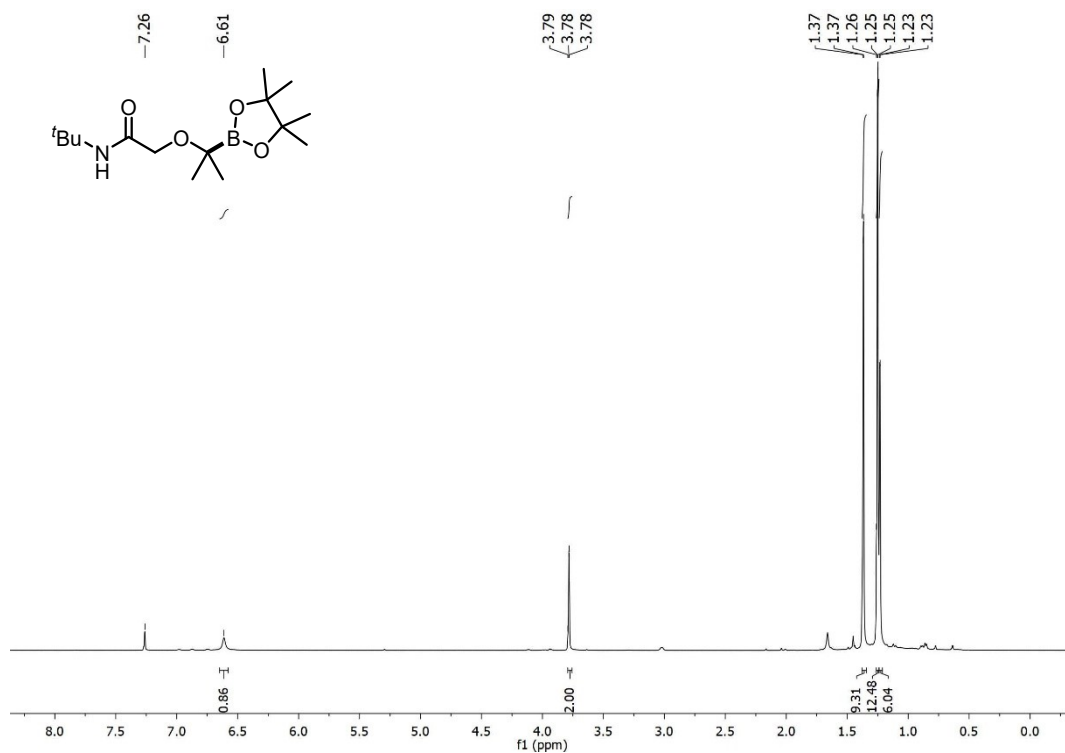

$^1\text{H}$  NMR spectrum of **25**

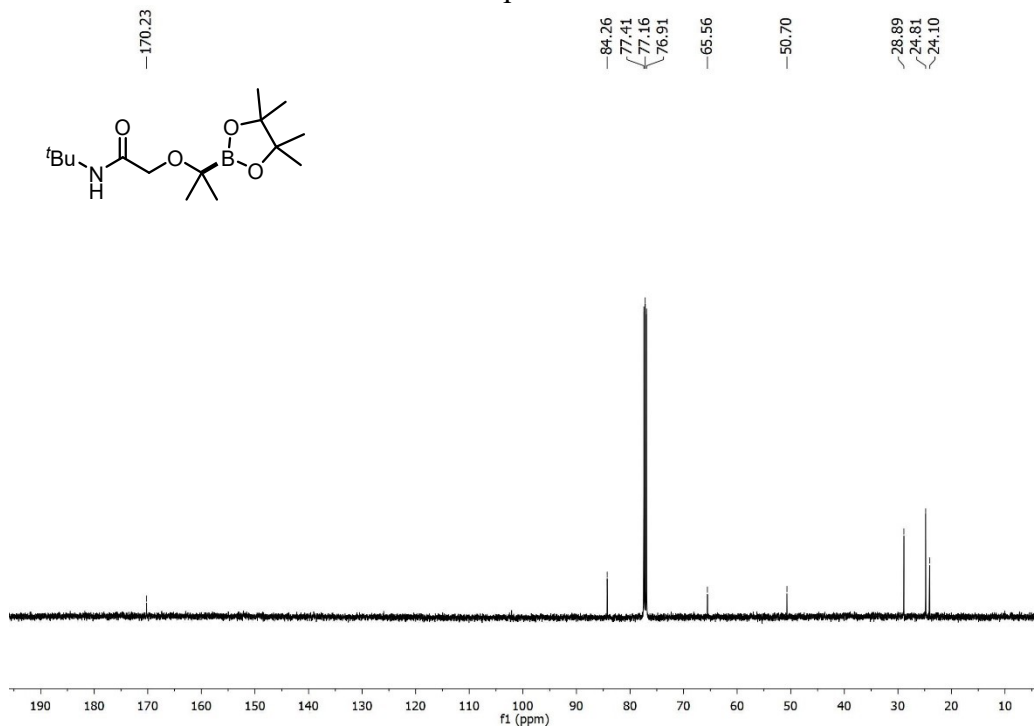

$^{13}\text{C}$  NMR spectrum of **25**



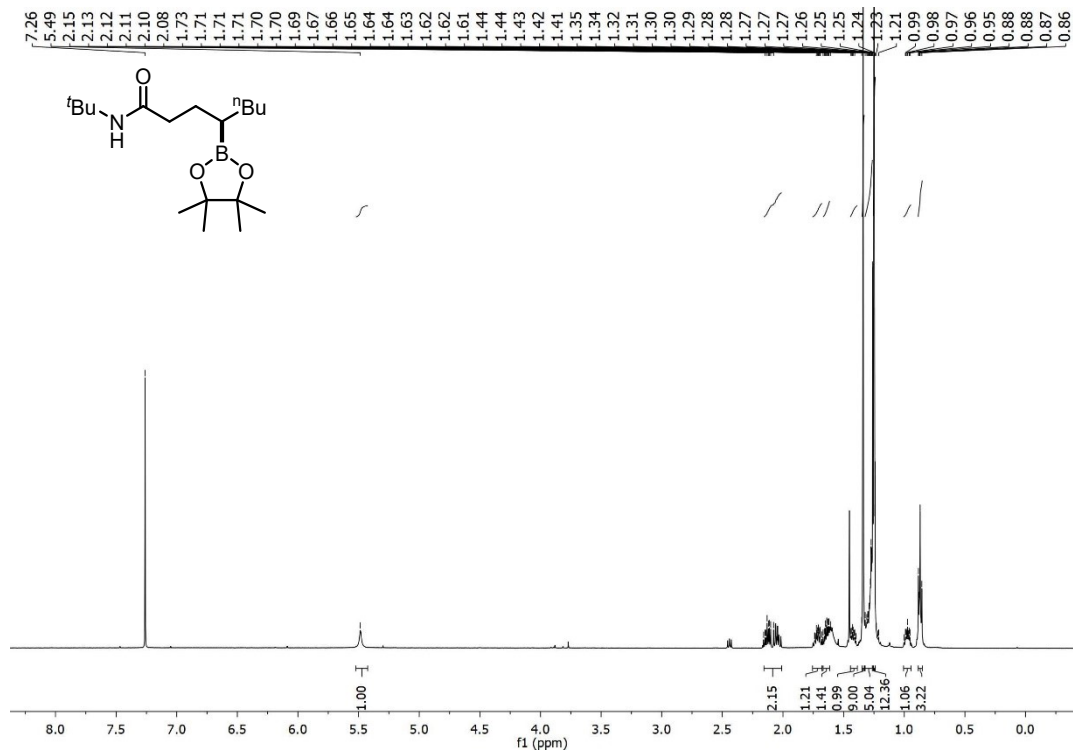

<sup>1</sup>H NMR spectrum of **27**

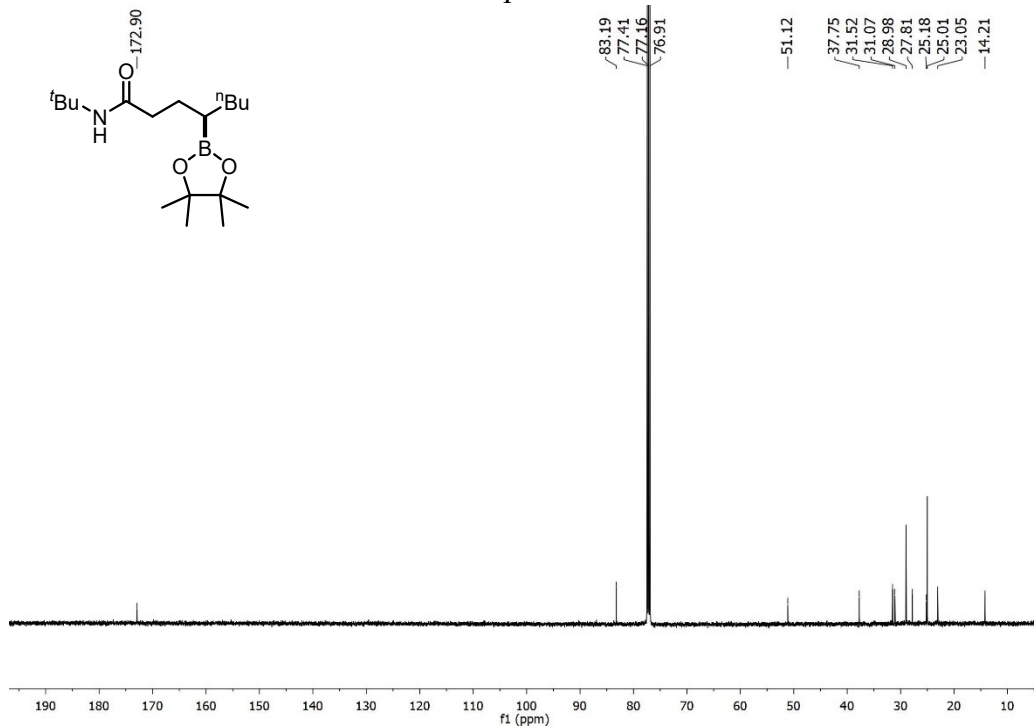

<sup>13</sup>C NMR spectrum of **27**

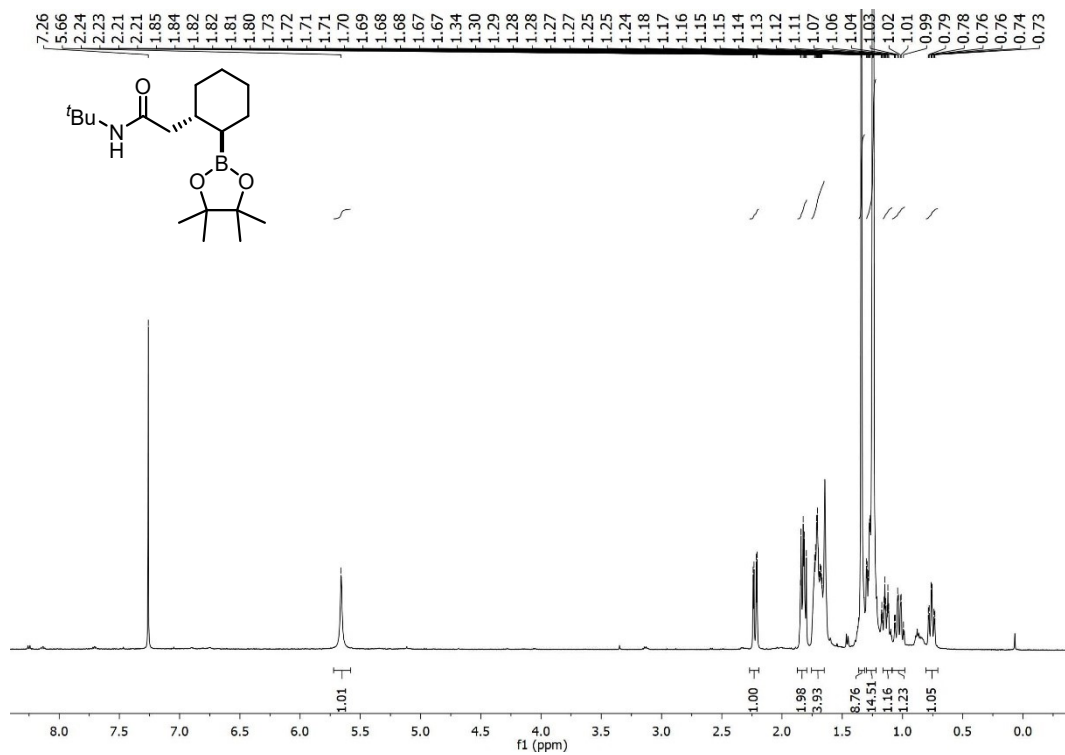

**<sup>1</sup>H NMR spectrum of 28**

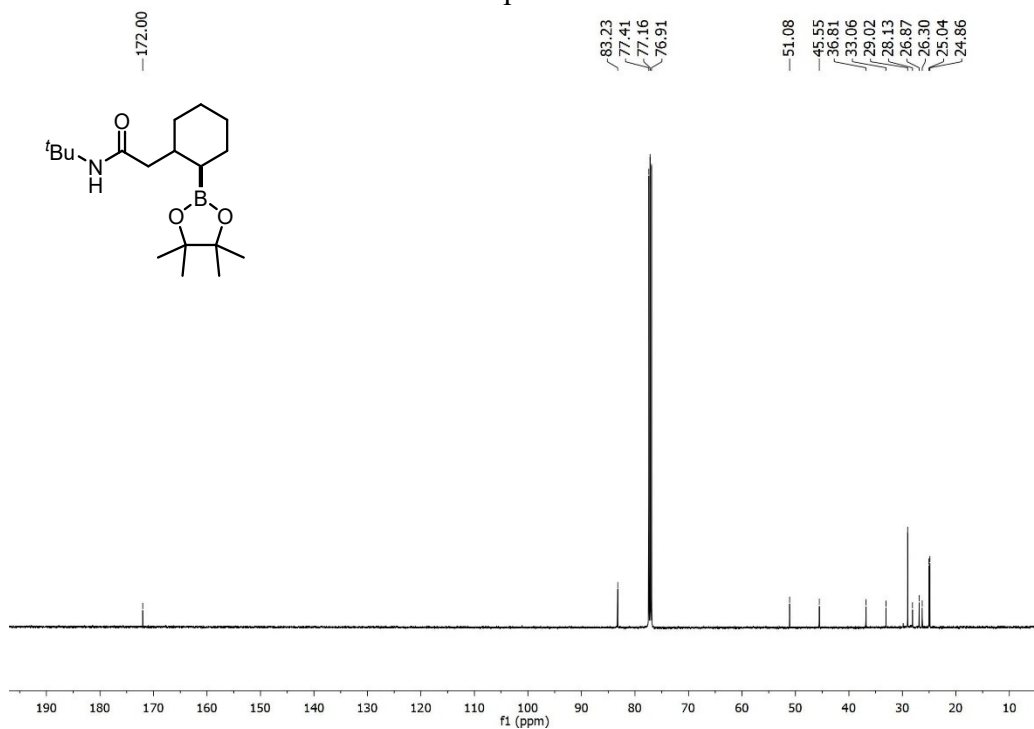

**<sup>13</sup>C NMR spectrum of 28**

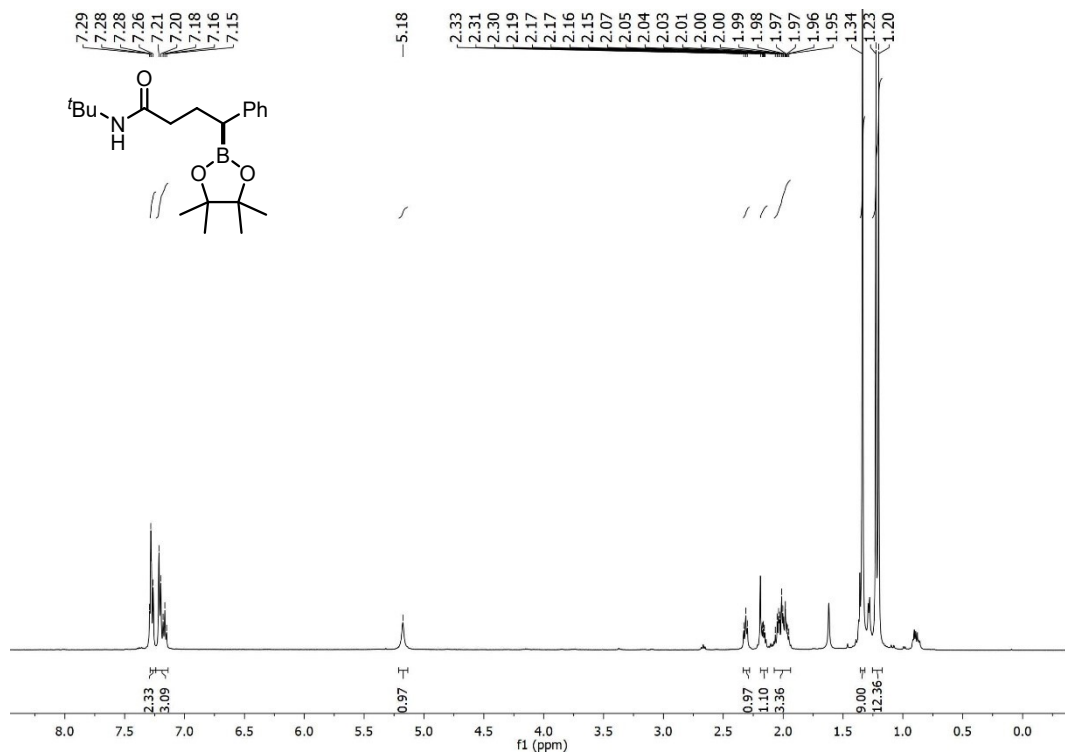

<sup>1</sup>H NMR spectrum of **29**

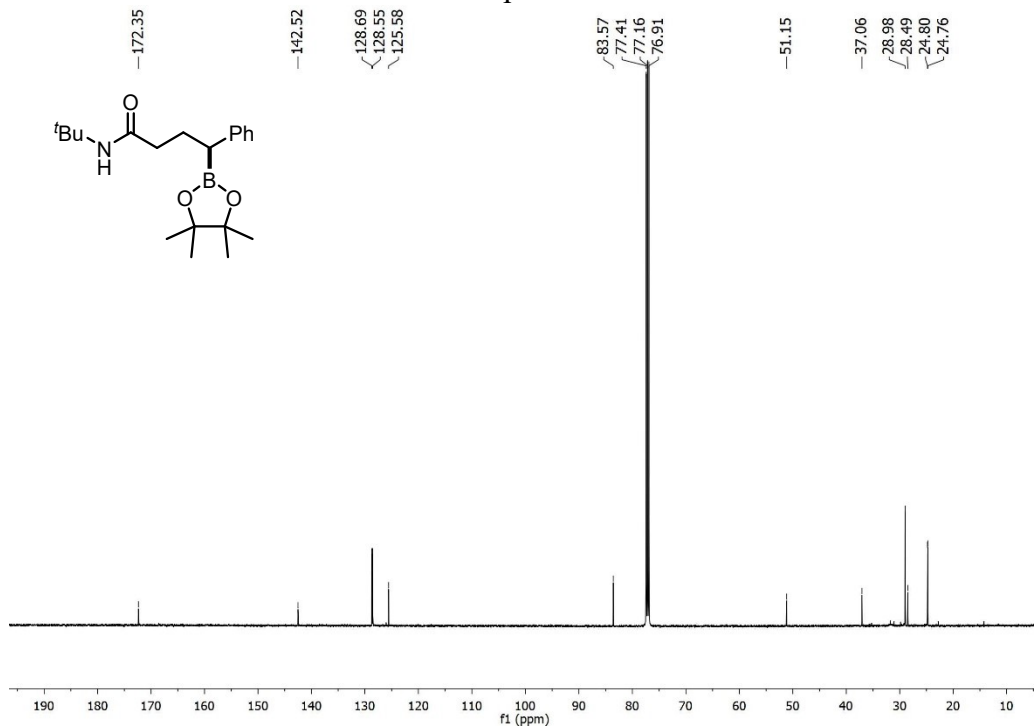

<sup>13</sup>C NMR spectrum of **29**

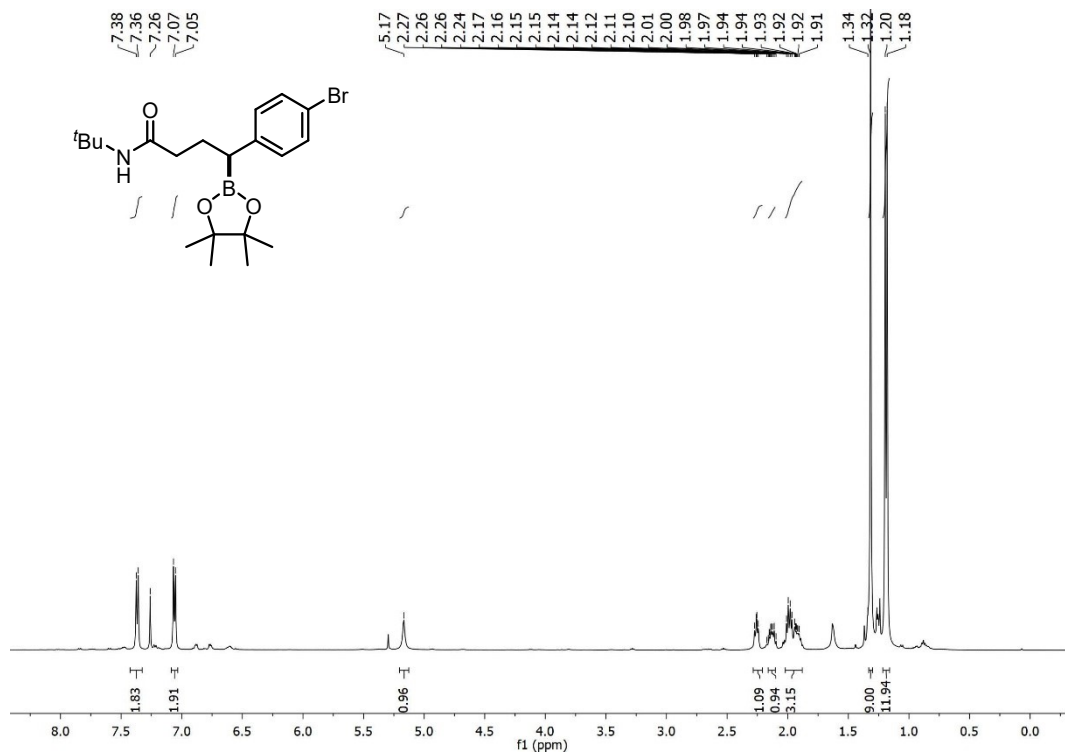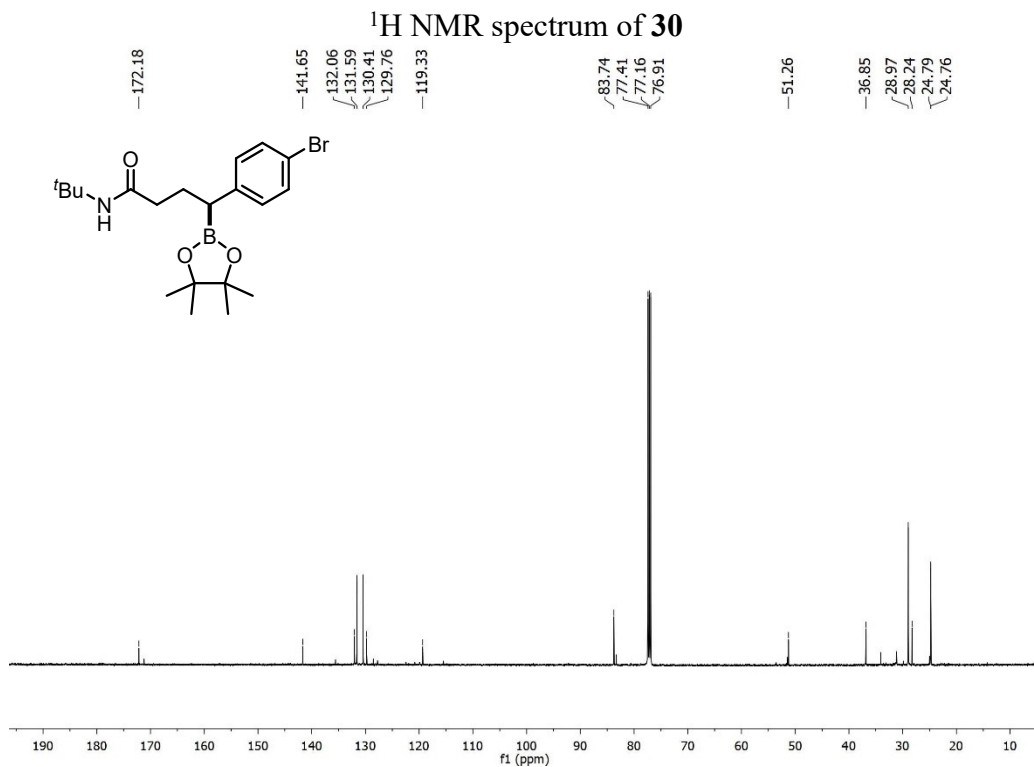

**<sup>13</sup>C NMR spectrum of 30**



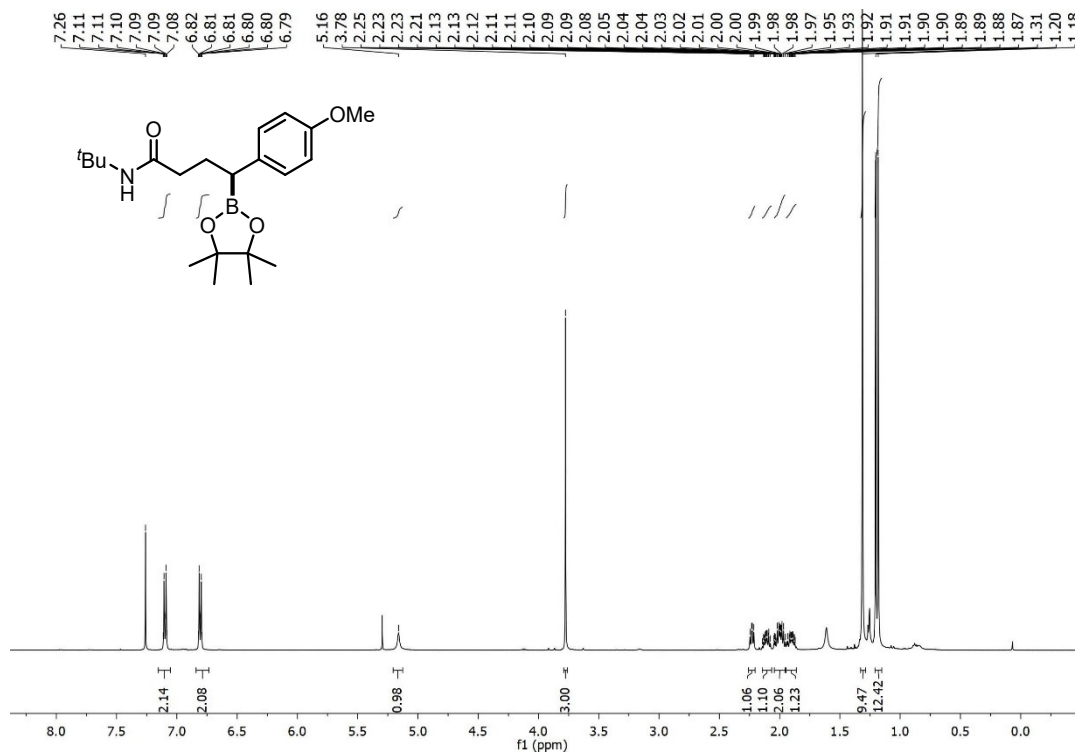

**<sup>1</sup>H NMR spectrum of 31**

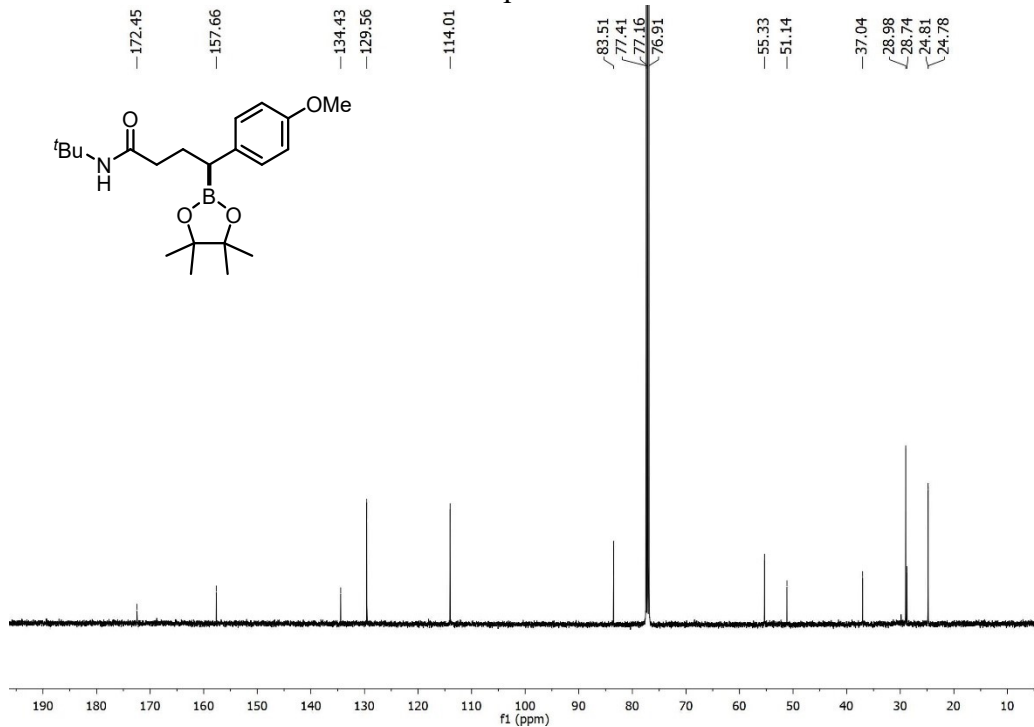

**<sup>13</sup>C NMR spectrum of 31**

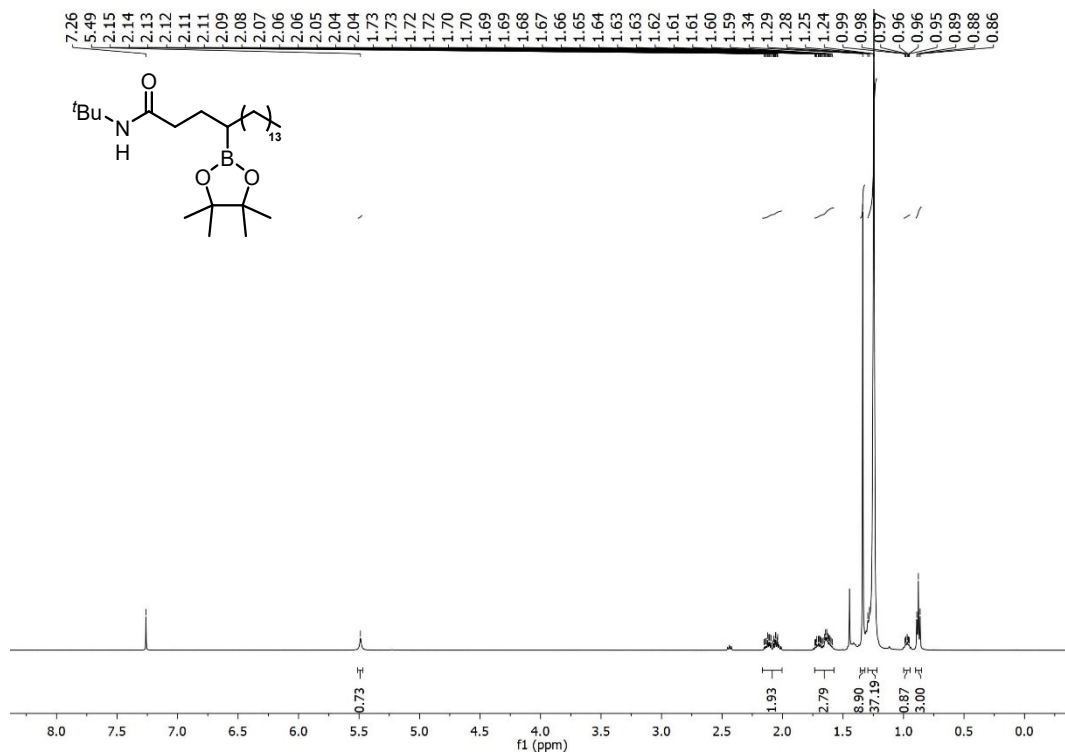

**<sup>1</sup>H NMR spectrum of **32****

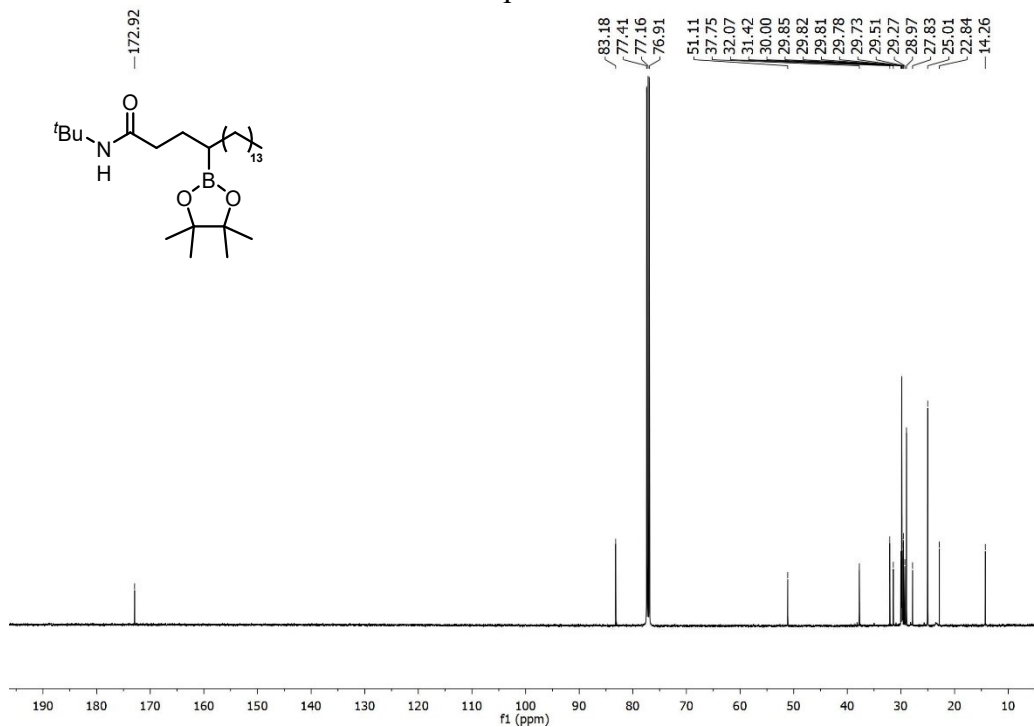

**<sup>13</sup>C NMR spectrum of **32****

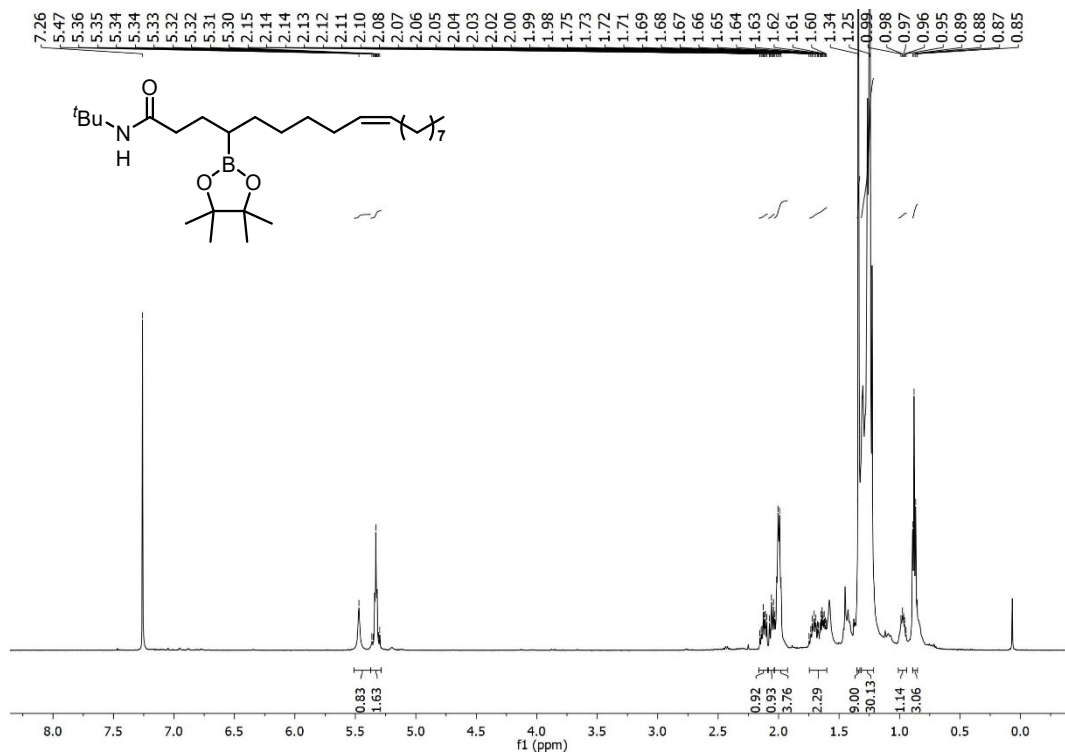

<sup>1</sup>H NMR spectrum of **33**

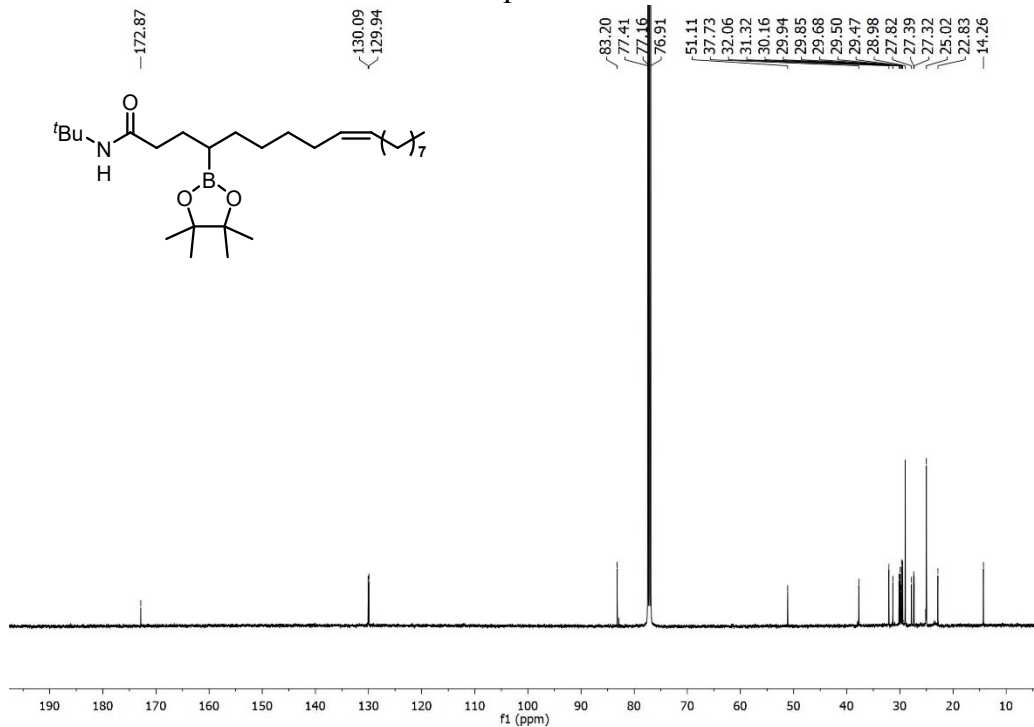

<sup>13</sup>C NMR spectrum of **33**

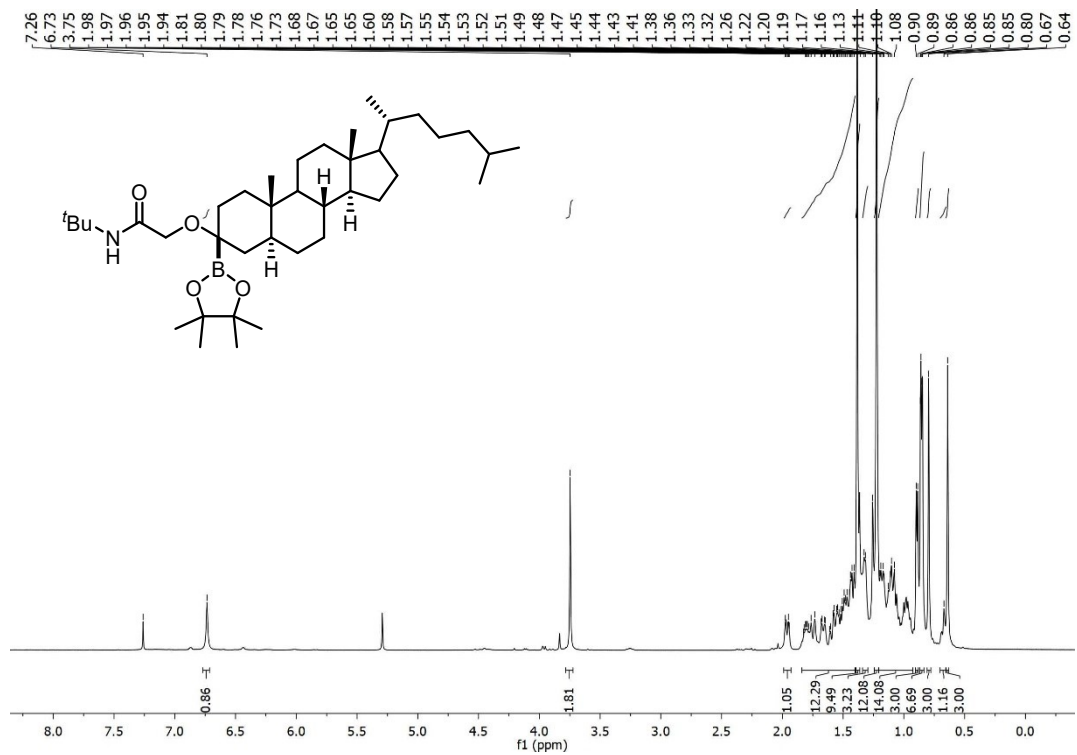

<sup>1</sup>H NMR spectrum of **34**

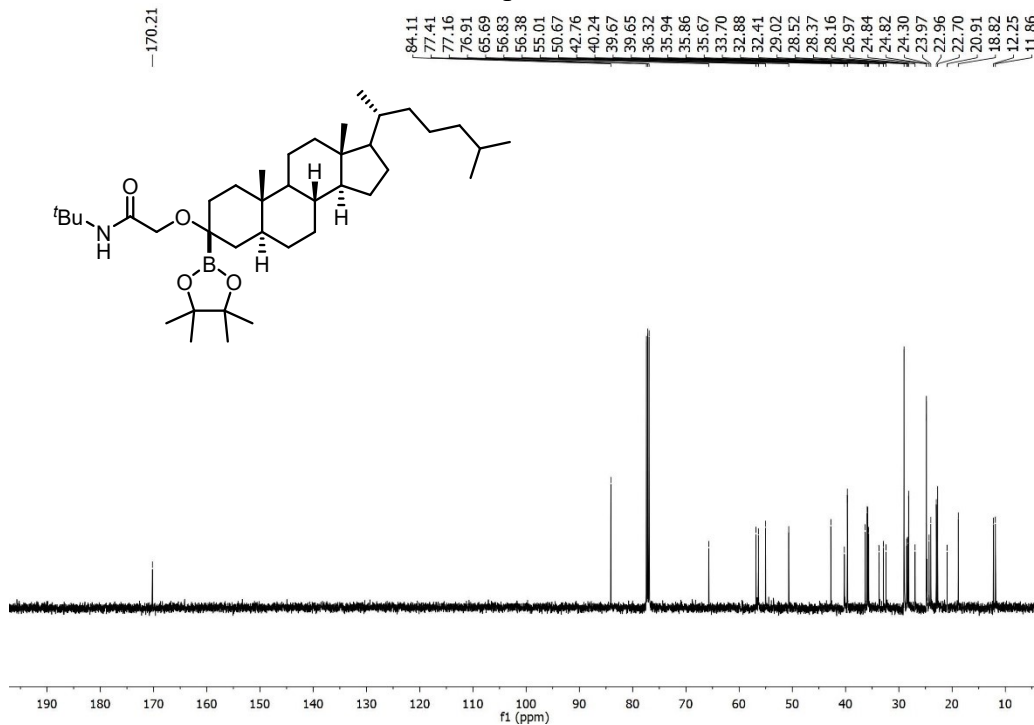

<sup>13</sup>C NMR spectrum of **34**

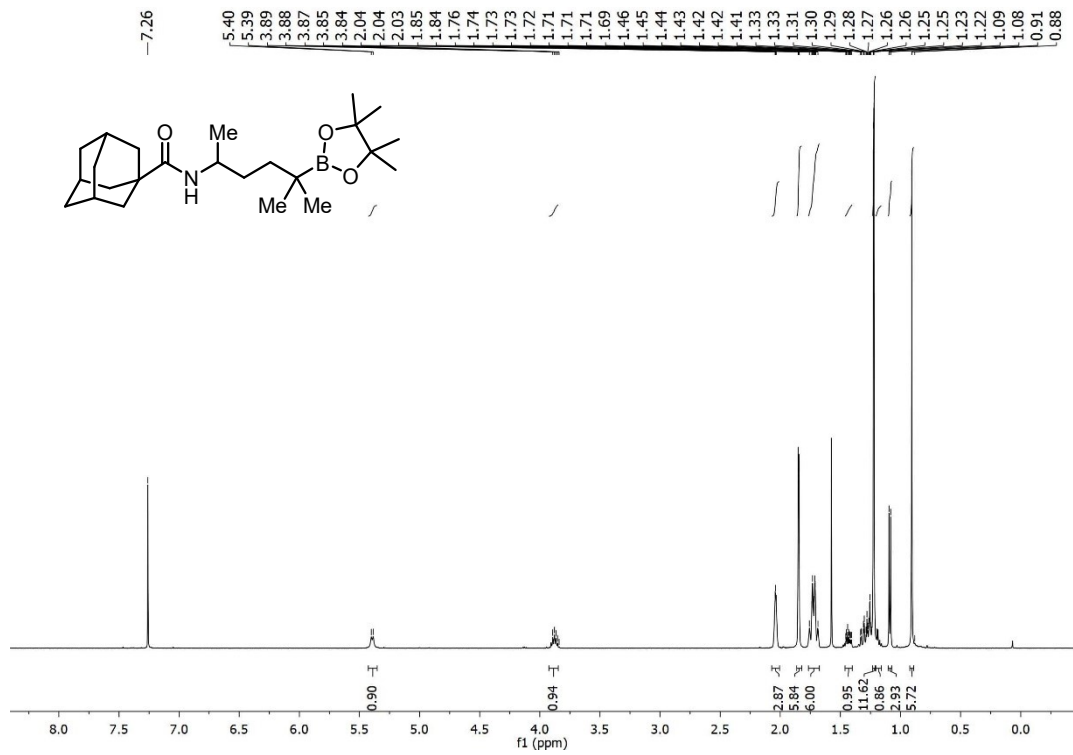

**<sup>1</sup>H NMR spectrum of 36**

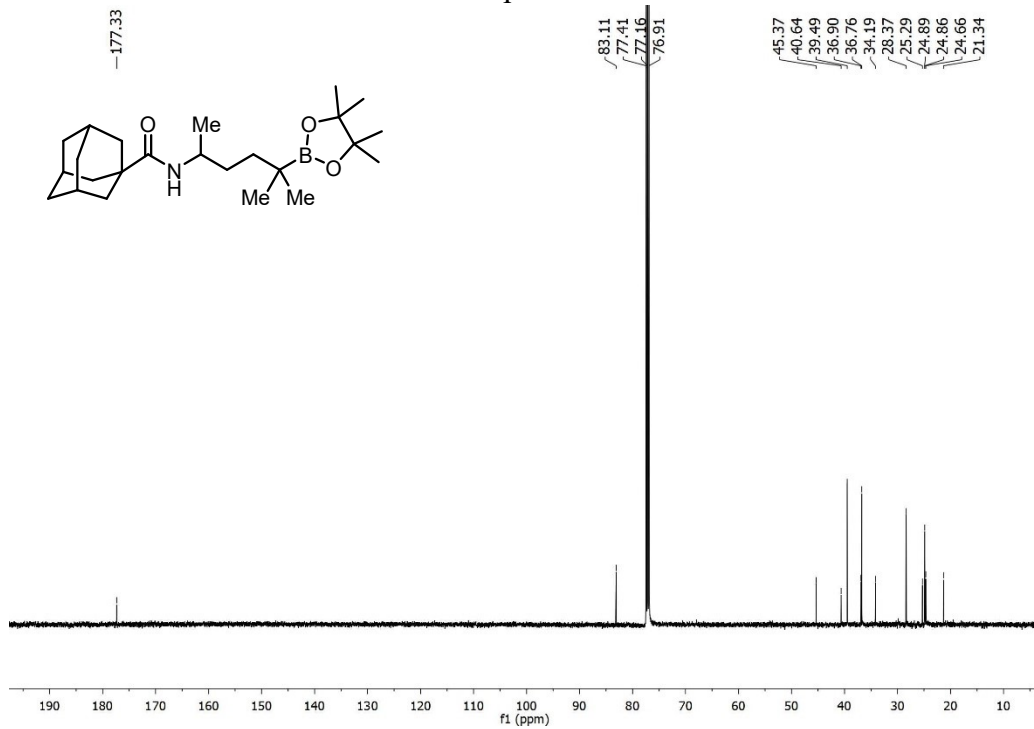

**<sup>13</sup>C NMR spectrum of 36**

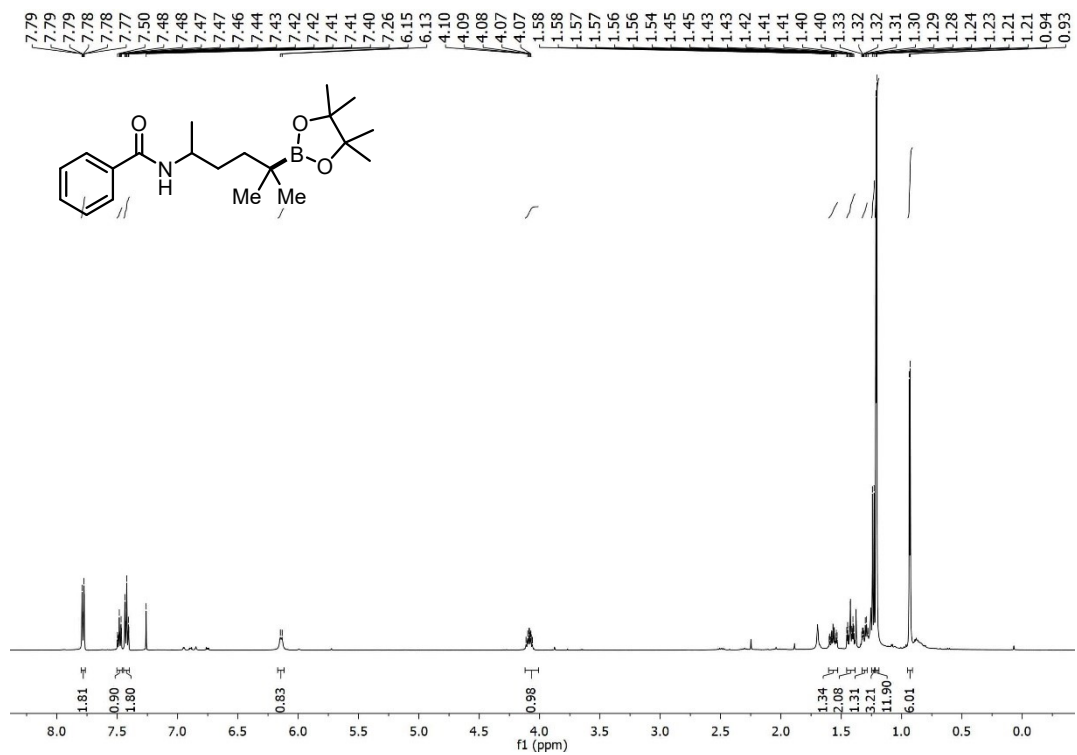

**<sup>1</sup>H NMR spectrum of 37**

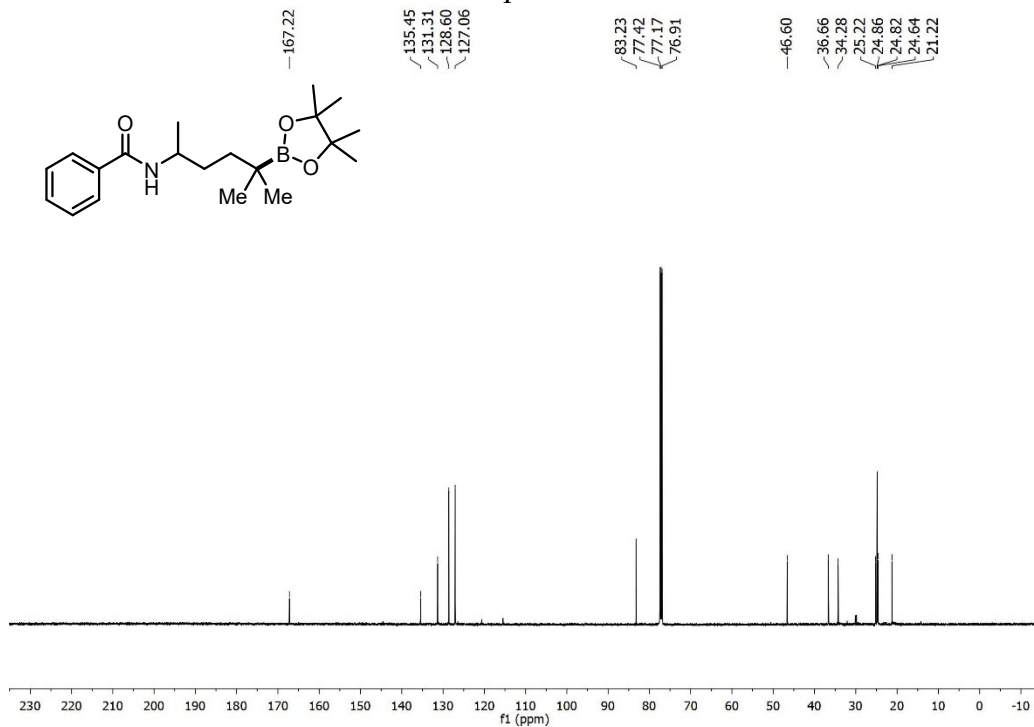

**<sup>13</sup>C NMR spectrum of 37**

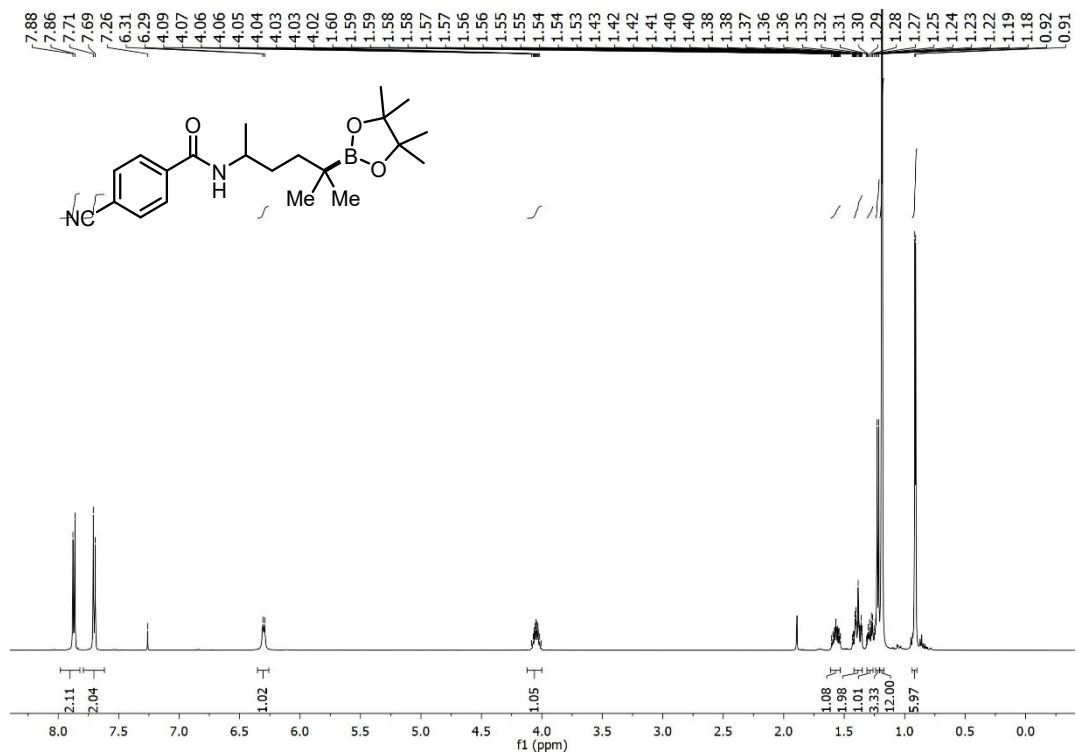

<sup>1</sup>H NMR spectrum of **38**

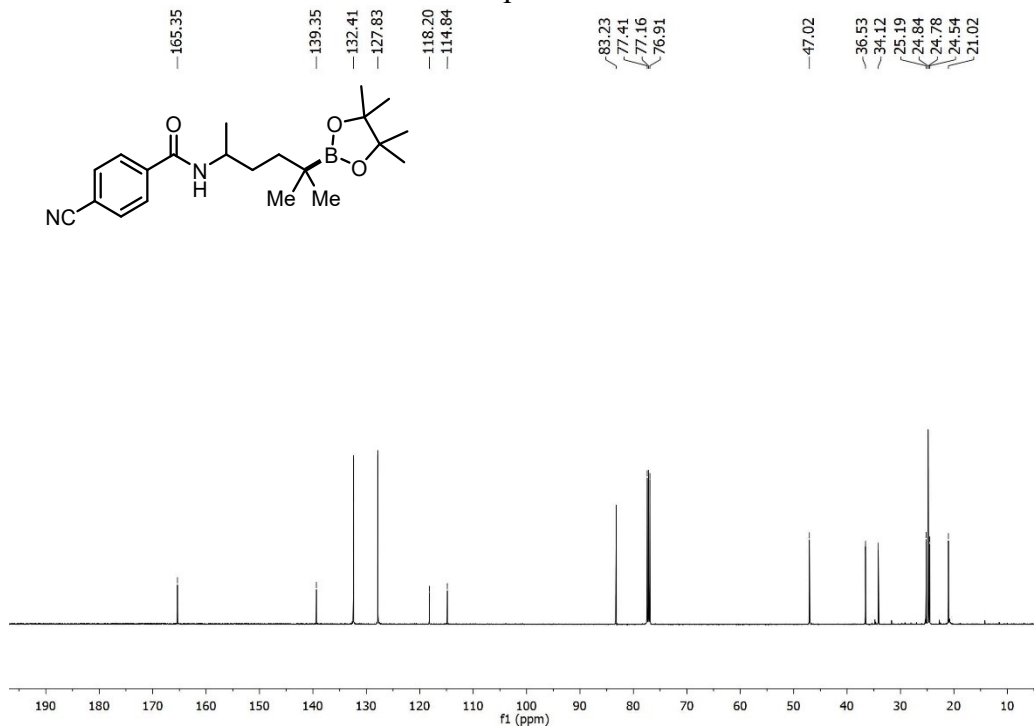

<sup>13</sup>C NMR spectrum of **38**

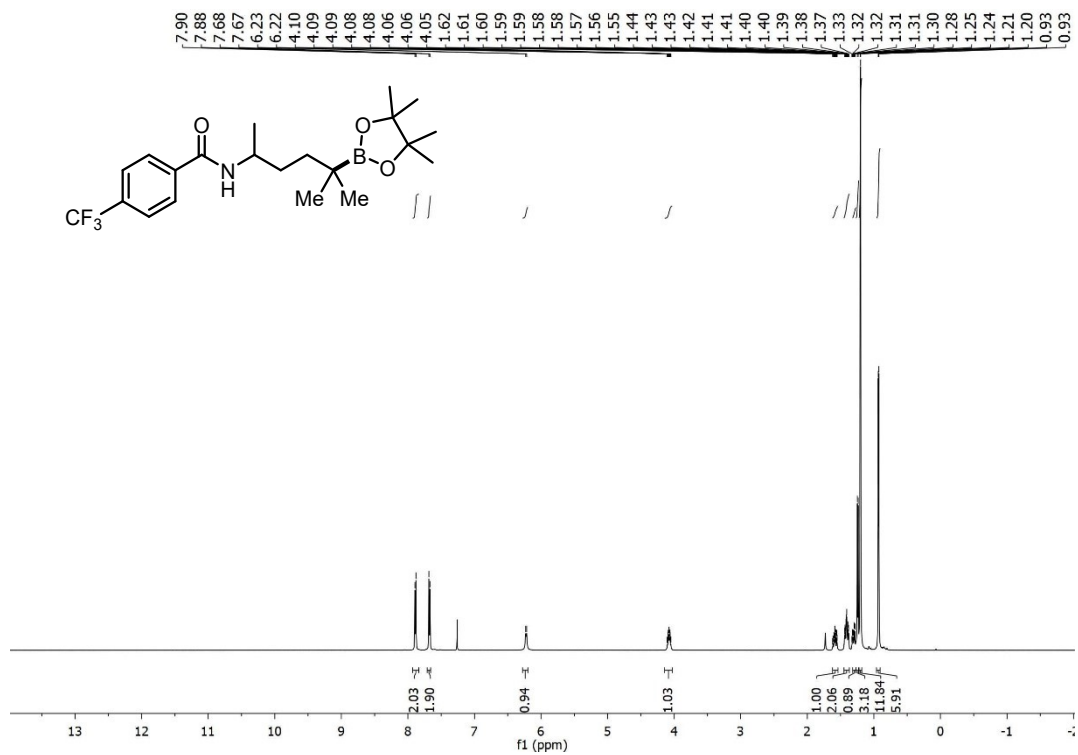

<sup>1</sup>H NMR spectrum of **39**

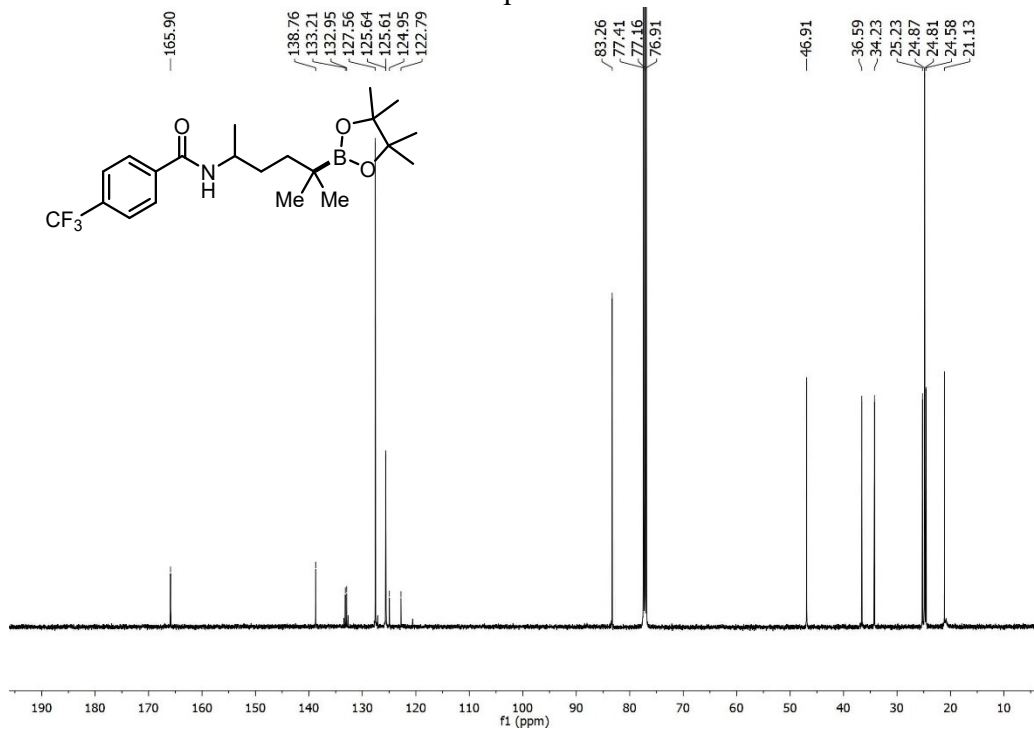

<sup>13</sup>C NMR spectrum of **39**



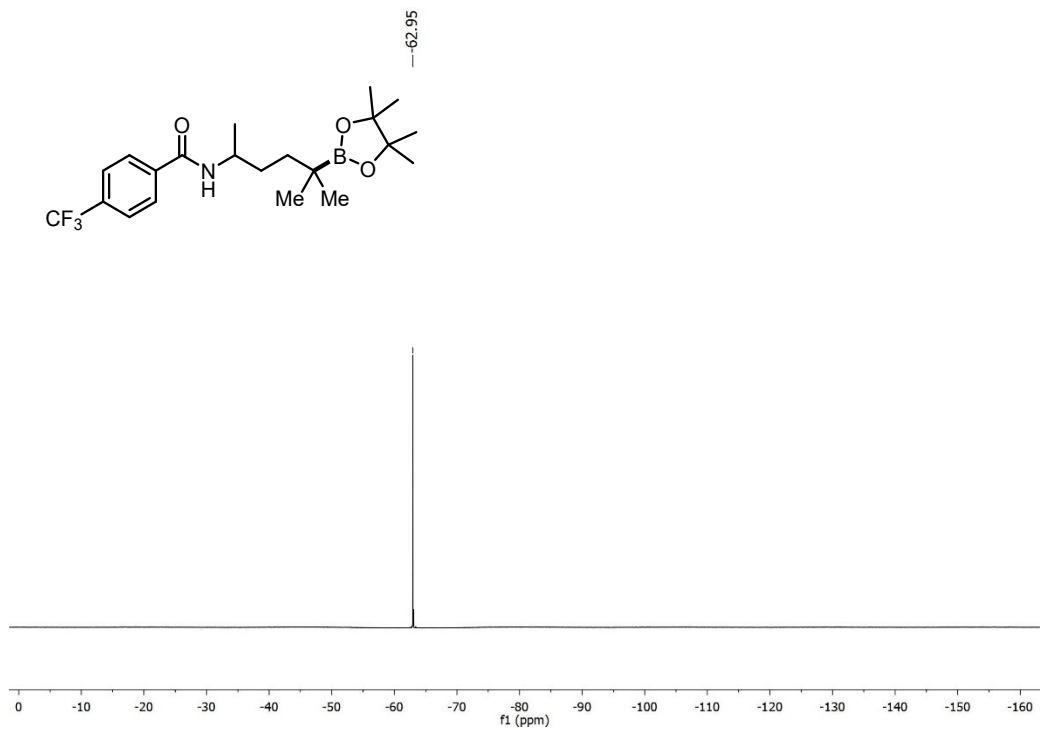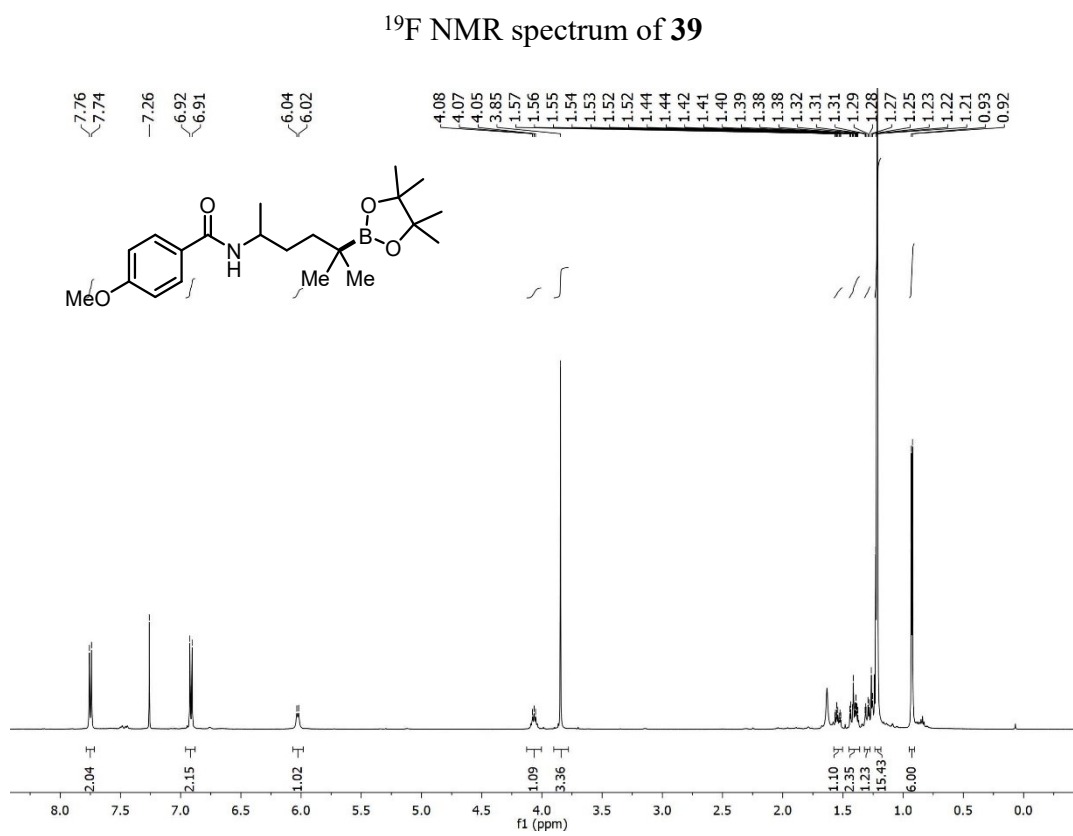

**<sup>1</sup>H NMR spectrum of 40**

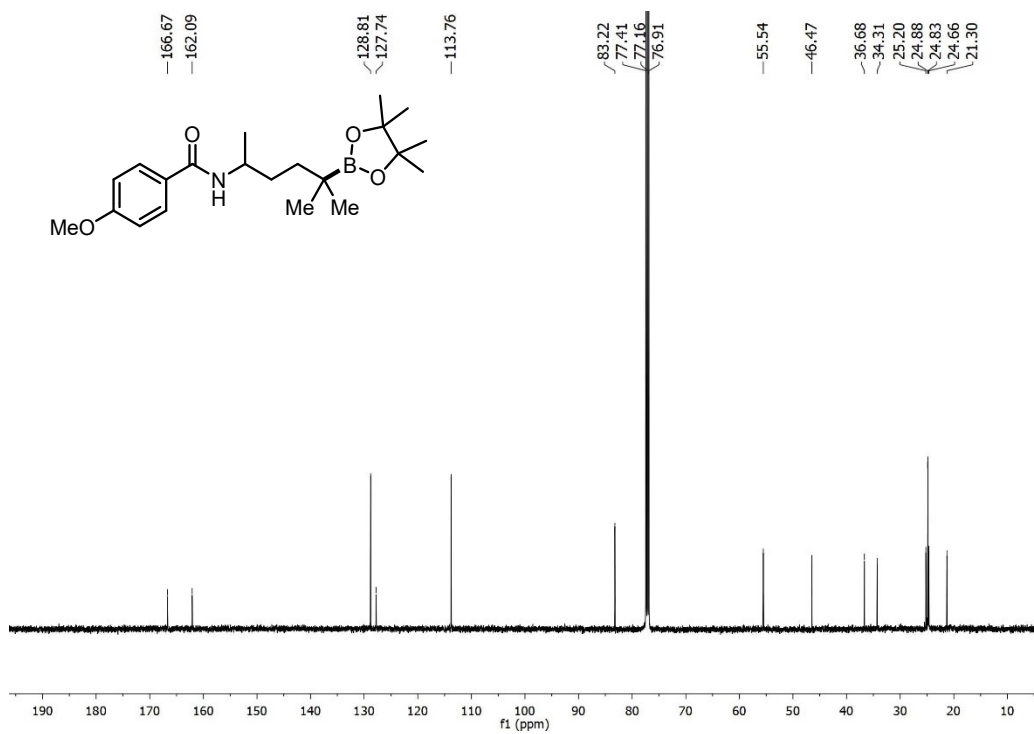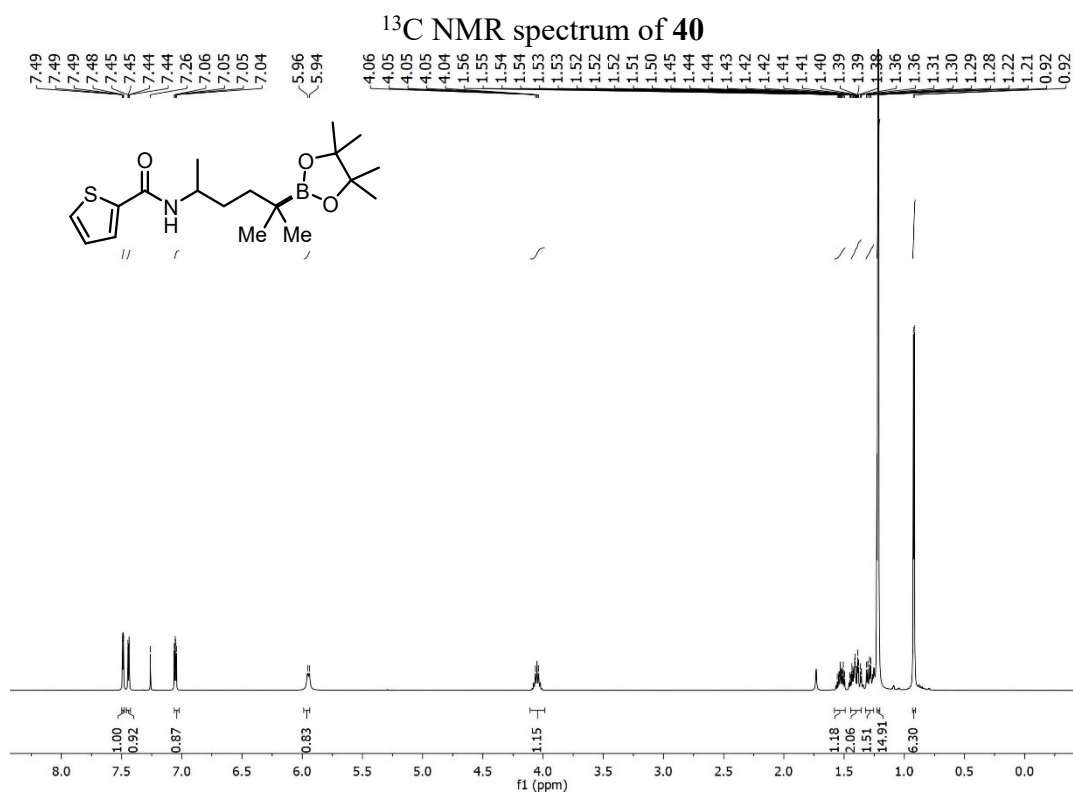

<sup>1</sup>H NMR spectrum of **41**

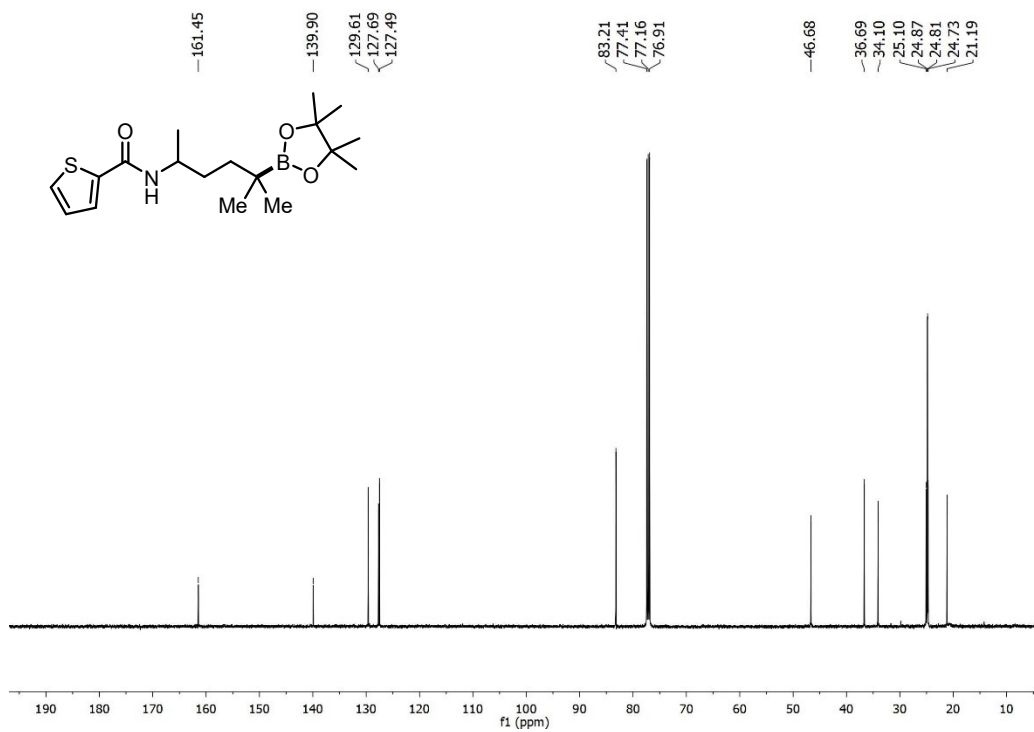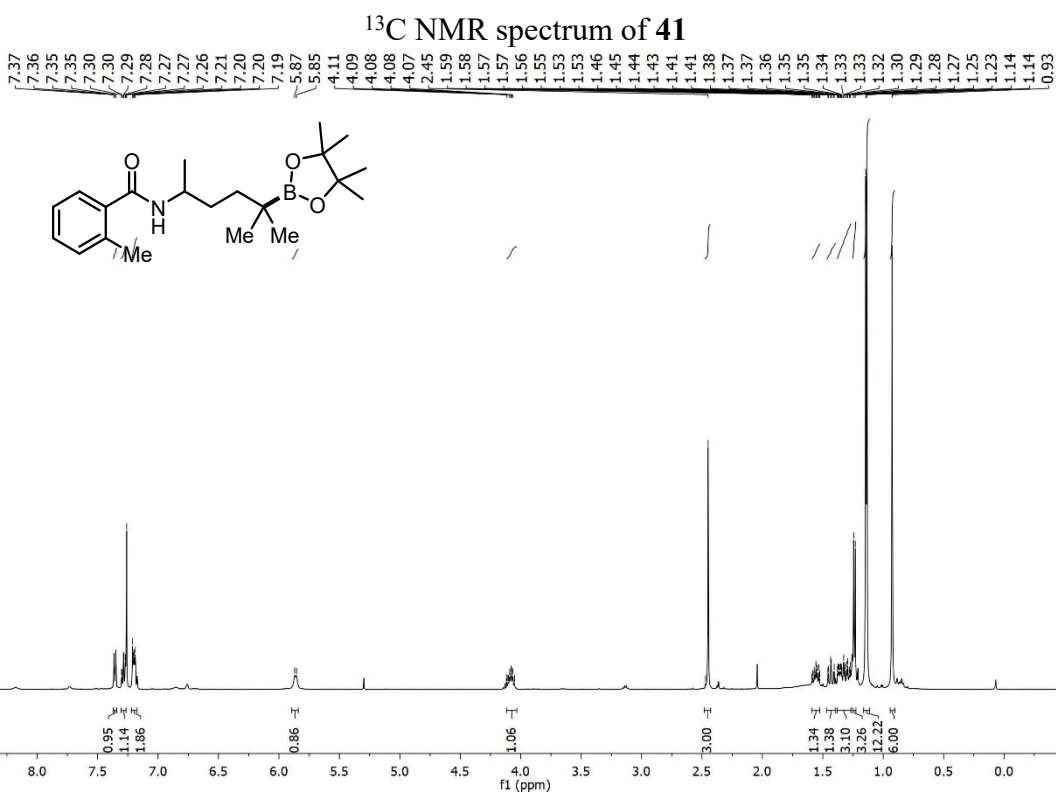

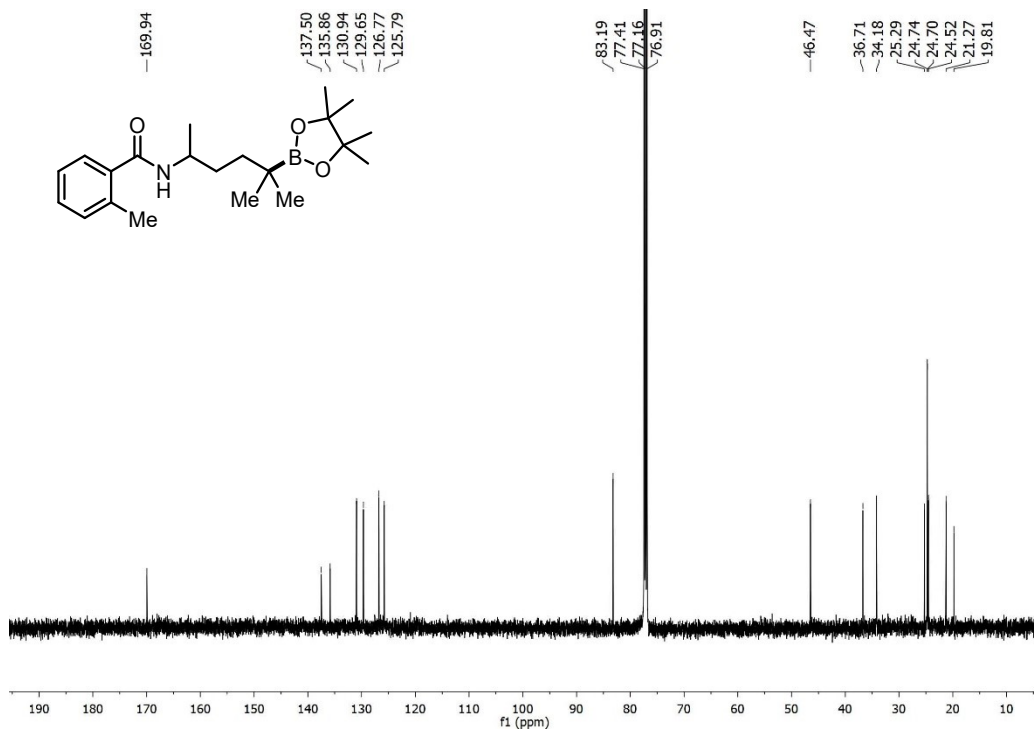

<sup>13</sup>C NMR spectrum of 42

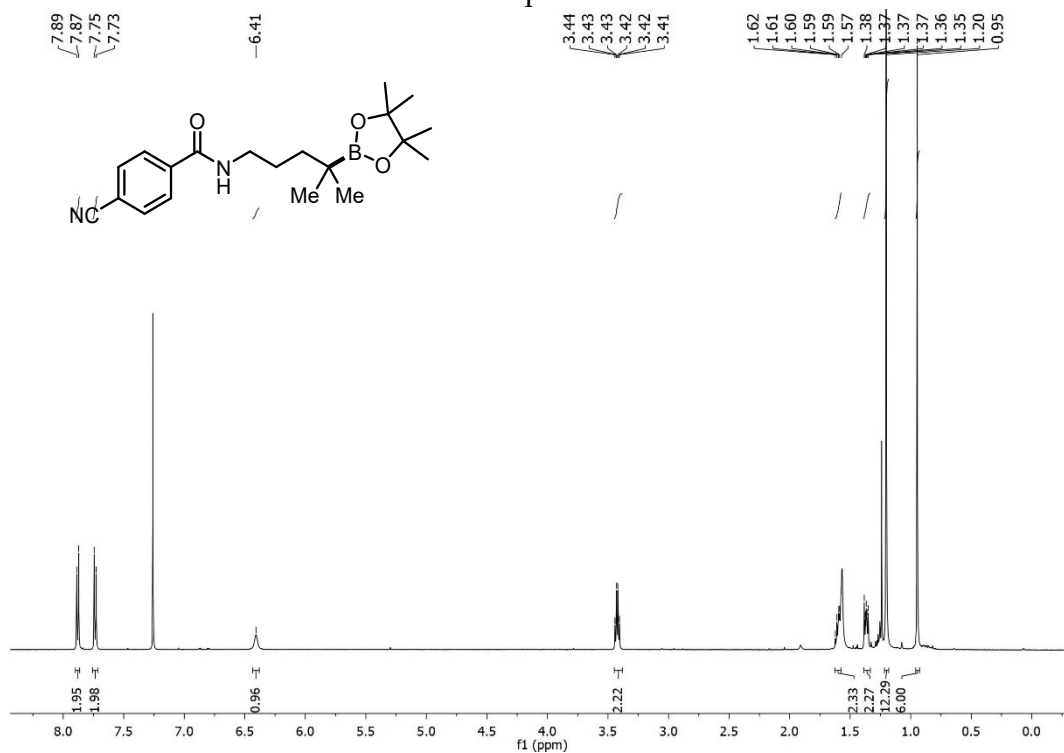

<sup>1</sup>H NMR spectrum of 43

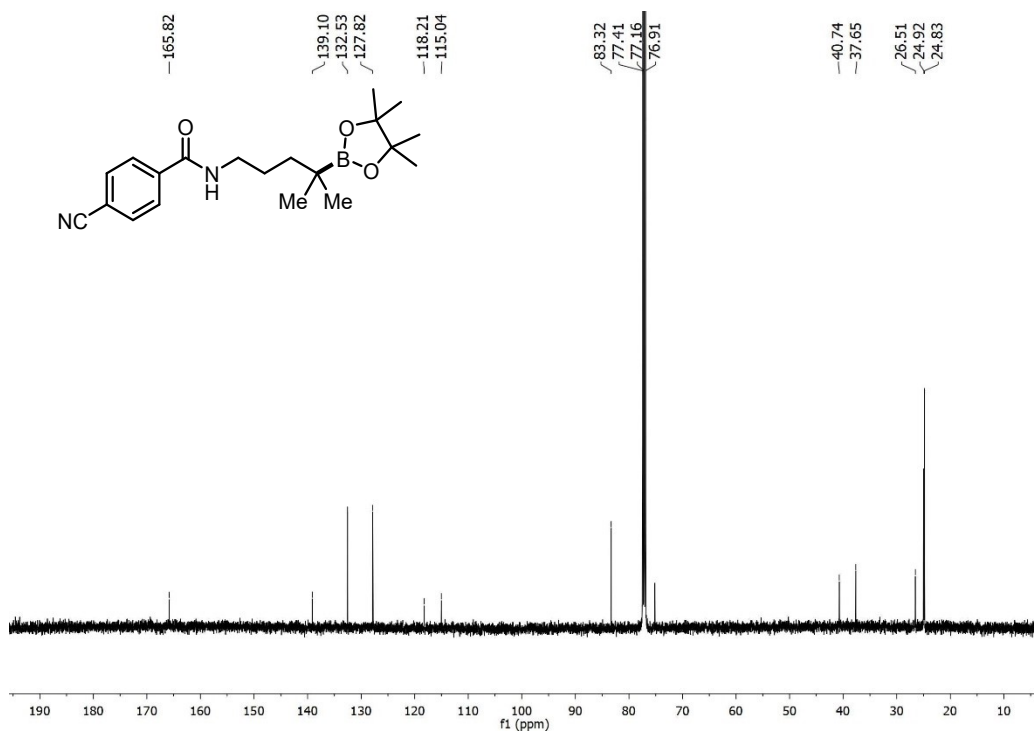

<sup>13</sup>C NMR spectrum of 43

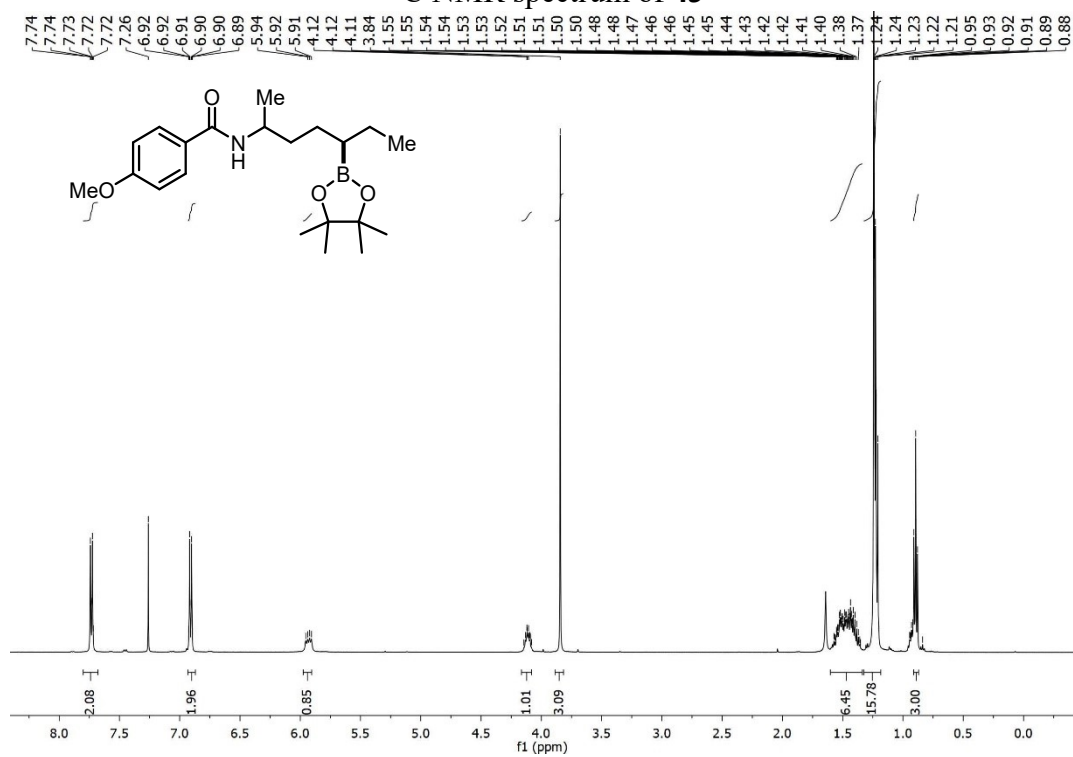

<sup>1</sup>H NMR spectrum of 44

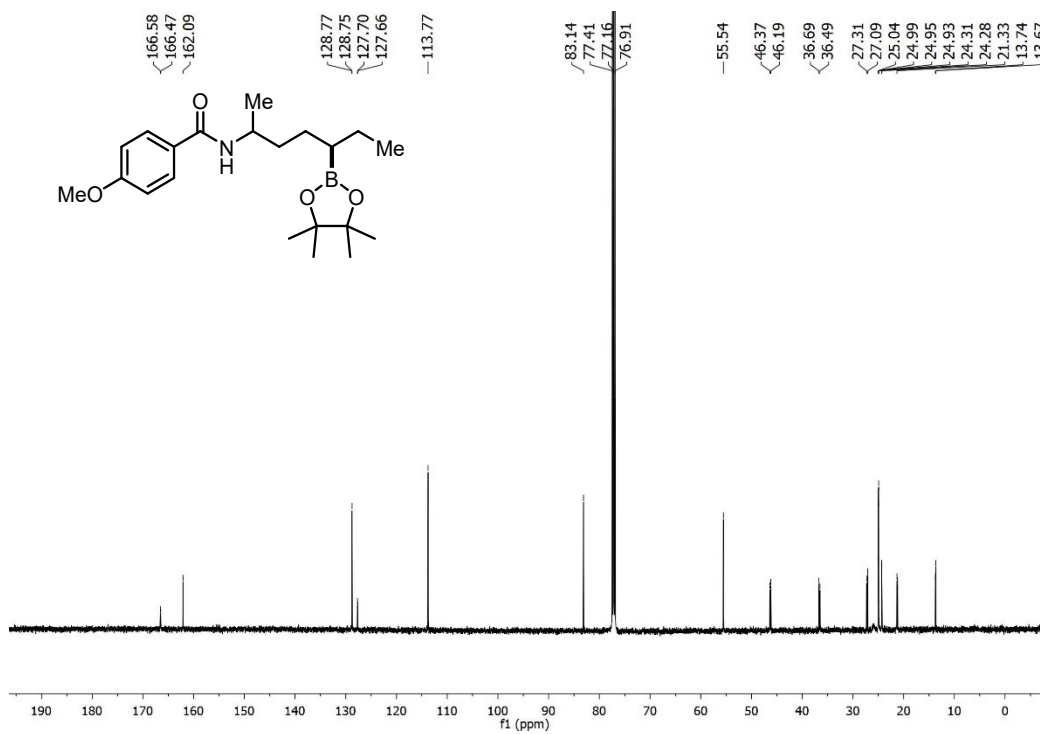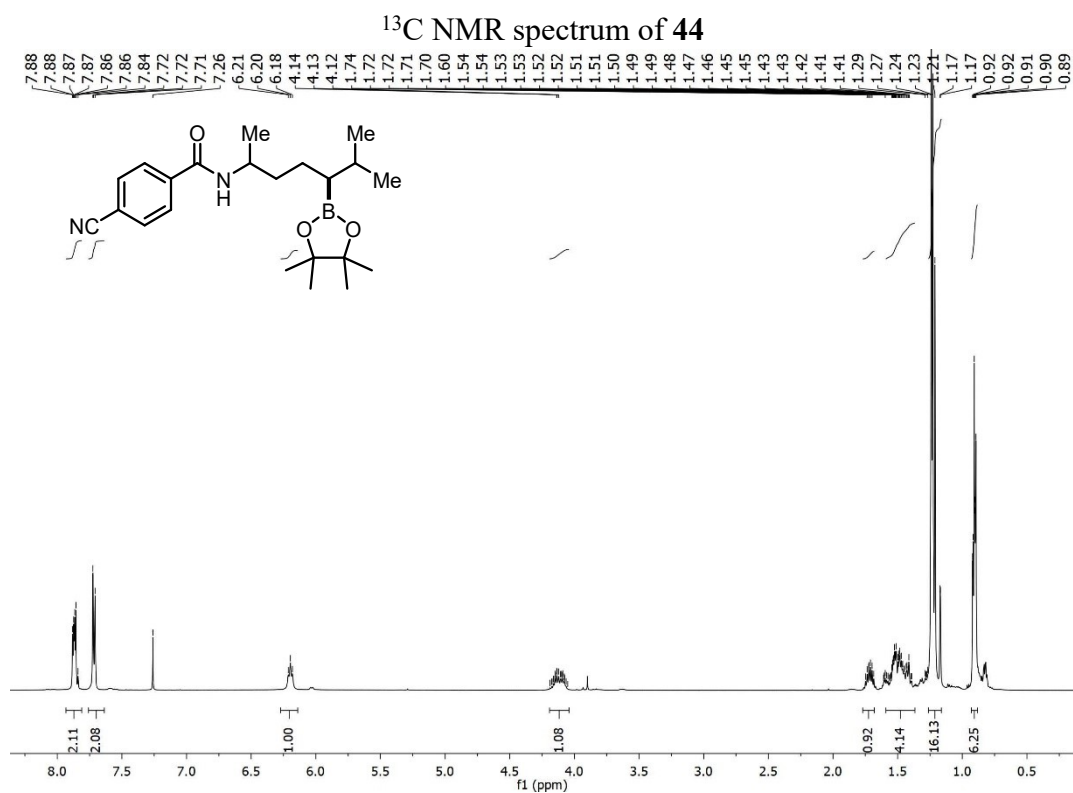

**<sup>1</sup>H NMR spectrum of 45**

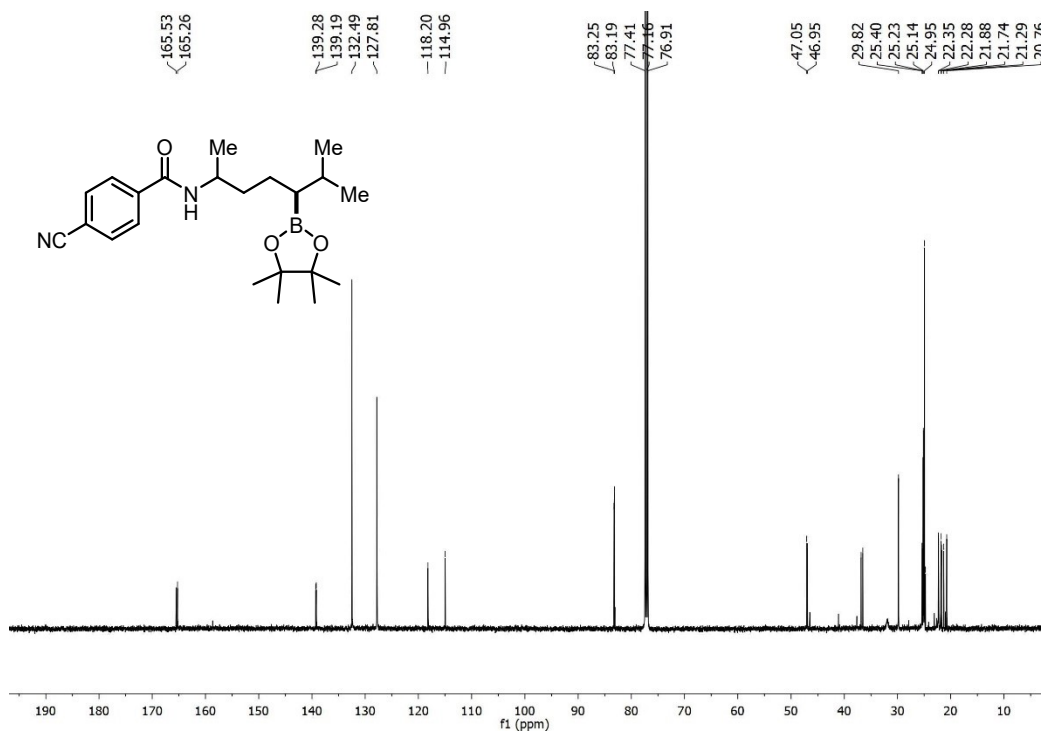

<sup>13</sup>C NMR spectrum of 45

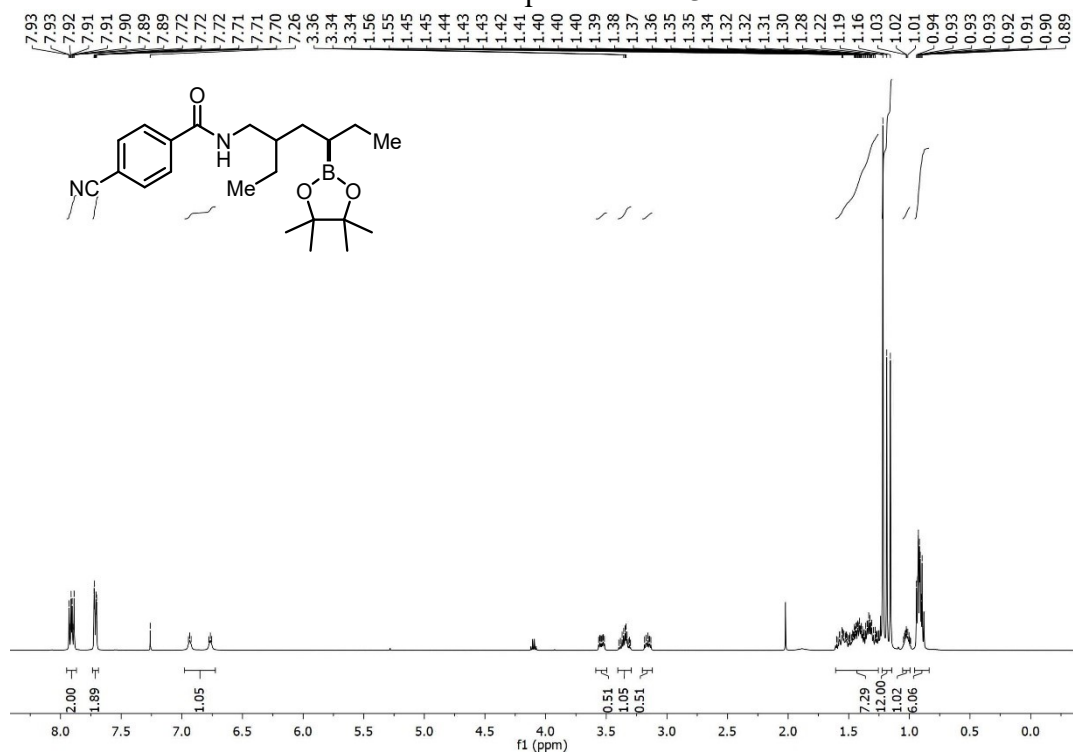

<sup>1</sup>H NMR spectrum of 46

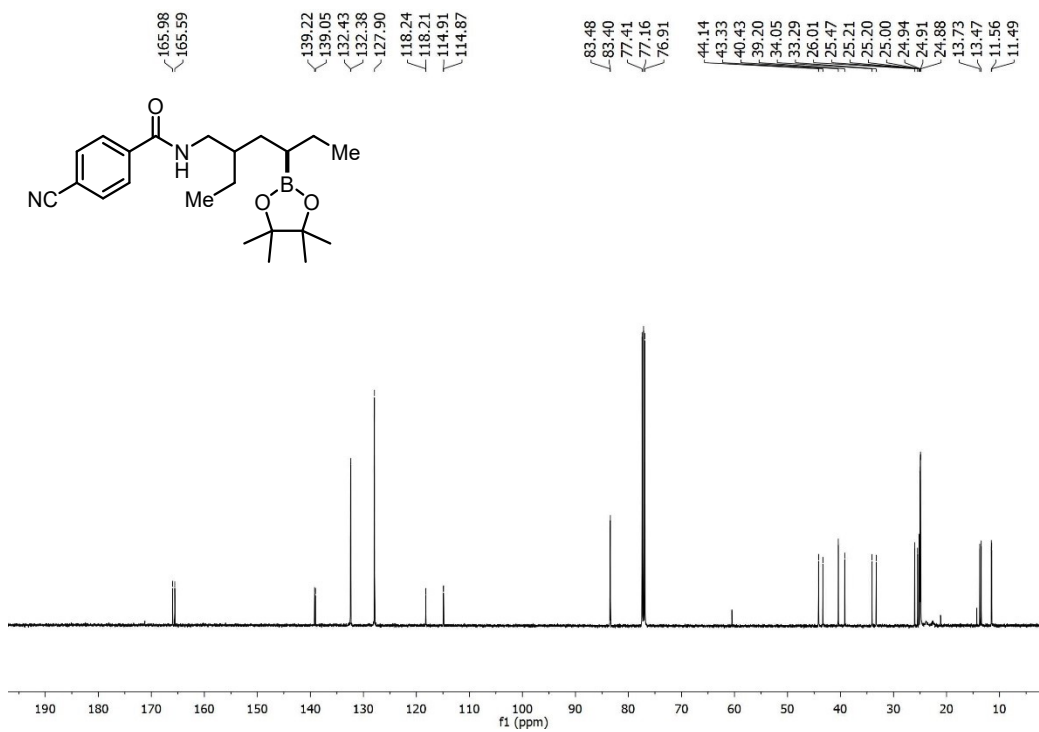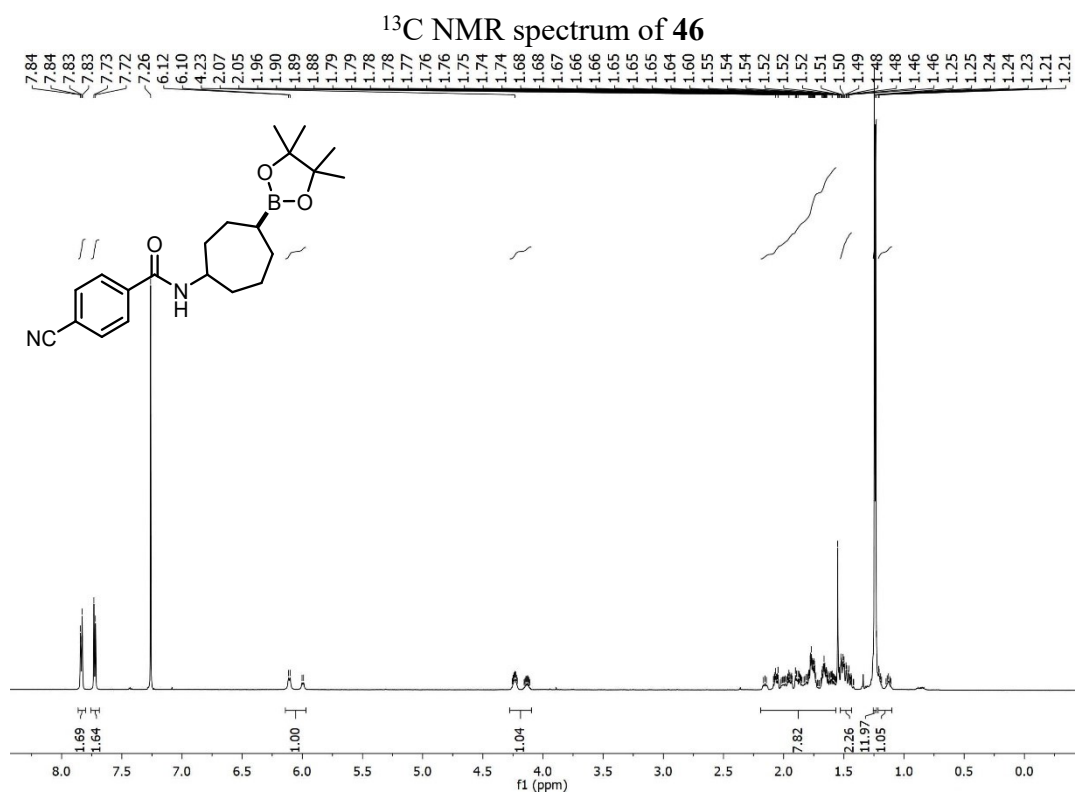

<sup>1</sup>H NMR spectrum of **47**



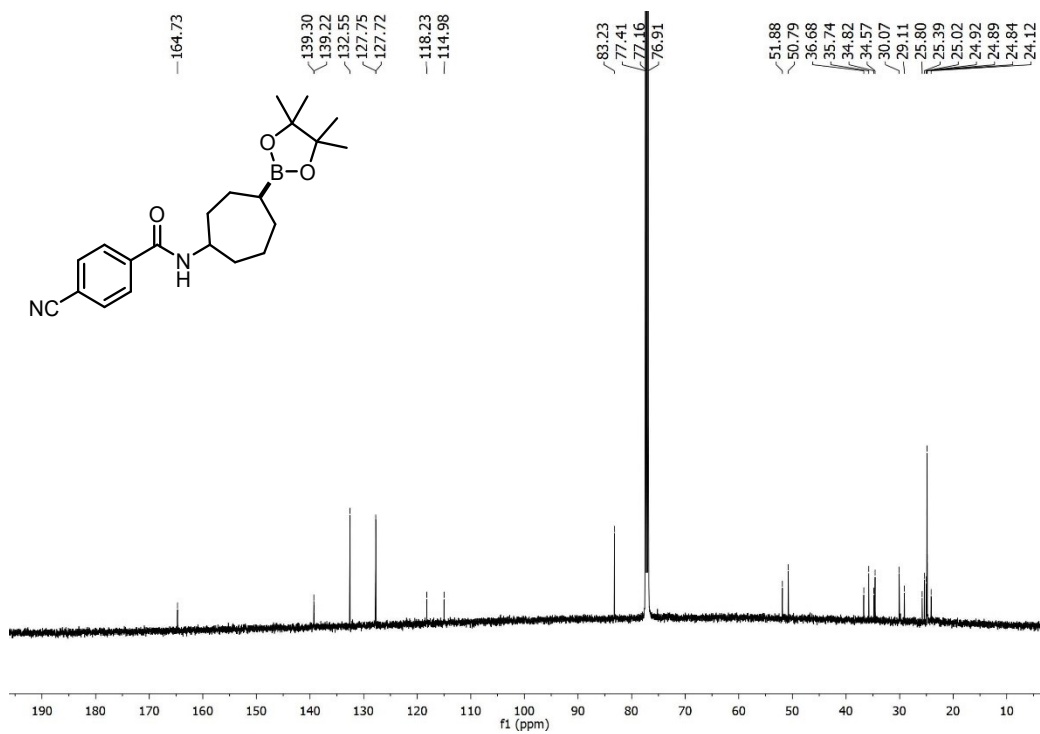

<sup>13</sup>C NMR spectrum of **47**

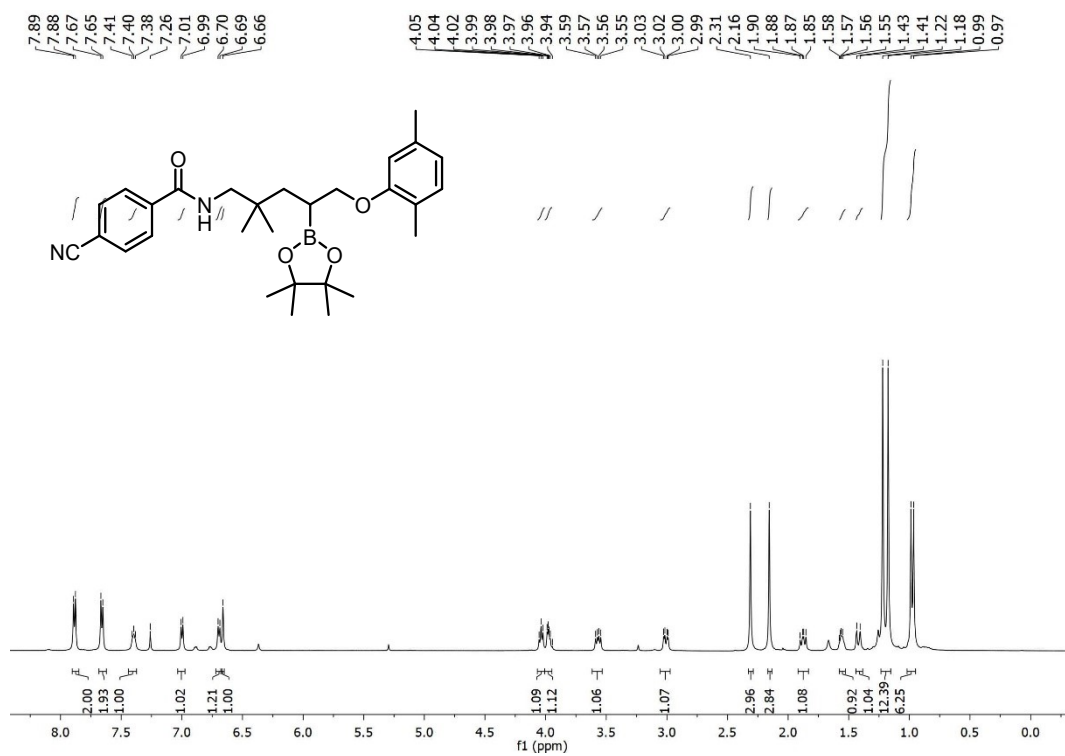

<sup>1</sup>H NMR spectrum of **48**

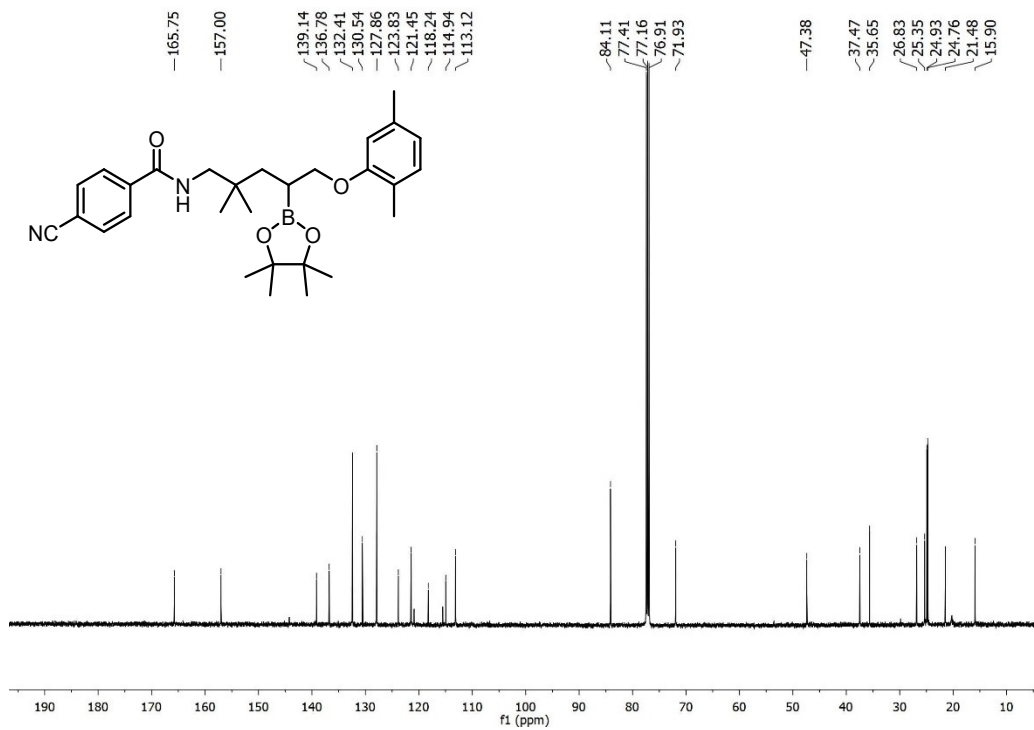

<sup>13</sup>C NMR spectrum of **48**

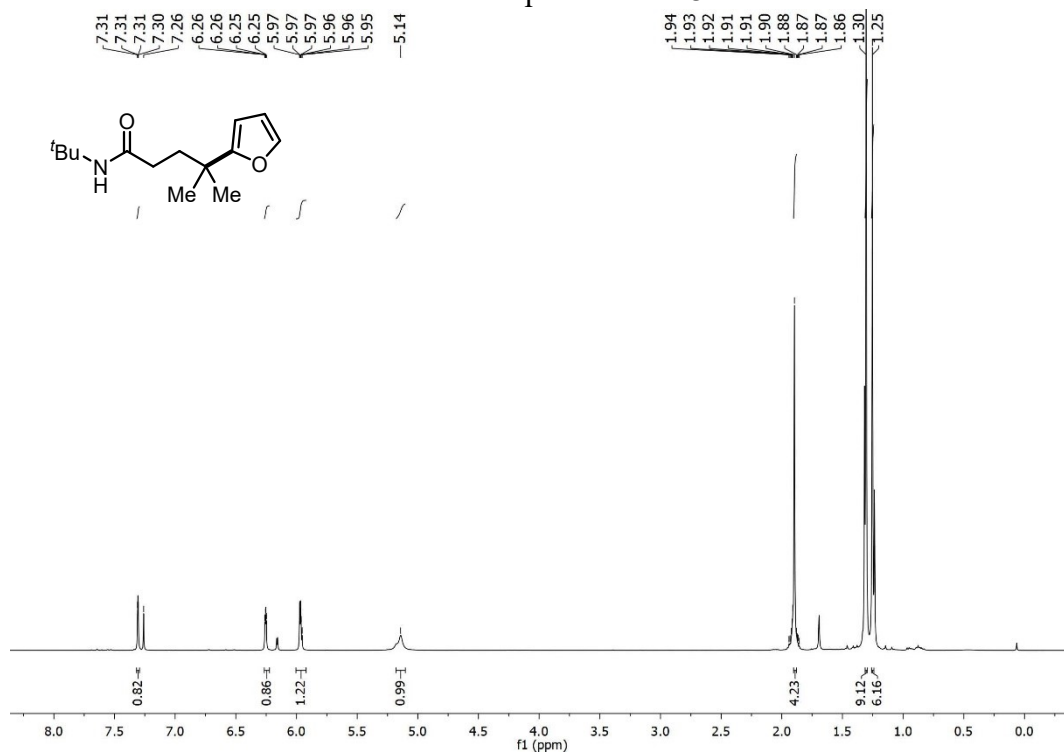

<sup>1</sup>H NMR spectrum of **49**

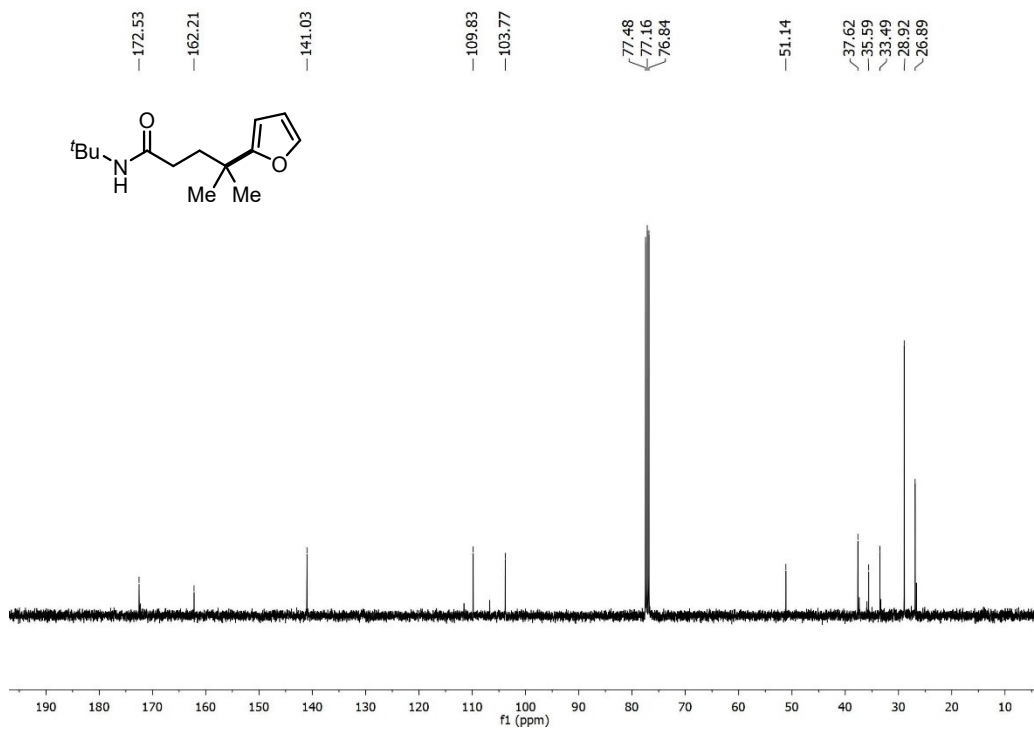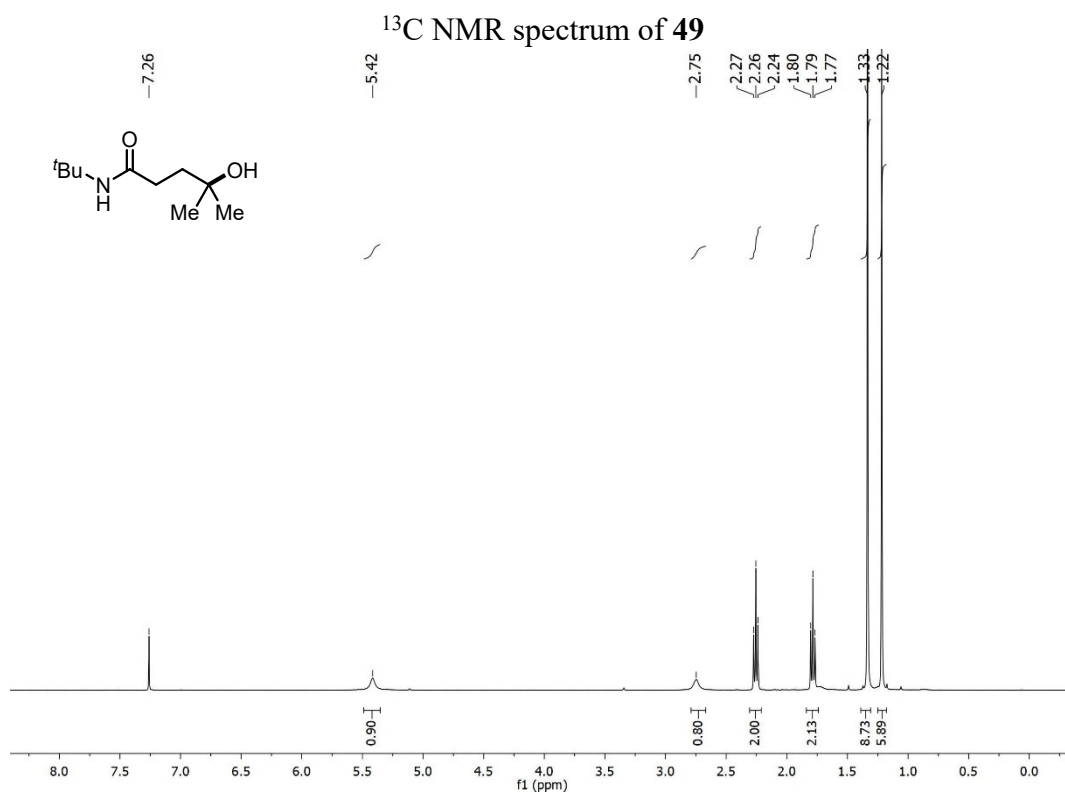

<sup>1</sup>H NMR spectrum of **50**

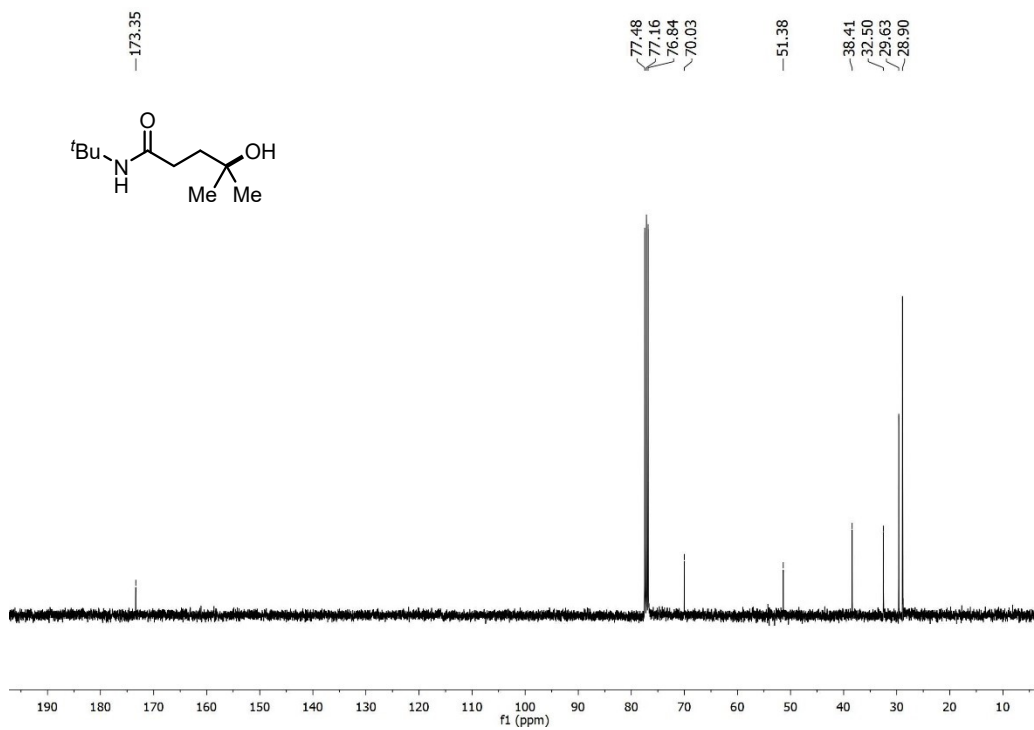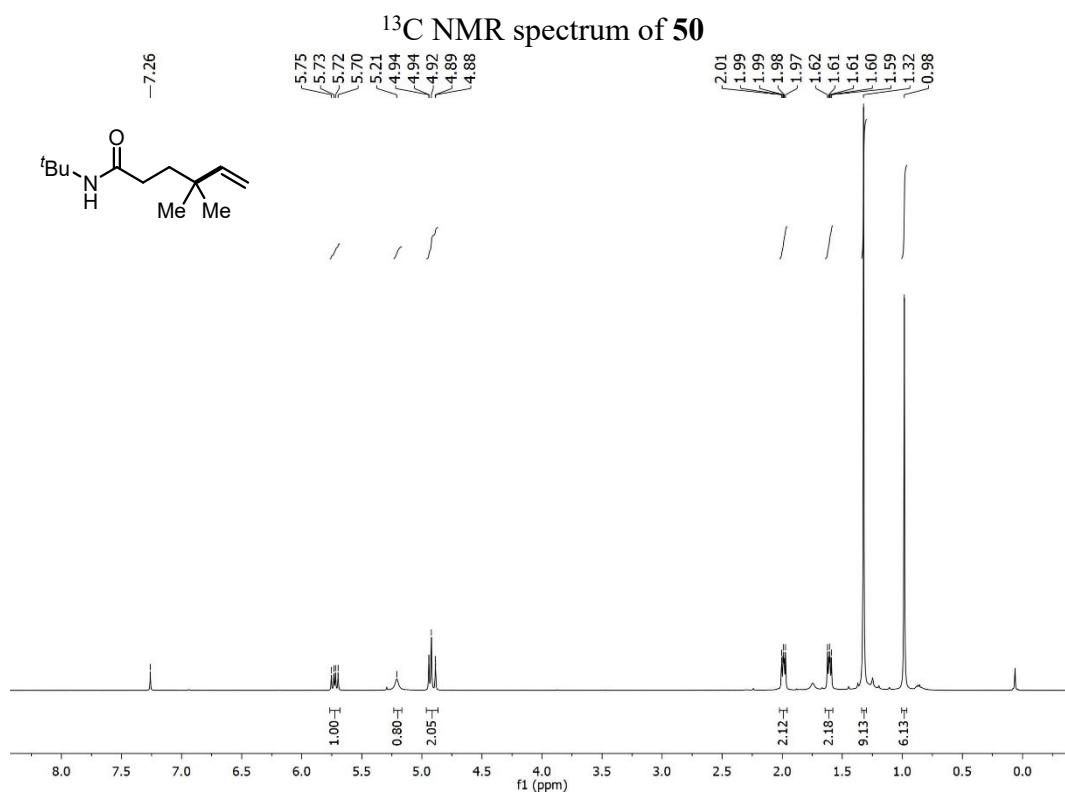

<sup>1</sup>H NMR spectrum of 51

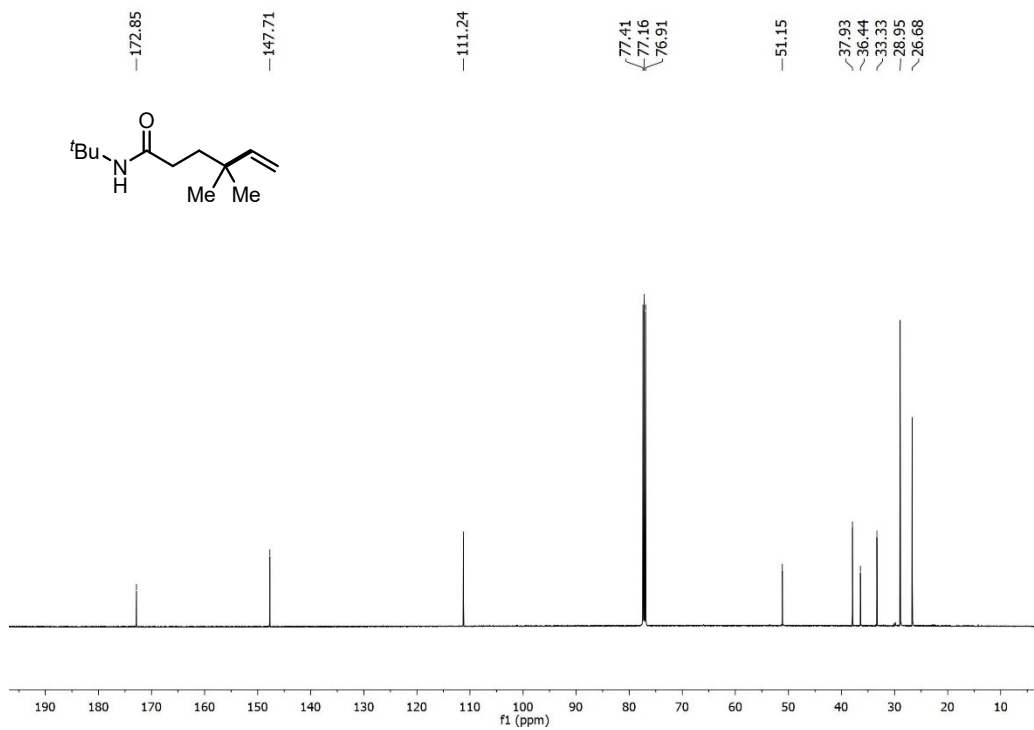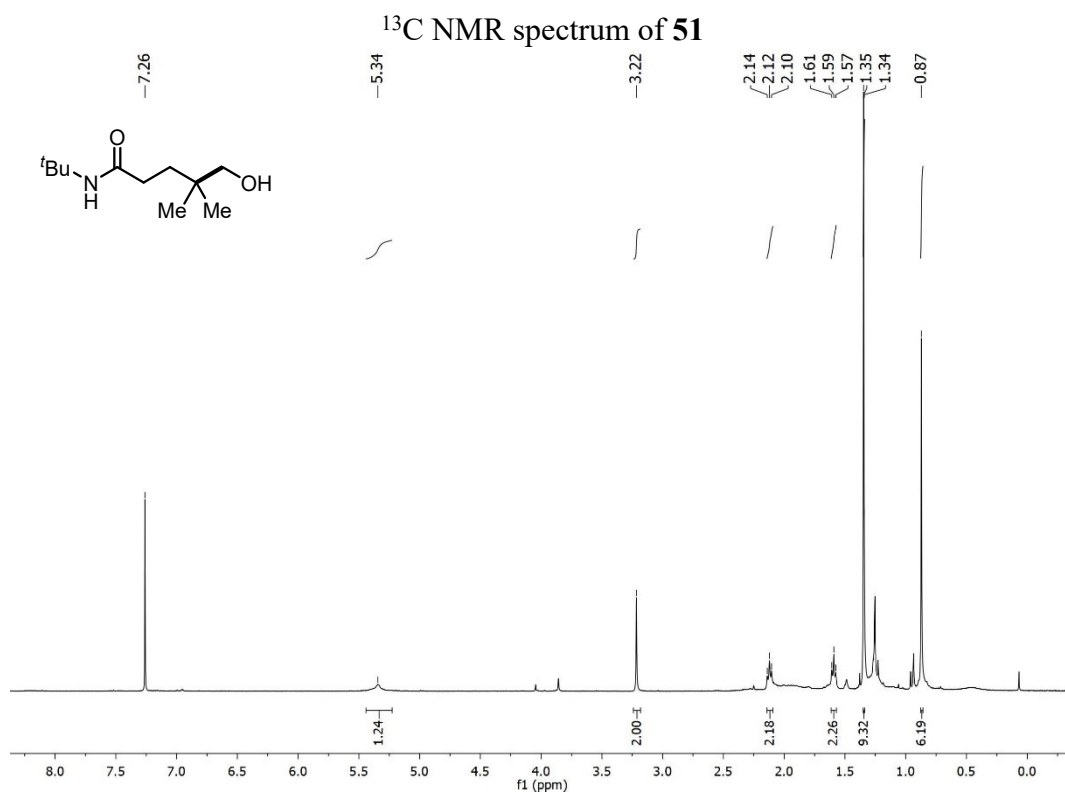

<sup>1</sup>H NMR spectrum of 52

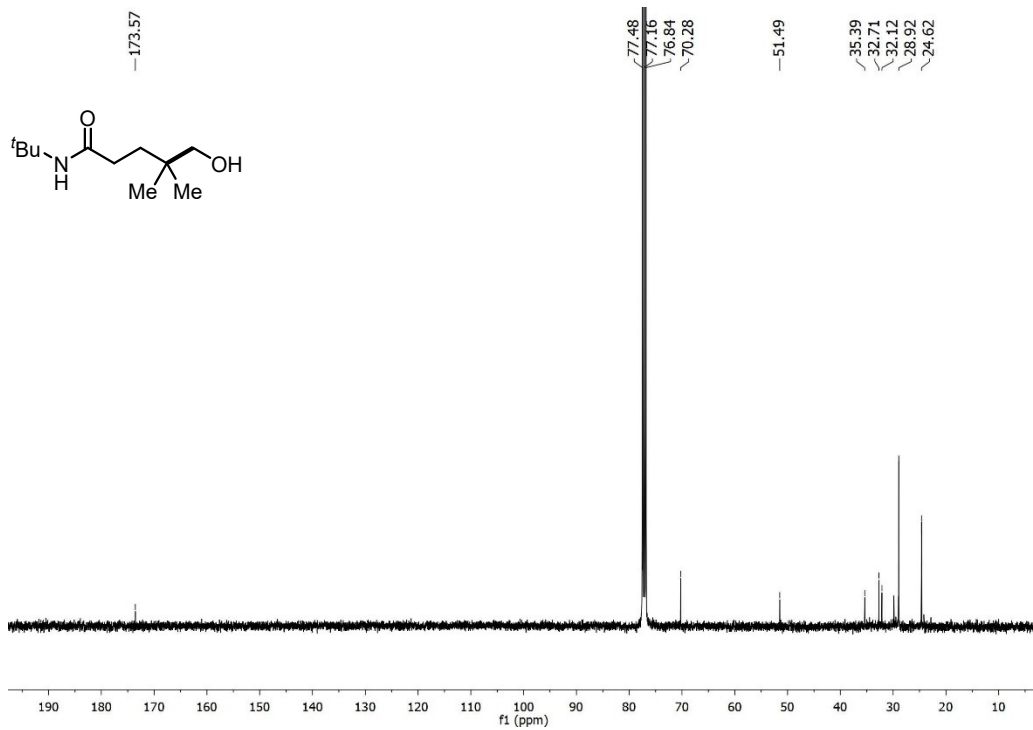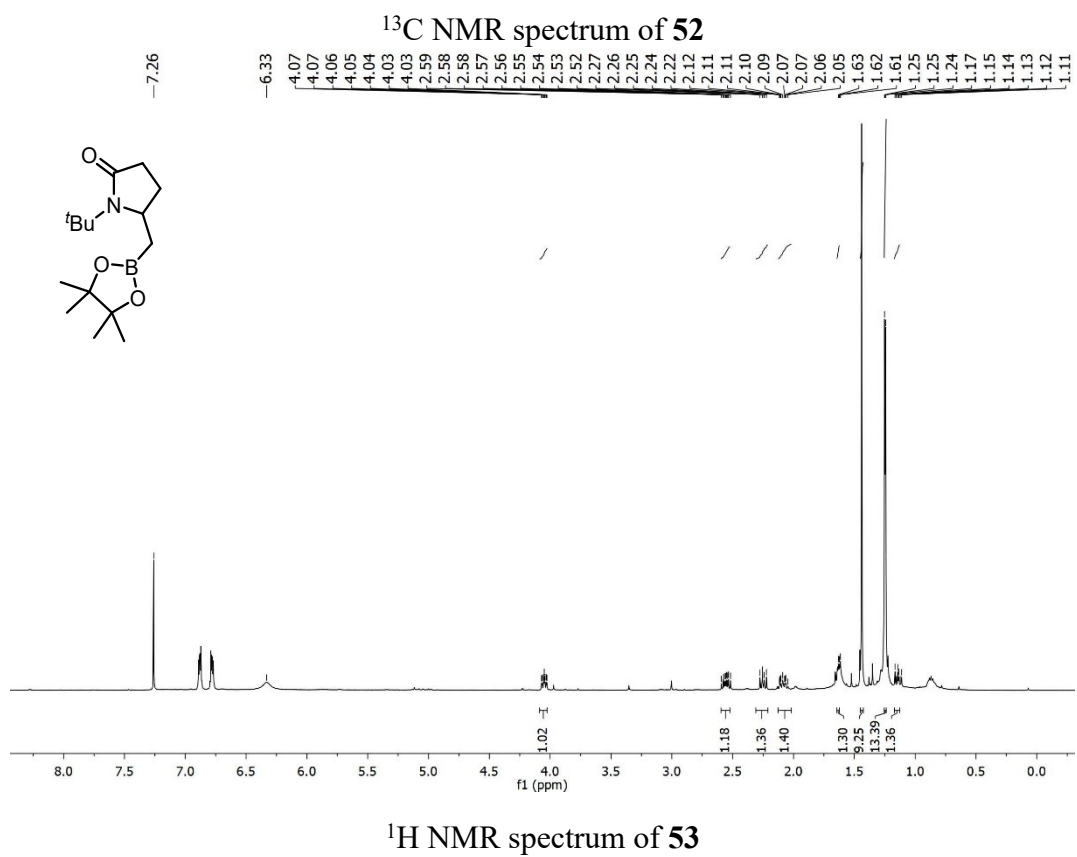

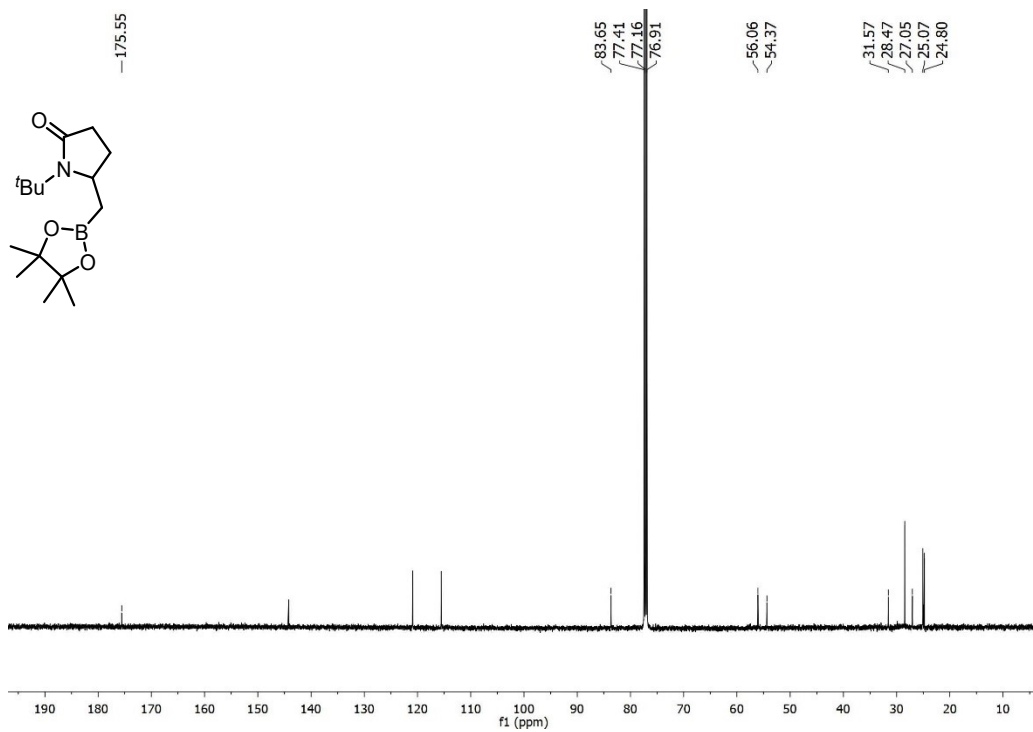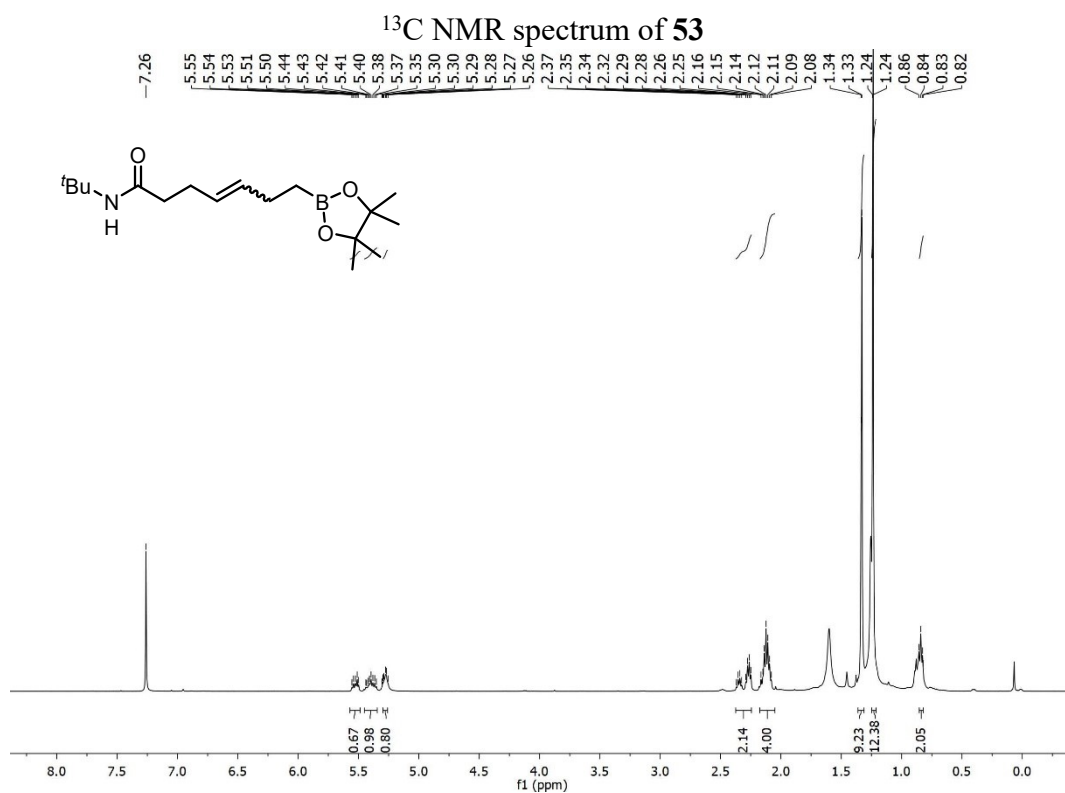

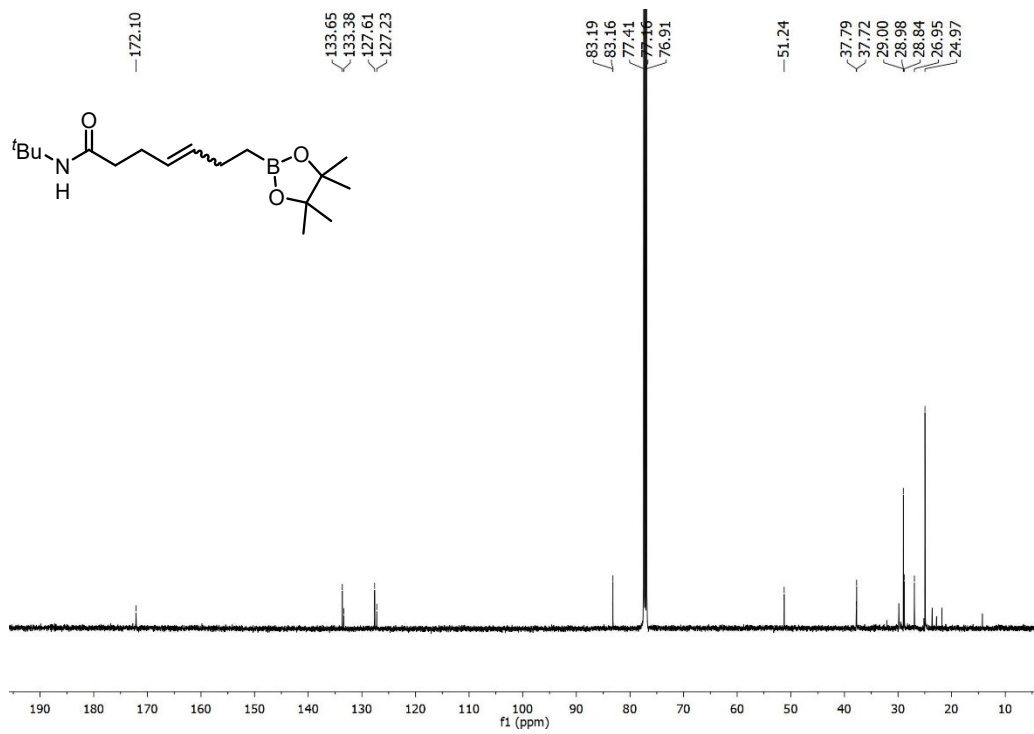

$^{13}\text{C}$  NMR spectrum of **54**
